# Supplementary material for: Theoretical Perspectives on the Gas-Phase Oxidation Mechanism and Kinetics of Carbazole Initiated by OH Radical in the Atmosphere
Source: MDPI journal article supplement (doi:10.3390/atmos13071129), 2022-07-17
Supplement: s1 [file s1]

Supplementary Material

# Theoretical Perspectives on the Gas-phase Oxidation Mechanism and Kinetics of Carbazole Initiated by OH Radical in the Atmosphere

Zhuochao Teng <sup>1</sup>, Xiaotong Wang <sup>1</sup>, Mohammad Hassan Hadizadeh <sup>1</sup>, Yanan Han <sup>1</sup>, Xianwei Zhao <sup>1</sup>, Qi Zhang <sup>1</sup>, Hetong Wang <sup>1</sup>, Ying L i <sup>1</sup>, Fei Xu <sup>1,\*</sup> and Yanhui Sun <sup>2</sup>

<sup>1</sup> Environment Research Institute, Shandong University, Qingdao 266237, China.

<sup>2</sup> College of Environment and Safety Engineering, Qingdao University of Science & Technology, Qingdao 266042, China.

\* Correspondence: xufei@sdu.edu.cn; Fax: 86-532-5863 1986.

**Table S1.** Comparison of the geometrical parameters of carbazole degradation by OH radical in M06-2X method with those of other 5 kinds of methods.

**Table S2.** Imaginary frequencies (in  $\text{cm}^{-1}$ ), zero-point energies (ZPE, in a.u.) and total energies (in a.u.) for the transition states involved in the oxidation reaction of carbazole initiated by OH radical.

**Table S3.** Cartesian coordinates for the transition states in the oxidation reaction of carbazole initiated by OH radical.

**Table S4.** Calculated bond lengths (angstrom) and bond energies ( $\text{kcal mol}^{-1}$ ) of C-H bonds and O-H bonds in the intermediates IM12-IM15 at M06-2X/6-311++G(3df,2p)//M06-2X/6-311+G(d,p) level.

**Table S5.** Comparison of the rate constants and lifetime of carbazole degradation by OH radical with those of other 5 kinds of NSO-HETs.

**Table S6.** RRKM calculated rate constants (in  $\text{cm}^3 \text{ molecule}^{-1} \text{ s}^{-1}$ ) for TS1, TS5 and TS14 involved in the OH-initiated oxidation degradation of carbazole at 298 K and 10–670 torr.

**Table S1** Comparison of the geometrical parameters of carbazole degradation by OH radical in M06-2X method with those of other 5 kinds of methods.

| Parameter              | HF/6-31G*<br>(Lee and Boo,<br>1996) | MP2/6-31G*<br>(Lee and Boo,<br>1996) | B3LYP/6-31G*<br>(Lee and Boo,<br>1996) | M06-2X/6-<br>311G(d,p)<br>(this paper) | X-ray<br>(Batra et al., 1974) | Error rate 1<br>(%) | Error rate 2<br>(%) |
|------------------------|-------------------------------------|--------------------------------------|----------------------------------------|----------------------------------------|-------------------------------|---------------------|---------------------|
| Bond Length (angstrom) |                                     |                                      |                                        |                                        |                               |                     |                     |
| C1-C2                  | 1.380                               | 1.392                                | 1.393                                  | 1.386                                  | 1.390                         | 0.3%                | 0.4%                |
| C2-C3                  | 1.397                               | 1.409                                | 1.407                                  | 1.403                                  | 1.398                         | 0.4%                | 0.4%                |
| C3-C4                  | 1.380                               | 1.391                                | 1.392                                  | 1.386                                  | 1.395                         | 0.7%                | 0.4%                |
| C4-C11                 | 1.391                               | 1.403                                | 1.400                                  | 1.397                                  | 1.400                         | 0.2%                | 0.4%                |
| C11-C12                | 1.455                               | 1.443                                | 1.450                                  | 1.450                                  | 1.467                         | 1.2%                | 0.5%                |
| C1-C10                 | 1.389                               | 1.399                                | 1.397                                  | 1.394                                  | 1.395                         | 0.1%                | 0.4%                |
| C10-C11                | 1.401                               | 1.419                                | 1.421                                  | 1.412                                  | 1.404                         | 0.6%                | 0.5%                |
| C10-N                  | 1.378                               | 1.383                                | 1.387                                  | 1.382                                  | 1.414                         | 2.3%                | 0.1%                |
| C1-H                   | 1.076                               | 1.088                                | 1.087                                  | 1.084                                  | 0.897                         | 20.9%               | 0.4%                |
| C2-H                   | 1.076                               | 1.088                                | 1.087                                  | 1.084                                  | 0.981                         | 10.5%               | 0.4%                |
| C3-H                   | 1.075                               | 1.087                                | 1.086                                  | 1.083                                  | 1.070                         | 1.2%                | 0.4%                |
| C4-H                   | 1.076                               | 1.089                                | 1.087                                  | 1.084                                  | 0.983                         | 10.3%               | 0.5%                |
| N-H                    | 0.992                               | 1.012                                | 1.008                                  | 1.007                                  | 0.964                         | 4.5%                | 0.5%                |

**Continued Table S1**

| Bond Angle (degree) |       |       |       |       |       |      |      |
|---------------------|-------|-------|-------|-------|-------|------|------|
| C1-C2-C3            | 121.5 | 121.4 | 121.3 | 121.4 | 121.3 | 0.1% | 0    |
| C2-C3-C4            | 120.5 | 120.9 | 120.7 | 120.7 | 120.4 | 0.3% | 0.2% |
| C3-C4-C11           | 119.2 | 118.8 | 119.2 | 119.4 | 119.5 | 0.1% | 0.5% |
| C4-C11-C12          | 134.0 | 133.8 | 134.1 | 134.0 | 134.1 | 0.1% | 0.2% |
| C1-C10-C11          | 121.8 | 122.0 | 121.9 | 121.8 | 122.3 | 0.4% | 0.2% |
| C2-C1-C10           | 117.7 | 117.4 | 117.6 | 117.6 | 117.7 | 0.1% | 0.2% |
| C4-C11-C10          | 119.5 | 119.4 | 119.2 | 119.4 | 118.8 | 0.5% | 0    |
| C10-C11-C12         | 106.5 | 106.8 | 106.7 | 106.6 | 107.1 | 0.5% | 0.2% |
| C10-N-C13           | 109.4 | 109.7 | 109.7 | 109.5 | 108.2 | 1.2% | 0.2% |
| C11-C10-N           | 108.8 | 108.4 | 108.4 | 108.6 | 108.8 | 0.2% | 0.2% |
| C2-C1-H             | 121.0 | 121.1 | 120.1 | 121.1 | 118.4 | 2.3% | 0    |
| C3-C2-H             | 119.3 | 119.4 | 119.4 | 119.4 | 118.4 | 0.8% | 0    |
| C4-C3-H             | 120.0 | 119.7 | 119.8 | 119.9 | 120.8 | 0.8% | 0.2% |
| C11-C4-H            | 121.5 | 120.6 | 120.4 | 120.4 | 120.3 | 0.1% | 0.2% |

Error rate 1 is the absolute value of error between M06-2X/6-311G(d,p) and X-ray method.

Error rate 2 is the absolute value of error between M06-2X/6-311G(d,p) and MP2/6-31G\* method.

**Table S2.** Imaginary frequencies (in  $\text{cm}^{-1}$ ), zero-point energies (ZPE, in a. u.) and total energies (in a.u.) for the transition states involved in the oxidation reaction of carbazole initiated by OH radical.

| Transition | Imaginary | ZPE     | Total energies |
|------------|-----------|---------|----------------|
| TS1        | 1371i     | 0.18348 | −593.14130     |
| TS2        | 1276i     | 0.18267 | −593.13971     |
| TS3        | 1288i     | 0.18279 | −593.13965     |
| TS4        | 1281i     | 0.18306 | −593.14073     |
| TS5        | 1035i     | 0.18530 | −593.15057     |
| TS6        | 521i      | 0.17033 | −667.05646     |
| TS7        | 1129i     | 0.16940 | −666.98378     |
| TS8        | 268i      | 0.16918 | −666.98017     |
| TS9        | 83i       | 0.17989 | −796.98436     |
| TS10       | 83i       | 0.16612 | −591.85203     |
| TS11       | 757i      | 0.19100 | −668.46080     |
| TS12       | 398i      | 0.18896 | −593.15356     |
| TS13       | 498i      | 0.18862 | −593.14944     |
| TS14       | 434i      | 0.18863 | −593.15079     |
| TS15       | 483i      | 0.18848 | −593.15024     |
| TS16       | 487i      | 0.18868 | −593.14738     |
| TS17       | 489i      | 0.18876 | −593.14581     |
| TS18       | 1553i     | 0.19337 | −743.44381     |
| TS19(a)    | 531i      | 0.19808 | −743.49119     |
| TS19(s)    | 433i      | 0.19804 | −743.49058     |
| TS20(a)    | 519i      | 0.19782 | −743.49055     |
| TS21(s)    | 525i      | 0.19787 | −743.50174     |
| TS22       | 1577i     | 0.19202 | −743.48779     |
| TS23(a)    | 573i      | 0.19766 | −743.48887     |
| TS23(s)    | 562i      | 0.19750 | −743.48926     |
| TS24(a)    | 480i      | 0.19767 | −743.49861     |
| TS24(s)    | 459i      | 0.19779 | −743.50015     |
| TS25(a)    | 631i      | 0.19703 | −743.48864     |
| TS25(s)    | 579i      | 0.19734 | −743.49094     |
| TS26       | 1082i     | 0.19335 | −743.48894     |

**Continued Table S2**

|         |       |         |            |
|---------|-------|---------|------------|
| TS27(a) | 437i  | 0.19717 | −743.49307 |
| TS27(s) | 475i  | 0.19738 | −743.49115 |
| TS28(a) | 520i  | 0.19793 | −743.48996 |
| TS28(s) | 495i  | 0.19670 | −743.47754 |
| TS29(a) | 346i  | 0.19686 | −743.48939 |
| TS29(s) | 442i  | 0.19664 | −743.47702 |
| TS30    | 1465i | 0.19300 | −743.48266 |
| TS31(a) | 627i  | 0.19740 | −743.49104 |
| TS31(s) | 619i  | 0.19727 | −743.49114 |
| TS32(a) | 507i  | 0.19812 | −743.49703 |
| TS32(s) | 514i  | 0.19816 | −743.50197 |
| TS33(a) | 522i  | 0.19738 | −743.48555 |
| TS33(s) | 535i  | 0.19766 | −743.49503 |
| TS34    | 713i  | 0.20064 | −743.49240 |
| TS35    | 571i  | 0.20005 | −743.47500 |
| TS36    | 486i  | 0.20058 | −743.51033 |
| TS37    | 2157i | 0.19631 | −743.46723 |
| TS38    | 1022i | 0.19570 | −819.90271 |
| TS39    | 1684i | 0.22094 | −743.46547 |
| TS40    | 2161i | 0.22005 | −819.90704 |
| TS41    | 1301i | 0.19559 | −743.49661 |
| TS42    | 1630i | 0.22045 | −819.92123 |
| TS43    | 695i  | 0.19801 | −743.54219 |
| TS44    | 339i  | 0.19732 | −743.48097 |
| TS45    | 870i  | 0.19485 | −743.51653 |
| TS46    | 1437i | 0.20019 | −893.78557 |
| TS47    | 528i  | 0.19267 | −893.22582 |
| TS48    | 1052i | 0.17410 | −742.34481 |
| TS49    | 419i  | 0.20677 | −873.38665 |
| TS50    | 1397i | 0.19643 | −818.67565 |
| TS51    | 774i  | 0.21833 | −744.79591 |
| TS52    | 315i  | 0.19391 | −668.35732 |

|                           |       |         |            |
|---------------------------|-------|---------|------------|
| TS53                      | 215i  | 0.19902 | −818.69550 |
| TS54                      | 914i  | 0.19818 | −818.72835 |
| TS55                      | 171i  | 0.20967 | −873.44264 |
| <b>Continued Table S2</b> |       |         |            |
| TS56                      | 725i  | 0.20009 | −743.45871 |
| TS57                      | 931i  | 0.20027 | −743.47563 |
| TS58                      | 414i  | 0.20072 | −743.47997 |
| TS59                      | 498i  | 0.20077 | −743.48065 |
| TS60                      | 1174i | 0.22109 | −819.90330 |
| TS61                      | 1600i | 0.19616 | −743.46596 |
| TS62                      | 2135i | 0.22038 | −819.85751 |
| TS63                      | 599i  | 0.22121 | −819.91128 |
| TS64                      | 627i  | 0.19790 | −743.54210 |
| TS65                      | 1413i | 0.20013 | −893.78580 |
| TS66                      | 1090i | 0.19112 | −854.72656 |
| TS67                      | 970i  | 0.17425 | −742.35123 |
| TS68                      | 225i  | 0.20712 | −873.44264 |
| TS69                      | 1368i | 0.19688 | −744.07657 |
| TS70                      | 1414i | 0.21660 | −744.74879 |
| TS71                      | 688i  | 0.20703 | −873.40113 |
| TS72                      | 934i  | 0.19837 | −743.46121 |
| TS73                      | 561i  | 0.19879 | −743.47196 |
| TS74                      | 601i  | 0.19974 | −743.49479 |
| TS75                      | 2249i | 0.19513 | −743.41140 |
| TS76                      | 383i  | 0.22304 | −819.89700 |
| TS77                      | 3975i | 0.19464 | −743.46640 |
| TS78                      | 1645i | 0.19422 | −743.47784 |
| TS79                      | 684i  | 0.19648 | −743.46409 |
| TS80                      | 722i  | 0.20179 | −893.83127 |
| TS81                      | 1904i | 0.19866 | −893.78688 |
| TS82                      | 266i  | 0.21735 | −743.48169 |
| TS83                      | 1001i | 0.19465 | −743.50947 |
| TS84                      | 373i  | 0.20624 | −873.36898 |
| TS85                      | 802i  | 0.21735 | −744.77412 |

---

|      |      |         |             |
|------|------|---------|-------------|
| TS86 | 569i | 0.20703 | −893.84263  |
| TS87 | 521i | 0.19973 | −743.50854  |
| TS88 | 141i | 0.21690 | −1023.72078 |
| TS89 | 323i | 0.20324 | −818.70096  |
| TS90 | 490i | 0.20133 | −818.71771  |

---

**Table S3** Cartesian coordinates for the transition states in the oxidation reaction of carbazole initiated by OH radical.

TS1

0 2

|   |             |             |             |
|---|-------------|-------------|-------------|
| C | −0.38291604 | 0.13991163  | 0.00000000  |
| C | −1.09152004 | 1.35428163  | −0.05874000 |
| C | −0.39142004 | 2.53961463  | −0.11048300 |
| C | 0.99373696  | 2.54180463  | −0.07438800 |
| C | 1.71014596  | 1.32506263  | −0.01331300 |
| C | 1.00425496  | 0.12093263  | 0.02337600  |
| H | −0.93689104 | −0.79029737 | 0.02578400  |
| H | −2.17441504 | 1.35053363  | −0.07692200 |
| H | −0.91226204 | 3.63771763  | −0.21681100 |
| H | 1.53491196  | −0.82298837 | 0.07390200  |
| C | 3.16804796  | 3.10069963  | −0.04778100 |
| C | 4.38125496  | 3.78755763  | −0.04720500 |
| C | 5.54413396  | 3.03504863  | 0.00400300  |
| C | 5.50893696  | 1.63310463  | 0.05345800  |
| C | 4.30027696  | 0.95571963  | 0.05273100  |
| C | 3.11356996  | 1.68932163  | 0.00242000  |
| H | 4.41383296  | 4.86971163  | −0.08651300 |
| H | 6.50153696  | 3.54228763  | 0.00507400  |
| H | 6.43809696  | 1.07836663  | 0.09226700  |
| H | 4.27483296  | −0.12733037 | 0.09050100  |
| O | −1.03024104 | 4.88025663  | 0.07292500  |
| H | −1.30802304 | 4.79849463  | 0.99819500  |
| N | 1.87716996  | 3.59453063  | −0.09354500 |
| H | 1.59440696  | 4.56190263  | −0.12681200 |

TS2

0 2

|   |             |             |             |
|---|-------------|-------------|-------------|
| C | −0.22091310 | 0.24300441  | 0.00000000  |
| C | 0.20654790  | −1.08362559 | −0.03164000 |
| C | −0.63604710 | −2.17486359 | −0.00630700 |
| C | −2.00265010 | −1.88897259 | 0.02986700  |
| C | −2.48426710 | −0.56014659 | 0.05321100  |
| C | −1.58448810 | 0.50642441  | 0.03818300  |
| H | 0.49986690  | 1.05047541  | −0.01726700 |
| H | 1.39520990  | −1.30252959 | −0.10346700 |
| H | −0.25500610 | −3.18879859 | −0.02399400 |
| H | −1.94395010 | 1.52918241  | 0.05448200  |



---

|   |             |             |            |
|---|-------------|-------------|------------|
| C | −4.25530010 | −2.01951159 | 0.08259500 |
| C | −5.57670910 | −2.46229459 | 0.10825900 |
| C | −6.57374610 | −1.49972059 | 0.13910700 |
| C | −6.26984310 | −0.12989159 | 0.14540300 |
| C | −4.95359510 | 0.30251541  | 0.11987900 |
| C | −3.93067310 | −0.64633859 | 0.08779700 |
| H | −5.81676510 | −3.51898559 | 0.10359800 |
| H | −7.61063610 | −1.81377459 | 0.15871700 |
| H | −7.07539610 | 0.59322741  | 0.17050000 |
| H | −4.72098210 | 1.36135841  | 0.12402000 |
| O | 2.61452190  | −1.55995359 | 0.21250400 |
| H | 2.56182590  | −1.42536959 | 1.17104000 |
| N | −3.08110210 | −2.75098959 | 0.04973100 |
| H | −3.02226210 | −3.75475559 | 0.02650100 |

TS3

02

|   |             |             |             |
|---|-------------|-------------|-------------|
| C | 0.48600882  | 0.05154639  | 0.00000000  |
| C | 0.38255682  | 1.44148639  | 0.05292200  |
| C | 1.53491782  | 2.21453239  | 0.10595600  |
| C | 2.76146982  | 1.55033839  | 0.11625000  |
| C | 2.85438882  | 0.14041739  | 0.07598600  |
| C | 1.68618982  | −0.62617561 | 0.02479000  |
| H | −0.53873918 | −0.59272861 | −0.08472000 |
| H | −0.59189818 | 1.91418739  | 0.04202000  |
| H | 1.47904682  | 3.29631339  | 0.13780900  |
| H | 1.72189282  | −1.70898061 | −0.00663100 |
| C | 4.96098982  | 1.04059139  | 0.15697100  |
| C | 6.35362682  | 1.09402739  | 0.19417000  |
| C | 7.04108182  | −0.10936261 | 0.17472600  |
| C | 6.36619082  | −1.33824761 | 0.11955300  |
| C | 4.98184182  | −1.38390661 | 0.08268000  |
| C | 4.26559782  | −0.18583461 | 0.10170800  |
| H | 6.88028082  | 2.03998739  | 0.23737500  |
| H | 8.12409082  | −0.09972261 | 0.20241900  |
| H | 6.93693382  | −2.25834661 | 0.10524100  |
| H | 4.46184682  | −2.33405561 | 0.03820500  |
| O | −1.57658918 | −1.27172461 | 0.23399300  |
| H | −1.46335718 | −1.29362361 | 1.19618600  |
| N | 4.03972482  | 2.07219339  | 0.16546900  |

|     |             |             |             |
|-----|-------------|-------------|-------------|
| H   | 4.26597982  | 3.05164839  | 0.19744900  |
| TS4 |             |             |             |
| 0 2 |             |             |             |
| C   | 0.05891016  | −0.06627393 | 0.00000000  |
| C   | 0.24806216  | −1.45797293 | 0.06437700  |
| C   | −0.82504184 | −2.33442193 | 0.12163000  |
| C   | −2.11198584 | −1.79698593 | 0.10918200  |
| C   | −2.33550484 | −0.40152193 | 0.04002100  |
| C   | −1.22689584 | 0.43015707  | −0.02163000 |
| H   | 0.91151316  | 0.59972507  | −0.04080200 |
| H   | 1.25720816  | −1.85238493 | 0.07153200  |
| H   | −0.66569684 | −3.40474093 | 0.17617400  |
| H   | −1.41287284 | 1.62441707  | −0.10682900 |
| C   | −4.34979384 | −1.48582693 | 0.12438000  |
| C   | −5.73214984 | −1.66213893 | 0.15267900  |
| C   | −6.52192084 | −0.52366793 | 0.10015500  |
| C   | −5.95795784 | 0.75904407  | 0.02017600  |
| C   | −4.58307684 | 0.93036807  | −0.00764300 |
| C   | −3.76869984 | −0.20275893 | 0.04760500  |
| H   | −6.17375984 | −2.64975093 | 0.21348200  |
| H   | −7.60019384 | −0.62906093 | 0.12009000  |
| H   | −6.60894584 | 1.62346907  | −0.02160900 |
| H   | −4.13604084 | 1.91592107  | −0.07396600 |
| O   | −1.68614584 | 2.84347407  | 0.21160300  |
| H   | −1.52983084 | 2.79477507  | 1.16739400  |
| N   | −3.33795784 | −2.43063993 | 0.16102500  |
| H   | −3.47483984 | −3.42603993 | 0.20619600  |
| TS5 |             |             |             |
| 0 2 |             |             |             |
| C   | −0.16200294 | −0.58173784 | 0.00000000  |
| C   | −0.55631594 | 0.73768316  | −0.25160500 |
| C   | 0.38019606  | 1.73897616  | −0.47514200 |
| C   | 1.72374306  | 1.37900516  | −0.43058600 |
| C   | 2.13793206  | 0.05857616  | −0.15730100 |
| C   | 1.18410506  | −0.93183484 | 0.04740400  |
| H   | −0.91825794 | −1.34016484 | 0.16194800  |
| H   | −1.61149194 | 0.98180316  | −0.27494300 |

---

|   |            |             |             |
|---|------------|-------------|-------------|
| H | 0.08603906 | 2.76347316  | −0.66813000 |
| H | 1.48000706 | −1.95578384 | 0.24450900  |
| C | 3.97347206 | 1.41070316  | −0.42911700 |
| C | 5.30648406 | 1.80810816  | −0.47108000 |
| C | 6.27023206 | 0.83319616  | −0.24624800 |
| C | 5.91247206 | −0.49689584 | 0.00394500  |
| C | 4.57660206 | −0.88439784 | 0.04919600  |
| C | 3.59586006 | 0.07909116  | −0.15651500 |
| H | 5.57197206 | 2.84064316  | −0.66287400 |
| H | 7.31820506 | 1.10698516  | −0.26751100 |
| H | 6.68913606 | −1.23415384 | 0.16683600  |
| H | 4.30925506 | −1.91633784 | 0.24558400  |
| O | 2.81047306 | 4.26959716  | 0.52030400  |
| H | 2.80366006 | 3.90088916  | 1.41528200  |
| N | 2.83775506 | 2.17603716  | −0.66379000 |
| H | 2.82259106 | 3.22558616  | −0.51345300 |

TS6

0 2

|   |             |             |             |
|---|-------------|-------------|-------------|
| C | −0.42709866 | 0.22827687  | 0.00000000  |
| C | −0.80105866 | 1.51631587  | −0.38190200 |
| C | 0.15947134  | 2.48289187  | −0.68055700 |
| C | 1.49014734  | 2.11829687  | −0.56823000 |
| C | 1.87818134  | 0.82831987  | −0.16266600 |
| C | 0.91780034  | −0.13178513 | 0.10935400  |
| H | −1.19444566 | −0.50708913 | 0.21039700  |
| H | −1.85233866 | 1.76587087  | −0.45757600 |
| H | −0.11506666 | 3.48338187  | −0.99145100 |
| H | 1.19699634  | −1.13760113 | 0.40120900  |
| C | 3.72345634  | 2.14024887  | −0.54132400 |
| C | 5.05259234  | 2.52455487  | −0.62733400 |
| C | 6.02004734  | 1.57475687  | −0.29301800 |
| C | 5.65523934  | 0.28491287  | 0.08578700  |
| C | 4.31224834  | −0.10013413 | 0.15784900  |
| C | 3.34485834  | 0.84168787  | −0.13964600 |
| H | 5.31998634  | 3.52131387  | −0.95218600 |
| H | 7.06911234  | 1.83932787  | −0.34372700 |
| H | 6.42814734  | −0.43768613 | 0.31933200  |
| H | 4.04415034  | −1.11177413 | 0.43982900  |
| O | 2.50011734  | 4.11580187  | 0.50507900  |

|     |             |             |             |
|-----|-------------|-------------|-------------|
| O   | 3.57862434  | 4.52352087  | 0.88511100  |
| N   | 2.60994634  | 2.93936187  | −0.83849500 |
| TS7 |             |             |             |
| O 2 |             |             |             |
| C   | −0.73631390 | −1.06774667 | −0.00963887 |
| C   | −0.27149890 | −2.37193667 | −0.36219187 |
| C   | −1.09222190 | −3.45004667 | −0.33492787 |
| C   | −2.46765590 | −3.30821367 | 0.19328513  |
| C   | −2.95352290 | −1.90239367 | 0.30365513  |
| C   | −2.08046790 | −0.83800367 | 0.28941013  |
| H   | −0.04298290 | −0.23661567 | −0.03451087 |
| H   | 0.76445610  | −2.49172067 | −0.65573987 |
| H   | −0.75081490 | −4.45075167 | −0.57054387 |
| H   | −2.44324590 | 0.17385133  | 0.42936813  |
| C   | −4.75544490 | −3.25505367 | −0.18455487 |
| C   | −6.06856090 | −3.63290167 | −0.38380987 |
| C   | −7.05321990 | −2.67650367 | −0.14609587 |
| C   | −6.71718690 | −1.38051467 | 0.25816913  |
| C   | −5.39201390 | −1.01180967 | 0.44761613  |
| C   | −4.39670690 | −1.96642267 | 0.23290713  |
| H   | −6.31196490 | −4.63708267 | −0.70781087 |
| H   | −8.09518090 | −2.93737667 | −0.28588387 |
| H   | −7.50416390 | −0.65550967 | 0.42646513  |
| H   | −5.13647690 | −0.01060067 | 0.77404313  |
| O   | −3.51152890 | −5.11759967 | 0.45297913  |
| O   | −2.55590990 | −4.01469767 | 1.46744913  |
| N   | −3.59985290 | −4.08157067 | −0.39170587 |

TS8

O 2

|   |             |             |             |
|---|-------------|-------------|-------------|
| C | −0.70692192 | −0.83210603 | 0.00000000  |
| C | −0.48230092 | −1.90005403 | −0.89843800 |
| C | −1.38982392 | −2.99420703 | −0.96334200 |
| C | −2.44098892 | −2.99242903 | −0.13697000 |
| C | −2.80622992 | −1.86145103 | 0.99878200  |
| C | −1.76363592 | −0.78056703 | 0.85679000  |
| H | 0.00989108  | −0.01872103 | 0.01491100  |
| H | 0.38199008  | −1.88877603 | −1.54806500 |

|     |             |             |             |
|-----|-------------|-------------|-------------|
| H   | −1.24168292 | −3.80458403 | −1.66693400 |
| H   | −1.86610792 | 0.03967797  | 1.55784800  |
| C   | −4.70025692 | −2.83889503 | −0.00170000 |
| C   | −5.98186392 | −3.08037803 | −0.43572900 |
| C   | −6.85339692 | −1.98824103 | −0.40371700 |
| C   | −6.42555192 | −0.74403103 | 0.05469000  |
| C   | −5.11832592 | −0.54076603 | 0.50785400  |
| C   | −4.24514892 | −1.61230203 | 0.48302600  |
| H   | −6.29359292 | −4.05545203 | −0.78737000 |
| H   | −7.87415392 | −2.11139303 | −0.74348700 |
| H   | −7.12543692 | 0.08314297  | 0.06406900  |
| H   | −4.80363092 | 0.42996897  | 0.87262500  |
| O   | −2.83021592 | −2.47535603 | 2.15498100  |
| O   | −3.49570692 | −4.36229403 | 1.21773700  |
| N   | −3.56957492 | −3.77194603 | 0.12336500  |
| TS9 |             |             |             |
| 01  |             |             |             |
| C   | 0.87759121  | −0.11456921 | −0.02148093 |
| C   | −0.26021779 | 0.60428179  | −0.39262193 |
| C   | −0.16459979 | 1.93092979  | −0.80768293 |
| C   | 1.10531121  | 2.46792479  | −0.82488693 |
| C   | 2.26448621  | 1.78009379  | −0.45178793 |
| C   | 2.14996821  | 0.46184779  | −0.04364793 |
| H   | 0.76956821  | −1.14322121 | 0.30001307  |
| H   | −1.23107079 | 0.12737779  | −0.34896293 |
| H   | −1.02532579 | 2.52552879  | −1.08633193 |
| H   | 3.01950021  | −0.10937521 | 0.25796107  |
| C   | 2.87701221  | 3.94095379  | −1.01520293 |
| C   | 3.62746421  | 5.07978479  | −1.21918393 |
| C   | 4.99224321  | 4.96486979  | −0.96322893 |
| C   | 5.54110121  | 3.75800379  | −0.52593293 |
| C   | 4.75150521  | 2.62323879  | −0.32360193 |
| C   | 3.39288721  | 2.71818779  | −0.57268393 |
| H   | 3.16399221  | 6.00299079  | −1.54314893 |
| H   | 5.63462121  | 5.82572779  | −1.09797693 |
| H   | 6.60532921  | 3.70275879  | −0.33228793 |
| H   | 5.19374921  | 1.69833279  | 0.02601707  |
| O   | 0.71493821  | 4.65335379  | −1.57343093 |
| O   | −0.28618579 | 6.17844879  | 2.18500707  |

---

|   |             |            |             |
|---|-------------|------------|-------------|
| N | 1.47471521  | 3.78840979 | −1.20741893 |
| N | −0.26533179 | 6.05007579 | 0.98230407  |
| O | 0.47467221  | 5.18045379 | 0.48086307  |

#### TS10

0 2

|   |             |             |             |
|---|-------------|-------------|-------------|
| C | −0.11450381 | −0.82061067 | 0.00000000  |
| C | −0.64486381 | 0.43982333  | −0.26971300 |
| C | 0.19922919  | 1.54943133  | −0.36826200 |
| C | 1.54180219  | 1.31769533  | −0.21331800 |
| C | 2.12598919  | 0.09782333  | 0.05908000  |
| C | 1.25398319  | −0.99538767 | 0.16970200  |
| H | −0.77665481 | −1.67299867 | 0.09025200  |
| H | −1.71427281 | 0.56315533  | −0.39833700 |
| H | −0.19338481 | 2.53974333  | −0.56568900 |
| H | 1.64188819  | −1.97837167 | 0.41279600  |
| C | 4.32296119  | 1.16718133  | 0.49301300  |
| C | 5.70939919  | 1.15295833  | 0.62525900  |
| C | 6.38873819  | −0.04770967 | 0.50027200  |
| C | 5.67739619  | −1.21815567 | 0.23260200  |
| C | 4.29633019  | −1.19288267 | 0.09313500  |
| C | 3.58805119  | 0.00285833  | 0.23280500  |
| H | 6.22334219  | 2.08266433  | 0.83738900  |
| H | 7.46598719  | −0.07730867 | 0.60782100  |
| H | 6.20731519  | −2.15675467 | 0.12175700  |
| H | 3.76681919  | −2.10572767 | −0.15062000 |
| O | 4.16285219  | 3.40409533  | 0.51455500  |
| N | 3.57113219  | 2.37706533  | 0.70787200  |

#### TS11

0 2

|   |             |             |             |
|---|-------------|-------------|-------------|
| C | −0.97328246 | −0.76335877 | 0.00000000  |
| C | −1.37050446 | 0.34992323  | −0.74893600 |
| C | −0.43479246 | 1.20115823  | −1.32612700 |
| C | 0.90059154  | 0.88877923  | −1.12098900 |
| C | 1.32829254  | −0.23620777 | −0.38982800 |
| C | 0.37400854  | −1.06661877 | 0.18367500  |
| H | −1.72838946 | −1.40432577 | 0.43811800  |
| H | −2.42620246 | 0.55136323  | −0.88336100 |

---

|   |             |             |             |
|---|-------------|-------------|-------------|
| H | −0.71816646 | 2.06505123  | −1.91370000 |
| H | 0.66854554  | −1.93763177 | 0.75737900  |
| C | 3.17622254  | 0.87658623  | −1.19984000 |
| C | 4.49713754  | 1.18421323  | −1.48577000 |
| C | 5.46087754  | 0.32265823  | −0.97566000 |
| C | 5.10542254  | −0.79303977 | −0.20882400 |
| C | 3.77127154  | −1.08582977 | 0.06416000  |
| C | 2.78888154  | −0.24458677 | −0.44253600 |
| H | 4.74861954  | 2.05818723  | −2.07217500 |
| H | 6.50748054  | 0.52108023  | −1.17169700 |
| H | 5.88284554  | −1.44073577 | 0.17717200  |
| H | 3.50739954  | −1.95498677 | 0.65534700  |
| O | 1.99803954  | 2.54883123  | −2.48215600 |
| N | 2.02824254  | 1.57464923  | −1.55664300 |
| H | 2.03748754  | 3.34480923  | −1.83630600 |
| O | 2.21859854  | 3.57659023  | −0.34686000 |
| H | 1.50298054  | 3.81300923  | 0.25723700  |

TS12

02

|   |             |             |             |
|---|-------------|-------------|-------------|
| C | −0.57314430 | −0.50810014 | −0.03756586 |
| C | −0.80334830 | −1.87101514 | −0.27410786 |
| C | 0.23891670  | −2.74254014 | −0.55268286 |
| C | 1.52633370  | −2.21326514 | −0.58432286 |
| C | 1.77833770  | −0.84614714 | −0.34418086 |
| C | 0.71217470  | 0.01109086  | −0.07091486 |
| H | −1.41144330 | 0.14361486  | 0.17521714  |
| H | −1.81683430 | −2.25216314 | −0.23955386 |
| H | 0.05702870  | −3.79435314 | −0.73818786 |
| H | 0.88638970  | 1.06487286  | 0.11437214  |
| C | 3.75225670  | −1.93598914 | −0.75367586 |
| C | 5.14056170  | −2.15779414 | −0.87075886 |
| C | 5.96720470  | −1.02027214 | −0.76418686 |
| C | 5.44698670  | 0.23258286  | −0.45980786 |
| C | 4.07137170  | 0.42061086  | −0.30270486 |
| C | 3.21503470  | −0.66863614 | −0.44717286 |
| H | 5.52270670  | −3.07700414 | −1.29174186 |
| H | 7.03517270  | −1.14641214 | −0.89182986 |
| H | 6.11747770  | 1.07638386  | −0.35603386 |
| H | 3.67690970  | 1.40319886  | −0.07000786 |

---

|   |            |             |             |
|---|------------|-------------|-------------|
| O | 5.42477670 | −3.11278614 | 0.93146214  |
| H | 5.30362770 | −2.34469914 | 1.50949814  |
| N | 2.73342470 | −2.84491714 | −0.84696086 |
| H | 2.87084270 | −3.84178614 | −0.89138486 |

### TS13

0 2

|   |             |             |             |
|---|-------------|-------------|-------------|
| C | −0.17673048 | −0.50810014 | 0.00000000  |
| C | −0.53146748 | −1.86752914 | −0.00645100 |
| C | 0.41944052  | −2.86511914 | −0.14914200 |
| C | 1.75009552  | −2.47168114 | −0.28815700 |
| C | 2.12654952  | −1.10834814 | −0.28499600 |
| C | 1.14515852  | −0.12264414 | −0.13856000 |
| H | −0.94889748 | 0.24214286  | 0.11583000  |
| H | −1.57336048 | −2.14337914 | 0.10426900  |
| H | 0.13848952  | −3.91165914 | −0.15236200 |
| H | 1.41819552  | 0.92652286  | −0.13271300 |
| C | 3.99146852  | −2.41811314 | −0.54227100 |
| C | 5.32383052  | −2.74952214 | −0.71850400 |
| C | 6.26749152  | −1.70261014 | −0.73096600 |
| C | 5.82839752  | −0.34534514 | −0.70074700 |
| C | 4.49904652  | −0.03219614 | −0.53939600 |
| C | 3.55827252  | −1.07252614 | −0.45045500 |
| H | 5.65336752  | −3.77845714 | −0.79086700 |
| H | 7.27659952  | −1.91602114 | −1.05381500 |
| H | 6.57320252  | 0.43751386  | −0.76392800 |
| H | 4.17681752  | 1.00141986  | −0.48962200 |
| O | 7.00909852  | −1.88022114 | 1.13997400  |
| H | 6.21842152  | −1.59434814 | 1.62162000  |
| N | 2.88340952  | −3.24295514 | −0.44298000 |
| H | 2.90560952  | −4.24823914 | −0.46462300 |

### TS14

0 2

|   |             |             |             |
|---|-------------|-------------|-------------|
| C | 0.53000975  | −0.09572901 | 0.01387879  |
| C | 1.04410175  | 1.18246499  | 0.27217579  |
| C | 0.21495075  | 2.29165999  | 0.35805179  |
| C | −1.14977725 | 2.08674099  | 0.17581179  |
| C | −1.68545625 | 0.80938599  | −0.08638921 |



---

|   |             |             |             |
|---|-------------|-------------|-------------|
| C | −0.83163825 | −0.29016101 | −0.16529321 |
| H | 1.20657275  | −0.93920801 | −0.04362121 |
| H | 2.11136275  | 1.30874999  | 0.40945279  |
| H | 0.61632875  | 3.27791099  | 0.55885879  |
| H | −1.22728325 | −1.28013701 | −0.36114821 |
| C | −3.38315625 | 2.35831199  | −0.02292921 |
| C | −4.68060225 | 2.88709299  | −0.09373721 |
| C | −5.71233425 | 2.01325199  | −0.34643021 |
| C | −5.49120525 | 0.61170799  | −0.48408521 |
| C | −4.17209425 | 0.11432599  | −0.48365421 |
| C | −3.12217825 | 0.97902899  | −0.21466721 |
| H | −4.86157925 | 3.94695599  | 0.03959479  |
| H | −6.72915825 | 2.38089699  | −0.40057521 |
| H | −6.28788325 | −0.00556101 | −0.87285921 |
| H | −3.99885825 | −0.94279701 | −0.64501921 |
| O | −6.10174525 | −0.03659801 | 1.33316279  |
| H | −5.41457425 | 0.39186499  | 1.86433279  |
| N | −2.19272925 | 3.00232299  | 0.21153379  |
| H | −2.09115625 | 3.98947799  | 0.37866579  |

TS15

0 2

|   |             |             |             |
|---|-------------|-------------|-------------|
| C | 0.55964652  | 0.22827687  | 0.00000000  |
| C | 0.04726952  | −1.04406913 | 0.30547300  |
| C | 0.87824752  | −2.13797913 | 0.48349000  |
| C | 2.25037652  | −1.93087513 | 0.34293400  |
| C | 2.78220452  | −0.66148513 | 0.02226800  |
| C | 1.92163952  | 0.42807687  | −0.14046100 |
| H | −0.12370748 | 1.05954787  | −0.11988400 |
| H | −1.02365248 | −1.17271413 | 0.40966900  |
| H | 0.47692552  | −3.11461513 | 0.72658100  |
| H | 2.32181652  | 1.41087687  | −0.36018000 |
| C | 4.49060352  | −2.16441813 | 0.25336900  |
| C | 5.79556352  | −2.65987413 | 0.27850600  |
| C | 6.83253052  | −1.77358813 | −0.00596600 |
| C | 6.58371152  | −0.43722813 | −0.30997900 |
| C | 5.27229952  | 0.08491787  | −0.28350600 |
| C | 4.21144352  | −0.81775113 | −0.04364300 |
| H | 5.99810952  | −3.70021613 | 0.50477300  |
| H | 7.85301352  | −2.13656913 | −0.00153800 |

---

|   |            |             |             |
|---|------------|-------------|-------------|
| H | 7.40662452 | 0.23043987  | −0.52932900 |
| H | 5.07059452 | 1.06045687  | −0.70406600 |
| O | 5.43055352 | 1.09409987  | 1.48283400  |
| H | 5.61333752 | 0.33550587  | 2.05743400  |
| N | 3.29608052 | −2.82304713 | 0.47985900  |
| H | 3.20292752 | −3.79899513 | 0.70422200  |

#### TS16

0 2

|   |             |             |             |
|---|-------------|-------------|-------------|
| C | 0.70692192  | −0.27245950 | 0.00000000  |
| C | 0.37360892  | −1.61747750 | −0.21835800 |
| C | 1.34738392  | −2.58410650 | −0.42703200 |
| C | 2.67731092  | −2.17512150 | −0.40564300 |
| C | 3.02906592  | −0.83038250 | −0.16580800 |
| C | 2.03247992  | 0.12858950  | 0.02683600  |
| H | −0.08112708 | 0.45407450  | 0.15350500  |
| H | −0.67011908 | −1.90926750 | −0.22812100 |
| H | 2.29317892  | 1.16550750  | 0.20559100  |
| C | 4.92469492  | −2.12644650 | −0.33261800 |
| C | 6.29271592  | −2.38839150 | −0.62463200 |
| C | 7.17992192  | −1.34105850 | −0.55291600 |
| C | 6.74008992  | −0.02563950 | −0.28370800 |
| C | 5.39340492  | 0.26522850  | −0.11481200 |
| C | 4.46883792  | −0.77184350 | −0.18321400 |
| H | 6.61691292  | −3.39982850 | −0.83493500 |
| H | 8.23480092  | −1.52224950 | −0.71865200 |
| H | 7.46943192  | 0.77408150  | −0.23797300 |
| H | 5.06522292  | 1.28668650  | 0.03678100  |
| N | 3.82468392  | −2.92678950 | −0.63902900 |
| H | 3.85069392  | −3.90445750 | −0.38693500 |
| H | 1.08162592  | −3.61922850 | −0.60430400 |
| O | 5.02498592  | −2.64711450 | 1.56563500  |
| H | 5.71302692  | −2.06624350 | 1.92125600  |

#### TS17

0 2

|   |             |             |            |
|---|-------------|-------------|------------|
| C | 0.20618556  | −0.21354933 | 0.00000000 |
| C | −0.18528944 | 1.12545967  | 0.08909700 |
| C | 0.74997056  | 2.14805967  | 0.20305200 |

|   |             |             |             |
|---|-------------|-------------|-------------|
| C | 2.09077956  | 1.78611667  | 0.21684600  |
| C | 2.49955156  | 0.44643167  | 0.12603800  |
| C | 1.55274956  | −0.56209433 | 0.02771500  |
| H | −0.54845144 | −0.98555633 | −0.08454900 |
| H | −1.23983144 | 1.37382967  | 0.07136100  |
| H | 0.44161756  | 3.18386667  | 0.27914500  |
| H | 1.85769756  | −1.60101633 | −0.01812000 |
| H | 3.20855056  | 3.60135367  | 0.35119000  |
| C | 4.35148056  | 1.83152067  | 0.22723900  |
| C | 5.68556656  | 2.21659567  | 0.11849300  |
| C | 6.62152456  | 1.22218167  | −0.11735100 |
| C | 6.24618856  | −0.13262133 | −0.27546700 |
| C | 4.93474456  | −0.52210133 | −0.14578000 |
| C | 3.96197456  | 0.44392267  | 0.23984400  |
| H | 5.97601056  | 3.25867767  | 0.17449700  |
| H | 7.66549056  | 1.49376667  | −0.21824400 |
| H | 7.00728356  | −0.86573433 | −0.51159800 |
| H | 4.63899656  | −1.55718333 | −0.26480200 |
| O | 3.97570256  | 0.19326667  | 2.15678300  |
| H | 4.92936956  | 0.22843167  | 2.32221700  |
| N | 3.22220656  | 2.59646167  | 0.30029800  |

TS18

02

|   |             |             |             |
|---|-------------|-------------|-------------|
| C | −0.04282656 | −0.05353319 | 0.00000000  |
| C | −0.20527656 | −1.44437719 | −0.05738700 |
| C | 0.88721944  | −2.29821119 | −0.11383100 |
| C | 2.15032644  | −1.71752519 | −0.11890000 |
| C | 2.33534144  | −0.32127019 | −0.06203500 |
| C | 1.22184644  | 0.51570381  | 0.00063500  |
| H | −0.91854956 | 0.58229681  | 0.04053900  |
| H | −1.20456556 | −1.86251519 | −0.06004400 |
| H | 0.75901444  | −3.37292319 | −0.15894400 |
| H | 1.34348944  | 1.59192081  | 0.04136100  |
| C | 4.36184444  | −1.36932019 | −0.18201900 |
| C | 5.79227444  | −1.57411819 | −0.30310100 |
| C | 6.57016444  | −0.37829419 | 0.01463700  |
| C | 5.98588044  | 0.85538681  | 0.11528100  |
| C | 4.57898144  | 1.02445581  | 0.06303400  |
| C | 3.76948744  | −0.08999419 | −0.07843300 |

|       |             |             |             |
|-------|-------------|-------------|-------------|
| H     | 5.88582744  | −1.67974719 | −1.51579300 |
| H     | 7.64650944  | −0.49574619 | 0.07284800  |
| H     | 6.61210144  | 1.72644881  | 0.26505900  |
| H     | 4.14870044  | 2.01344481  | 0.16424500  |
| O     | 6.27660744  | −2.82632219 | 0.13269400  |
| H     | 6.38427944  | −2.78869719 | 1.08820500  |
| N     | 3.40325844  | −2.32618019 | −0.15749700 |
| H     | 3.58756744  | −3.30929119 | −0.28579400 |
| O     | 4.28861444  | −1.16566819 | −2.78038100 |
| O     | 5.40184444  | −1.69889319 | −2.90789100 |
|       |             |             |             |
| TS19a |             |             |             |
| O 2   |             |             |             |
| C     | 0.85353878  | −0.15463917 | 0.03353562  |
| C     | 1.04511178  | −1.53854417 | 0.18750162  |
| C     | −0.01599122 | −2.42428917 | 0.11223562  |
| C     | −1.28136122 | −1.88861417 | −0.12411838 |
| C     | −1.49634922 | −0.50115217 | −0.28246638 |
| C     | −0.40537322 | 0.37085783  | −0.19894938 |
| H     | 1.70757878  | 0.50822483  | 0.09908862  |
| H     | 2.04249778  | −1.91989917 | 0.36955562  |
| H     | 0.13208178  | −3.49086517 | 0.23336662  |
| H     | −0.54404822 | 1.43989583  | −0.31307538 |
| C     | −3.47497922 | −1.59009117 | −0.47253838 |
| C     | −4.91323122 | −1.88466017 | −0.72001938 |
| C     | −5.69624122 | −0.60165217 | −0.78086238 |
| C     | −5.07941722 | 0.65700383  | −0.96707538 |
| C     | −3.72637422 | 0.80981383  | −0.79640038 |
| C     | −2.91265422 | −0.32993317 | −0.50923938 |
| H     | −5.32970522 | −2.49046817 | 0.09917462  |
| H     | −6.73623422 | −0.72799917 | −1.06107038 |
| H     | −5.69960222 | 1.51535983  | −1.19222638 |
| H     | −3.26765622 | 1.78657983  | −0.89978638 |
| O     | −5.10041722 | −2.69856217 | −1.87860338 |
| H     | −4.74757422 | −2.22118417 | −2.63664438 |
| N     | −2.50629822 | −2.52291617 | −0.24482438 |
| H     | −2.66105622 | −3.51859317 | −0.22389438 |
| O     | −6.13601522 | −0.51463117 | 1.22507062  |
| O     | −6.32880222 | −1.61110917 | 1.73797362  |

---

TS19s

0 2

|   |             |             |             |
|---|-------------|-------------|-------------|
| C | −0.97050509 | −0.55882352 | 0.01270461  |
| C | −1.09432909 | −1.95501952 | −0.07910039 |
| C | −0.01088909 | −2.75178152 | −0.41060739 |
| C | 1.20146991  | −2.11168252 | −0.65511639 |
| C | 1.35084891  | −0.70890652 | −0.56363339 |
| C | 0.23987891  | 0.07036148  | −0.22397139 |
| H | −1.83916109 | 0.03237348  | 0.27592061  |
| H | −2.05471009 | −2.41787352 | 0.11250261  |
| H | −0.10424009 | −3.82911452 | −0.47993539 |
| H | 0.32541291  | 1.14799448  | −0.14448639 |
| C | 3.33757691  | −1.64400852 | −1.10917439 |
| C | 4.74770991  | −1.78855652 | −1.57842539 |
| C | 5.52567591  | −0.57243752 | −1.15415839 |
| C | 4.88988091  | 0.68072548  | −1.07394839 |
| C | 3.52368491  | 0.76435948  | −0.90607339 |
| C | 2.73714891  | −0.42476952 | −0.85892139 |
| H | 4.71496091  | −1.76503752 | −2.68280239 |
| H | 6.60133491  | −0.63665352 | −1.27306239 |
| H | 5.49533091  | 1.57617148  | −1.01606439 |
| H | 3.05236591  | 1.73054448  | −0.76592339 |
| O | 5.33206991  | −3.02740452 | −1.25515439 |
| H | 5.56045091  | −3.02323452 | −0.31532239 |
| N | 2.43430691  | −2.64746552 | −1.00575239 |
| H | 2.66305691  | −3.62504052 | −1.10448139 |
| O | 5.77158591  | −2.08365552 | 1.35049461  |
| O | 5.50927291  | −0.94559152 | 0.94365061  |

## TS20a

0 2

|   |             |             |             |
|---|-------------|-------------|-------------|
| C | 0.00000000  | −0.05882353 | 0.00000000  |
| C | 0.50741600  | −1.27682053 | 0.48399000  |
| C | −0.33362600 | −2.32199053 | 0.82755700  |
| C | −1.70355400 | −2.11714553 | 0.67196200  |
| C | −2.23295800 | −0.90428553 | 0.17853400  |
| C | −1.36152100 | 0.13720847  | −0.15453700 |
| H | 0.68870600  | 0.73802347  | −0.25221300 |
| H | 1.57808000  | −1.39962953 | 0.59434000  |

---

|   |             |             |             |
|---|-------------|-------------|-------------|
| H | 0.05816400  | -3.25872853 | 1.20620700  |
| H | -1.74672900 | 1.08146047  | -0.52229600 |
| C | -3.93320100 | -2.33587953 | 0.61840700  |
| C | -5.28827600 | -2.94420453 | 0.75601200  |
| C | -6.32925800 | -2.02154953 | 0.17812200  |
| C | -6.06094400 | -0.79007853 | -0.29564000 |
| C | -4.73182000 | -0.21636153 | -0.26840200 |
| C | -3.66747800 | -1.06922253 | 0.14085300  |
| H | -5.51010300 | -3.10996153 | 1.81801500  |
| H | -7.34166100 | -2.41008453 | 0.16956900  |
| H | -6.86708700 | -0.17770953 | -0.68357300 |
| H | -4.52539400 | 0.65641547  | -0.87458500 |
| O | -5.33841300 | -4.25257553 | 0.19007600  |
| H | -5.23546400 | -4.16250053 | -0.76354500 |
| N | -2.76727000 | -2.96521053 | 0.93828200  |
| H | -2.70224200 | -3.92716553 | 1.23286700  |
| O | -4.97111300 | 1.03642647  | 1.34539300  |
| O | -5.46200400 | 2.11977747  | 1.05245700  |

TS20s

O 2

|   |             |             |             |
|---|-------------|-------------|-------------|
| C | -0.26509572 | -0.84683357 | 0.00000000  |
| C | 0.04201028  | 0.49150643  | 0.29435400  |
| C | -0.93868072 | 1.46991343  | 0.30198300  |
| C | -2.24007072 | 1.07111143  | 0.00706000  |
| C | -2.57007772 | -0.26788357 | -0.29425700 |
| C | -1.56150572 | -1.23494457 | -0.29492300 |
| H | 0.52755128  | -1.58482657 | 0.00747500  |
| H | 1.06552328  | 0.76400443  | 0.52179700  |
| H | -0.70253672 | 2.50243443  | 0.53101200  |
| H | -1.79015472 | -2.27092357 | -0.51746400 |
| C | -4.45029272 | 1.00149443  | -0.35640600 |
| C | -5.86916172 | 1.44856743  | -0.46697800 |
| C | -6.75322572 | 0.27818743  | -0.81027300 |
| C | -6.30839672 | -0.98159157 | -0.96531300 |
| C | -4.93428172 | -1.33960757 | -0.69550100 |
| C | -3.99577772 | -0.29157157 | -0.53798900 |
| H | -5.95624072 | 2.20576743  | -1.25683600 |
| H | -7.80539672 | 0.51124943  | -0.93230200 |
| H | -7.00855172 | -1.77595757 | -1.19559600 |

---

|   |             |             |             |
|---|-------------|-------------|-------------|
| H | −4.60095672 | −2.35143057 | −0.88717200 |
| O | −6.29624472 | 2.11710043  | 0.71174600  |
| H | −6.26872572 | 1.45747243  | 1.41767200  |
| N | −3.40801372 | 1.81932843  | −0.05091900 |
| H | −3.50563472 | 2.78563543  | 0.21978600  |
| O | −5.57483572 | −0.65033657 | 1.86692500  |
| O | −5.27035472 | −1.71367957 | 1.33308200  |

#### TS21a

0 2

|   |             |             |             |
|---|-------------|-------------|-------------|
| C | −0.73637700 | −0.50810014 | 0.00000000  |
| C | −0.60035400 | −1.86420914 | −0.30712700 |
| C | −1.71159600 | −2.67334914 | −0.52664000 |
| C | −2.95994600 | −2.08022114 | −0.42647900 |
| C | −3.11786200 | −0.71869714 | −0.10829600 |
| C | −1.99568300 | 0.07406186  | 0.10075300  |
| H | 0.14901600  | 0.09247086  | 0.16662500  |
| H | 0.39004600  | −2.29790414 | −0.37595000 |
| H | −1.60300100 | −3.72456514 | −0.76366700 |
| H | −2.09992600 | 1.12454286  | 0.34625600  |
| C | −5.18153400 | −1.74730614 | −0.28318600 |
| C | −6.63086200 | −1.91223614 | −0.62978900 |
| C | −7.38540700 | −0.68031914 | −0.20804800 |
| C | −6.77649300 | 0.46997086  | 0.13939800  |
| C | −5.33326600 | 0.61913186  | 0.18486400  |
| C | −4.55379100 | −0.46338414 | −0.06809100 |
| H | −7.01133400 | −2.80210114 | −0.11655800 |
| H | −8.46622200 | −0.73777714 | −0.26495900 |
| H | −7.38179600 | 1.33443786  | 0.38793300  |
| H | −4.90255700 | 1.58580786  | 0.41600800  |
| O | −6.82404000 | −2.19543014 | −2.01364700 |
| H | −6.61849800 | −1.39848814 | −2.51370700 |
| N | −4.22745700 | −2.64467914 | −0.62544800 |
| H | −4.41136800 | −3.63256814 | −0.71940000 |
| O | −5.38070200 | −3.39940914 | 1.77609900  |
| O | −5.46145400 | −2.16729714 | 1.67828400  |

#### TS21s

0 2

---

|   |             |             |             |
|---|-------------|-------------|-------------|
| C | −0.27982326 | −0.06627393 | 0.00000000  |
| C | −0.38924926 | −1.40950993 | −0.37139000 |
| C | 0.73163074  | −2.16358493 | −0.70483100 |
| C | 1.96227874  | −1.52868793 | −0.65490600 |
| C | 2.09434974  | −0.18308793 | −0.27022400 |
| C | 0.96176174  | 0.55584807  | 0.05436600  |
| H | −1.17264526 | 0.49139007  | 0.25371600  |
| H | −1.36666126 | −1.87579793 | −0.40025600 |
| H | 0.64486874  | −3.20468593 | −0.99019300 |
| H | 1.04659574  | 1.59438407  | 0.35237600  |
| C | 4.17103574  | −1.12615093 | −0.63201900 |
| C | 5.60254074  | −1.19406293 | −1.05046500 |
| C | 6.34788974  | −0.00998093 | −0.49027100 |
| C | 5.72371874  | 1.09487507  | −0.04600800 |
| C | 4.27550574  | 1.20739707  | 0.00884300  |
| C | 3.51952574  | 0.12341307  | −0.29902100 |
| H | 5.63176174  | −1.12230393 | −2.14931600 |
| H | 7.42976974  | −0.06907593 | −0.53014300 |
| H | 6.31270874  | 1.93887507  | 0.29399600  |
| H | 3.82325474  | 2.13668307  | 0.33331000  |
| O | 6.19290774  | −2.44418993 | −0.76270000 |
| H | 6.17497274  | −2.55598393 | 0.19519700  |
| N | 3.23327974  | −2.03526393 | −0.97587100 |
| H | 3.44505174  | −3.02194593 | −1.03487600 |
| O | 3.84177274  | −2.75151193 | 1.49898600  |
| O | 4.47391274  | −1.69033093 | 1.34207100  |

TS22

0 2

|   |             |             |             |
|---|-------------|-------------|-------------|
| C | 0.74946473  | −0.07494647 | 0.00000000  |
| C | 0.40941673  | −1.42750747 | 0.15836900  |
| C | 1.37104973  | −2.42681247 | 0.13324700  |
| C | 2.69549373  | −2.04020547 | −0.05722800 |
| C | 3.05745273  | −0.68251547 | −0.22050900 |
| C | 2.06732973  | 0.30435753  | −0.19023100 |
| H | −0.03037727 | 0.67565853  | 0.02616000  |
| H | −0.62944627 | −1.69861147 | 0.30372500  |
| H | 1.10094973  | −3.46858247 | 0.25690400  |
| H | 2.32903373  | 1.34833853  | −0.31802600 |
| C | 4.94048873  | −2.00420547 | −0.33301800 |



---

|   |            |             |             |
|---|------------|-------------|-------------|
| C | 6.26439073 | −2.33470047 | −0.43153500 |
| C | 7.20643673 | −1.27978447 | −0.78725300 |
| C | 6.74262973 | 0.10176553  | −0.67801300 |
| C | 5.40924773 | 0.39591353  | −0.53619600 |
| C | 4.48503873 | −0.64879147 | −0.39399100 |
| H | 7.27027973 | −1.35866447 | −2.00382300 |
| H | 7.48848073 | 0.88236953  | −0.76011400 |
| H | 5.07567373 | 1.42688753  | −0.51260500 |
| N | 3.83613873 | −2.81613547 | −0.12141000 |
| H | 3.85768973 | −3.82073647 | −0.08060300 |
| H | 6.63062673 | −3.35213747 | −0.36224000 |
| O | 8.55353973 | −1.51372147 | −0.43965000 |
| H | 8.63417373 | −1.41417547 | 0.51343800  |
| O | 7.35820373 | −0.90427747 | −3.40948800 |
| O | 7.03863773 | 0.28253953  | −3.35639300 |

TS23a

0 2

|   |             |             |             |
|---|-------------|-------------|-------------|
| C | −0.01449275 | −0.27536232 | 0.00000000  |
| C | −0.37019675 | −1.62661332 | −0.05945900 |
| C | 0.57573025  | −2.62836532 | −0.25158500 |
| C | 1.90436625  | −2.24088132 | −0.37221900 |
| C | 2.28156925  | −0.88510032 | −0.29047000 |
| C | 1.31541325  | 0.10342168  | −0.12881500 |
| H | −0.78202075 | 0.47554568  | 0.13664400  |
| H | −1.41343375 | −1.90346632 | 0.03825400  |
| H | 0.28312625  | −3.66945732 | −0.31233700 |
| H | 1.59857525  | 1.14964268  | −0.10162000 |
| C | 4.16991825  | −2.22046932 | −0.55259000 |
| C | 5.46800425  | −2.54855332 | −0.52522500 |
| C | 6.51926025  | −1.47624032 | −0.45076600 |
| C | 5.96884925  | −0.09129832 | −0.21926500 |
| C | 4.66505825  | 0.20808068  | −0.23908000 |
| C | 3.70020825  | −0.82787232 | −0.55423400 |
| H | 7.08730325  | −1.46001732 | −1.38929200 |
| H | 6.71439125  | 0.66968868  | −0.01402000 |
| H | 4.31350625  | 1.21864068  | −0.06598700 |
| N | 3.03102725  | −3.02199832 | −0.58762200 |
| H | 3.04929425  | −4.02293632 | −0.48877100 |
| H | 5.81271825  | −3.57609532 | −0.54897000 |

---

|   |            |             |             |
|---|------------|-------------|-------------|
| O | 7.50157525 | −1.79089632 | 0.53402500  |
| H | 7.05290725 | −1.84379332 | 1.38407500  |
| O | 3.68218525 | −0.60920932 | −2.48875700 |
| O | 2.56882925 | −0.71061532 | −3.00786900 |

#### TS23s

0 2

|   |             |             |             |
|---|-------------|-------------|-------------|
| C | −0.98550723 | −0.05797101 | 0.00000000  |
| C | −1.34764823 | −1.40714601 | 0.07271300  |
| C | −0.39892723 | −2.42354201 | 0.10436100  |
| C | 0.93932377  | −2.05356301 | 0.04777400  |
| C | 1.31941377  | −0.69941101 | −0.05060200 |
| C | 0.35424477  | 0.30318599  | −0.05027800 |
| H | −1.75428023 | 0.70379399  | −0.00864600 |
| H | −2.39831723 | −1.67039901 | 0.11309100  |
| H | −0.69521423 | −3.46283701 | 0.17579300  |
| H | 0.64593077  | 1.34656899  | −0.09180900 |
| C | 3.20887177  | −2.06162201 | −0.08730800 |
| C | 4.49344277  | −2.39748601 | −0.25880600 |
| C | 5.53795077  | −1.32515301 | −0.40075800 |
| C | 4.97756577  | 0.06514199  | −0.57996500 |
| C | 3.68743577  | 0.37484199  | −0.41005200 |
| C | 2.76127677  | −0.66344601 | 0.00035500  |
| H | 6.17233077  | −1.55643201 | −1.26281700 |
| H | 5.70536777  | 0.83417699  | −0.81579100 |
| H | 3.32847477  | 1.39301999  | −0.50653100 |
| N | 2.07285177  | −2.85127301 | 0.07634500  |
| H | 2.06444977  | −3.85202201 | −0.02340200 |
| H | 4.82774377  | −3.42860601 | −0.26778000 |
| O | 6.44633277  | −1.33745101 | 0.70246800  |
| H | 5.92671877  | −1.16757901 | 1.49725400  |
| O | 3.05724677  | −0.50359401 | 1.91586000  |
| O | 2.04256677  | −0.59213001 | 2.61174000  |

#### TS24a

0 2

|   |             |             |             |
|---|-------------|-------------|-------------|
| C | −0.95619394 | −0.15942029 | −0.02503882 |
| C | −1.29261094 | −1.49725929 | 0.26344218  |
| C | −0.32309394 | −2.46929029 | 0.42805618  |

|   |             |             |             |
|---|-------------|-------------|-------------|
| C | 1.01084106  | −2.07674029 | 0.29492218  |
| C | 1.37064206  | −0.73449329 | 0.00678918  |
| C | 0.36199606  | 0.22851071  | −0.15408082 |
| H | −1.74719094 | 0.56992271  | −0.14784282 |
| H | −2.33676994 | −1.77044729 | 0.35746318  |
| H | −0.58809294 | −3.49663729 | 0.64803918  |
| H | 0.61650606  | 1.25819371  | −0.37760782 |
| C | 3.25470306  | −1.98726029 | 0.21531418  |
| C | 4.59921506  | −2.33071929 | 0.07301018  |
| C | 5.62585806  | −1.22475929 | 0.10439118  |
| C | 5.06060406  | 0.12438971  | −0.26268382 |
| C | 3.74198506  | 0.36593171  | −0.31902382 |
| C | 2.79713206  | −0.69757929 | −0.05550682 |
| H | 6.42543506  | −1.48806529 | −0.59396682 |
| H | 5.78245606  | 0.91687471  | −0.42263682 |
| H | 3.36972806  | 1.35622971  | −0.55641082 |
| N | 2.16234506  | −2.81790929 | 0.40136018  |
| H | 2.20768206  | −3.80401429 | 0.59649218  |
| H | 4.95767206  | −3.32716629 | 0.30573818  |
| O | 6.27590906  | −1.17203229 | 1.37708818  |
| H | 5.64555506  | −0.81666129 | 2.01251418  |
| O | 4.65632106  | −2.55161329 | −1.97680782 |
| O | 3.64603206  | −2.13013229 | −2.51981882 |

#### TS24s

0 2

|   |             |             |             |
|---|-------------|-------------|-------------|
| C | −0.43478260 | −0.15942029 | 0.00000000  |
| C | −0.80434660 | −1.51519229 | −0.10389800 |
| C | 0.14003340  | −2.51674729 | −0.23297800 |
| C | 1.48343740  | −2.13477029 | −0.25341900 |
| C | 1.87635440  | −0.77570229 | −0.15405700 |
| C | 0.89261740  | 0.21734971  | −0.02454300 |
| H | −1.20724460 | 0.59261171  | 0.10233900  |
| H | −1.85500060 | −1.77909929 | −0.08057800 |
| H | −0.15099260 | −3.55753129 | −0.30899600 |
| H | 1.17370240  | 1.26096671  | 0.05581700  |
| C | 3.72703840  | −2.07994329 | −0.35973700 |
| C | 5.06892740  | −2.43557429 | −0.23532500 |
| C | 6.09975940  | −1.35934229 | −0.44702700 |
| C | 5.58311640  | 0.02574971  | −0.14549100 |

---

|   |            |             |             |
|---|------------|-------------|-------------|
| C | 4.27414440 | 0.30498271  | −0.06336600 |
| C | 3.30365740 | −0.75717729 | −0.20330400 |
| H | 6.37694640 | −1.37714629 | −1.51380300 |
| H | 6.33888740 | 0.79655271  | −0.04571400 |
| H | 3.93137640 | 1.31512271  | 0.12949600  |
| N | 2.61623440 | −2.90458229 | −0.35889700 |
| H | 2.63645940 | −3.90707929 | −0.44340200 |
| H | 5.40765040 | −3.46062129 | −0.33248500 |
| O | 7.30560040 | −1.64954729 | 0.23240600  |
| H | 7.09895040 | −1.70727329 | 1.17159400  |
| O | 5.14086240 | −2.44276929 | 1.85992100  |
| O | 4.14552340 | −1.90139229 | 2.33666300  |

TS25a

0 2

|   |             |             |             |
|---|-------------|-------------|-------------|
| C | −0.11594203 | 0.10144927  | 0.00000000  |
| C | −0.41781503 | −1.26396473 | 0.06428300  |
| C | 0.57747597  | −2.23504473 | 0.05656000  |
| C | 1.89721097  | −1.80381373 | −0.01699400 |
| C | 2.21871797  | −0.43031373 | −0.07980000 |
| C | 1.20380797  | 0.52435227  | −0.07431400 |
| H | −0.91867703 | 0.82752727  | 0.00703900  |
| H | −1.45430403 | −1.57538873 | 0.12009100  |
| H | 0.33110997  | −3.28887973 | 0.10341700  |
| H | 1.44401197  | 1.58010927  | −0.12707300 |
| C | 4.17033397  | −1.70418573 | −0.10109900 |
| C | 5.48345197  | −1.99724373 | −0.06636900 |
| C | 6.48935997  | −0.88821573 | −0.09490800 |
| C | 5.89866997  | 0.46470527  | −0.39731800 |
| C | 4.52377597  | 0.72811127  | −0.24660700 |
| C | 3.66018697  | −0.33390673 | −0.15280100 |
| H | 7.24098097  | −1.08515973 | −0.87302800 |
| H | 6.60568597  | 1.28279627  | −0.31172500 |
| H | 4.15615097  | 1.74687727  | −0.27245100 |
| N | 3.06373997  | −2.54780373 | −0.04768100 |
| H | 3.11207897  | −3.54830873 | 0.03851300  |
| H | 5.85236397  | −3.01093173 | 0.03735400  |
| O | 7.25768997  | −0.84693573 | 1.11089900  |
| H | 6.64164197  | −0.77669473 | 1.84692200  |
| O | 7.10707297  | −0.12405673 | −2.77762500 |

|       |             |             |             |
|-------|-------------|-------------|-------------|
| O     | 6.05628097  | 0.38380527  | −2.39727500 |
| TS25s |             |             |             |
| 0 2   |             |             |             |
| C     | −0.50724637 | −0.51449276 | 0.00000000  |
| C     | −1.00170137 | −1.77735776 | 0.34505800  |
| C     | −0.16686137 | −2.88223476 | 0.47125600  |
| C     | 1.19093463  | −2.69247776 | 0.23903500  |
| C     | 1.70522563  | −1.42532076 | −0.10822800 |
| C     | 0.85029763  | −0.33256876 | −0.22656900 |
| H     | −1.18893937 | 0.32171224  | −0.08712300 |
| H     | −2.06408937 | −1.90024976 | 0.52034600  |
| H     | −0.56193137 | −3.85403576 | 0.74080900  |
| H     | 1.24159263  | 0.64348324  | −0.48949200 |
| C     | 3.43378263  | −2.99235376 | −0.01703700 |
| C     | 4.66974163  | −3.50457376 | −0.12417700 |
| C     | 5.79889563  | −2.59969176 | −0.53958100 |
| C     | 5.46000163  | −1.13772076 | −0.39977100 |
| C     | 4.14106263  | −0.68506076 | −0.54742000 |
| C     | 3.13745763  | −1.57381176 | −0.25731500 |
| H     | 6.00045663  | −2.77242776 | −1.60982000 |
| H     | 6.28958363  | −0.46212476 | −0.57534800 |
| H     | 3.93254463  | 0.37182924  | −0.66029800 |
| N     | 2.22527563  | −3.61017776 | 0.29040100  |
| H     | 2.12406563  | −4.58113676 | 0.52981600  |
| H     | 4.89000363  | −4.55762076 | 0.00439000  |
| O     | 7.02008663  | −2.92344476 | 0.09645300  |
| H     | 6.92183963  | −2.71286676 | 1.03128200  |
| O     | 4.50719263  | −1.14862176 | 2.17266300  |
| O     | 5.60638563  | −1.07811976 | 1.61236000  |
| TS26  |             |             |             |
| 0 2   |             |             |             |
| C     | −2.08015257 | 0.26717557  | 0.00000000  |
| C     | −2.27015757 | 1.68619057  | 0.32572300  |
| C     | −1.20459857 | 2.52515757  | 0.56144300  |
| C     | 0.07653043  | 1.97327257  | 0.56111300  |
| C     | 0.30670443  | 0.56243357  | 0.42482000  |
| C     | −0.74665657 | −0.28448843 | 0.24154900  |

---

|   |             |             |             |
|---|-------------|-------------|-------------|
| H | −2.16340157 | 0.30500657  | −1.19850000 |
| H | −3.28826457 | 2.04758857  | 0.38528100  |
| H | −0.62349857 | −1.35979943 | 0.17192000  |
| C | 2.30654743  | 1.64377857  | 0.77441800  |
| C | 3.67348243  | 1.82694257  | 0.94886500  |
| C | 4.47849143  | 0.69512157  | 0.91637600  |
| C | 3.93793243  | −0.58015843 | 0.71459400  |
| C | 2.57073443  | −0.75038243 | 0.53914200  |
| C | 1.74490643  | 0.36911857  | 0.57202100  |
| H | 4.09705743  | 2.81209057  | 1.10389000  |
| H | 5.54814343  | 0.80466857  | 1.04933000  |
| H | 4.59499743  | −1.44041943 | 0.69278100  |
| H | 2.15309843  | −1.73766943 | 0.37796900  |
| N | 1.28451743  | 2.58845157  | 0.76184700  |
| H | 1.41410443  | 3.58023157  | 0.87532900  |
| H | −1.36007757 | 3.57836557  | 0.76226800  |
| O | −3.16122657 | −0.58324643 | 0.32597600  |
| H | −3.19138957 | −0.67276843 | 1.28275300  |
| O | −2.55170057 | 0.97547657  | −2.51300600 |
| O | −2.78872257 | 2.12648557  | −2.13143000 |

TS27a

0 2

|   |             |             |             |
|---|-------------|-------------|-------------|
| C | −0.44927536 | −0.15942029 | 0.00000000  |
| C | −0.57884936 | 1.30277071  | 0.35012600  |
| C | 0.46584464  | 2.13086371  | 0.47200700  |
| C | 1.79018164  | 1.59997371  | 0.25961500  |
| C | 1.99699264  | 0.15943271  | 0.17828200  |
| C | 0.95647464  | −0.68007529 | 0.07265300  |
| H | −0.79409636 | −0.28294829 | −1.04089000 |
| H | −1.59014936 | 1.67246771  | 0.48665600  |
| H | 1.07737864  | −1.75595829 | 0.02060500  |
| C | 4.00408464  | 1.24454771  | 0.48338300  |
| C | 5.37169264  | 1.43715171  | 0.59547500  |
| C | 6.18669164  | 0.31441271  | 0.48227300  |
| C | 5.64927764  | −0.95727329 | 0.27054200  |
| C | 4.27393964  | −1.13483129 | 0.15734100  |
| C | 3.44788564  | −0.02369829 | 0.25881400  |
| H | 5.79174664  | 2.42191771  | 0.76025600  |
| H | 7.26095364  | 0.43234871  | 0.55992000  |

|       |             |             |             |
|-------|-------------|-------------|-------------|
| H     | 6.31156664  | −1.80996729 | 0.18913600  |
| H     | 3.85531464  | −2.11960129 | −0.01565800 |
| N     | 2.96971864  | 2.19154671  | 0.60311800  |
| H     | 3.13614564  | 3.17006771  | 0.40636300  |
| H     | 0.33954764  | 3.18171571  | 0.70492300  |
| O     | −1.25314036 | −0.97666729 | 0.84723500  |
| H     | −2.17638536 | −0.85867829 | 0.60976000  |
| O     | 1.89351564  | 1.98574071  | −1.79415300 |
| O     | 2.84064164  | 2.75662171  | −1.98607000 |
|       |             |             |             |
| TS27s |             |             |             |
| O 2   |             |             |             |
| C     | 0.08695652  | −0.66666666 | 0.00000000  |
| C     | −0.05601148 | 0.83395334  | 0.06491400  |
| C     | 0.96768952  | 1.67942134  | 0.23219200  |
| C     | 2.28741252  | 1.13045534  | 0.43753000  |
| C     | 2.51932852  | −0.30292266 | 0.29403100  |
| C     | 1.49945252  | −1.15646266 | 0.12927100  |
| H     | −0.29136948 | −0.99672366 | −0.98168400 |
| H     | −1.06525748 | 1.22100134  | −0.04196900 |
| H     | 1.65068052  | −2.22813266 | 0.06418300  |
| C     | 4.51855052  | 0.83444934  | 0.38074500  |
| C     | 5.88470852  | 1.05491934  | 0.44420900  |
| C     | 6.71275552  | −0.06419366 | 0.47630000  |
| C     | 6.18890252  | −1.35798966 | 0.43882500  |
| C     | 4.81401052  | −1.56394066 | 0.37677200  |
| C     | 3.97528352  | −0.45825666 | 0.35596100  |
| H     | 6.29335052  | 2.05755434  | 0.47258400  |
| H     | 7.78580752  | 0.07473634  | 0.53162200  |
| H     | 6.85990152  | −2.20740166 | 0.46414600  |
| H     | 4.40548652  | −2.56762366 | 0.35728300  |
| N     | 3.47814752  | 1.78262834  | 0.29161000  |
| H     | 3.59989652  | 2.70874434  | 0.68313300  |
| H     | 0.82217252  | 2.75279734  | 0.27516400  |
| O     | −0.67924548 | −1.31254766 | 1.01633500  |
| H     | −1.60805848 | −1.10077066 | 0.88639100  |
| O     | 2.21602052  | 1.16663634  | 2.49304400  |
| O     | 3.09092952  | 1.94401634  | 2.89224000  |

---

**TS28a**
**0 2**

|   |             |             |             |
|---|-------------|-------------|-------------|
| C | −0.44927536 | −0.33333333 | 0.00000000  |
| C | −0.93964936 | −1.59220233 | −0.38663000 |
| C | −0.08298136 | −2.63902033 | −0.68303200 |
| C | 1.28514864  | −2.39335833 | −0.58038100 |
| C | 1.79808264  | −1.13843733 | −0.18498200 |
| C | 0.91073564  | −0.09667333 | 0.10234500  |
| H | −1.15048536 | 0.46310367  | 0.21680200  |
| H | −2.00948836 | −1.74628333 | −0.45805700 |
| H | −0.46142436 | −3.60760333 | −0.98743700 |
| H | 1.28234564  | 0.87865367  | 0.39473200  |
| C | 3.52007964  | −2.55761533 | −0.57858500 |
| C | 4.88533064  | −3.14341133 | −0.71557600 |
| C | 5.91960064  | −2.15903833 | −0.23594300 |
| C | 5.63469464  | −0.90422533 | 0.16009100  |
| C | 4.29123564  | −0.36451233 | 0.13665200  |
| C | 3.23684564  | −1.26776033 | −0.17935600 |
| H | 5.08052764  | −3.37711433 | −1.77000800 |
| H | 6.94138664  | −2.52234633 | −0.23316300 |
| H | 6.43670864  | −0.24788133 | 0.47858200  |
| H | 4.08203664  | 0.54307667  | 0.68815200  |
| O | 4.98457764  | −4.40759333 | −0.06280100 |
| H | 4.91313364  | −4.25296233 | 0.88533100  |
| N | 2.36142464  | −3.23339033 | −0.82026600 |
| H | 2.31185064  | −4.21359533 | −1.05070500 |
| O | 4.45102764  | 0.77668567  | −1.56631400 |
| O | 4.93529764  | 1.88438067  | −1.36874100 |

**TS28s**
**0 2**

|   |             |             |             |
|---|-------------|-------------|-------------|
| C | 0.68115941  | −0.14492753 | 0.00000000  |
| C | 0.52655941  | 1.31186247  | 0.37329100  |
| C | 1.57692941  | 2.13495647  | 0.50970200  |
| C | 2.89891141  | 1.57488147  | 0.38969900  |
| C | 3.12716141  | 0.20446547  | 0.27348300  |
| C | 2.04319741  | −0.69322553 | 0.30504500  |
| H | 0.55875341  | −0.20493453 | −1.10049200 |
| H | −0.48771759 | 1.68320547  | 0.47432300  |
| H | 2.17865241  | −1.75688253 | 0.14932400  |



---

|   |             |             |            |
|---|-------------|-------------|------------|
| C | 5.13110441  | 1.30942647  | 0.40713400 |
| C | 6.50947041  | 1.50932647  | 0.44657500 |
| C | 7.31689841  | 0.38502947  | 0.38736300 |
| C | 6.76823041  | −0.90466653 | 0.28943300 |
| C | 5.39764241  | −1.09541953 | 0.24469400 |
| C | 4.55972541  | 0.02183647  | 0.30239900 |
| H | 6.93426941  | 2.50303947  | 0.52687800 |
| H | 8.39317241  | 0.50368247  | 0.41988800 |
| H | 7.43120341  | −1.76015953 | 0.25063600 |
| H | 4.97925241  | −2.09262553 | 0.17139800 |
| N | 4.09861641  | 2.23179347  | 0.46005500 |
| H | 4.21292741  | 3.22728647  | 0.55663300 |
| H | 1.44612041  | 3.18715147  | 0.73612300 |
| O | −0.29415159 | −0.97282253 | 0.60997000 |
| H | −1.14475359 | −0.80803353 | 0.19620600 |
| O | 1.85634341  | −0.99438553 | 2.37301300 |
| O | 1.62398541  | −2.15291753 | 2.68148000 |

TS29a

0 2

|   |             |             |             |
|---|-------------|-------------|-------------|
| C | −0.10144927 | −0.05797101 | 0.00000000  |
| C | −0.25449027 | 1.41709399  | 0.17183400  |
| C | 0.85191473  | 2.26467599  | 0.26875700  |
| C | 2.10745273  | 1.70146299  | 0.19070400  |
| C | 2.32497873  | 0.26217699  | 0.17067300  |
| C | 1.27484573  | −0.58223301 | 0.17553600  |
| H | −0.33512927 | −0.22876801 | −1.09227600 |
| H | −1.21945427 | 1.76118199  | 0.52018900  |
| H | 1.38813473  | −1.65919101 | 0.22934600  |
| C | 4.35334373  | 1.35001999  | 0.25843000  |
| C | 5.72755673  | 1.53451999  | 0.30751800  |
| C | 6.52616973  | 0.39411499  | 0.31505200  |
| C | 5.96846773  | −0.88553101 | 0.27288400  |
| C | 4.58814373  | −1.05520101 | 0.22226800  |
| C | 3.77472473  | 0.06997999  | 0.21886100  |
| H | 6.16450473  | 2.52526999  | 0.33932500  |
| H | 7.60318873  | 0.50527499  | 0.35259200  |
| H | 6.61747873  | −1.75214401 | 0.27764900  |
| H | 4.15533173  | −2.04824501 | 0.18491700  |
| N | 3.33515373  | 2.30581299  | 0.23594300  |

---

|   |             |             |             |
|---|-------------|-------------|-------------|
| H | 3.48160473  | 3.30129699  | 0.26457700  |
| H | 0.72051273  | 3.32647599  | 0.43628300  |
| O | −1.03438027 | −0.81272301 | 0.75855200  |
| H | −1.83016027 | −0.92571701 | 0.23210200  |
| O | −1.06607327 | 1.79509299  | −1.76513800 |
| O | −1.20683727 | 0.72722499  | −2.37769500 |

#### TS29s

0 2

|   |             |             |             |
|---|-------------|-------------|-------------|
| C | −0.05797101 | −0.08695652 | 0.00000000  |
| C | −0.18597301 | 1.35601148  | 0.40063300  |
| C | 0.90915399  | 2.21690048  | 0.33031800  |
| C | 2.16279099  | 1.63883048  | 0.33524900  |
| C | 2.36326099  | 0.19142948  | 0.37668400  |
| C | 1.31271999  | −0.64347852 | 0.28671300  |
| H | −0.16524901 | −0.10922452 | −1.10169500 |
| H | −1.19521201 | 1.74945648  | 0.40892600  |
| H | 1.41535999  | −1.72288752 | 0.31361400  |
| C | 4.39745399  | 1.26443848  | 0.52441800  |
| C | 5.76823199  | 1.43938548  | 0.64116800  |
| C | 6.55129899  | 0.29356748  | 0.75294200  |
| C | 5.98194299  | −0.98125152 | 0.74424300  |
| C | 4.60444599  | −1.14083652 | 0.62483300  |
| C | 3.80681399  | −0.01002952 | 0.51882900  |
| H | 6.21444299  | 2.42643748  | 0.64670800  |
| H | 7.62568799  | 0.39673348  | 0.84755300  |
| H | 6.61943899  | −1.85197352 | 0.83108700  |
| H | 4.16175999  | −2.13013552 | 0.61991600  |
| N | 3.39442799  | 2.22964048  | 0.39348000  |
| H | 3.54645399  | 3.22279348  | 0.45979300  |
| H | 0.78409499  | 3.28722948  | 0.43786900  |
| O | −1.10524801 | −0.89497752 | 0.47783600  |
| H | −1.14819701 | −0.80279852 | 1.43983900  |
| O | −0.08811101 | 1.05565248  | 2.52986900  |
| O | −0.75125401 | 0.14940748  | 3.06336600  |

#### TS30

0 2

|   |             |            |            |
|---|-------------|------------|------------|
| C | −1.27862589 | 0.03816794 | 0.00000000 |
|---|-------------|------------|------------|

---

|   |             |             |             |
|---|-------------|-------------|-------------|
| C | -1.06912389 | -1.30679606 | 0.16488500  |
| C | -2.13800089 | -2.22755206 | 0.24143000  |
| C | -3.43212189 | -1.73042606 | 0.16499600  |
| C | -3.70038189 | -0.35509406 | -0.00319700 |
| C | -2.61323289 | 0.56795394  | -0.25597000 |
| H | -0.45159889 | 0.73700394  | -0.04270300 |
| H | -0.05629689 | -1.67777506 | 0.26658800  |
| H | -2.64716589 | 0.57166494  | -1.48815600 |
| C | -5.67157389 | -1.47297406 | 0.24614700  |
| C | -7.04649489 | -1.67289106 | 0.34582100  |
| C | -7.86204489 | -0.55591106 | 0.24805900  |
| C | -7.33200789 | 0.73084494  | 0.05439300  |
| C | -5.96603689 | 0.92916494  | -0.04191500 |
| C | -5.11983689 | -0.18228606 | 0.05996600  |
| H | -7.46462989 | -2.66225306 | 0.48830900  |
| H | -8.93606789 | -0.68061506 | 0.31978900  |
| H | -8.00610789 | 1.57467594  | -0.02321200 |
| H | -5.54591889 | 1.91475694  | -0.20050400 |
| N | -4.63954789 | -2.38917906 | 0.29492000  |
| H | -4.74707289 | -3.37874906 | 0.43950100  |
| H | -1.94742089 | -3.28337106 | 0.38798700  |
| O | -2.84016589 | 1.92708194  | 0.03467800  |
| H | -2.85308889 | 2.02602794  | 0.99173400  |
| O | -3.09650589 | 0.22374494  | -2.83520200 |
| O | -3.84779489 | -0.73321206 | -2.64150400 |

TS31a

02

|   |             |             |             |
|---|-------------|-------------|-------------|
| C | 0.17391304  | -0.53623188 | 0.00000000  |
| C | 0.38948004  | -1.85645588 | 0.14933000  |
| C | -0.67875596 | -2.82373788 | 0.32207500  |
| C | -1.95748196 | -2.37774188 | 0.24798200  |
| C | -2.25305396 | -1.00152088 | -0.09877700 |
| C | -1.20294896 | 0.06654912  | 0.00230000  |
| H | 1.00412804  | 0.15636712  | -0.07278900 |
| H | 1.40771004  | -2.22825488 | 0.16949400  |
| H | -1.33125696 | 0.72719412  | -0.86586700 |
| C | -4.20807996 | -2.11789388 | 0.34658900  |
| C | -5.57410396 | -2.31085688 | 0.50513500  |
| C | -6.39497296 | -1.19241788 | 0.38836400  |

---

|   |             |             |             |
|---|-------------|-------------|-------------|
| C | −5.88033596 | 0.08129012  | 0.12296500  |
| C | −4.51288396 | 0.26818712  | −0.03634900 |
| C | −3.67581396 | −0.83835288 | 0.07830900  |
| H | −5.98904096 | −3.29048688 | 0.70897900  |
| H | −7.46494496 | −1.31505188 | 0.51062100  |
| H | −6.55549196 | 0.92377612  | 0.04537300  |
| H | −4.09343396 | 1.24772512  | −0.23188400 |
| N | −3.16850596 | −3.03481888 | 0.41239700  |
| H | −3.26417496 | −3.98809988 | 0.71826600  |
| H | −0.44276396 | −3.86093088 | 0.52496600  |
| O | −1.40437596 | 0.92622312  | 1.12091200  |
| H | −1.21740796 | 0.42425912  | 1.92050800  |
| O | −2.11099696 | −1.24186288 | −2.03791200 |
| O | −2.33645296 | −0.19445988 | −2.64334400 |

TS31s

02

|   |             |             |             |
|---|-------------|-------------|-------------|
| C | −0.14492753 | −0.24637681 | 0.00000000  |
| C | 0.05831547  | −1.55133781 | 0.24276100  |
| C | −1.03129353 | −2.50926981 | 0.34996900  |
| C | −2.30138253 | −2.03704281 | 0.32886200  |
| C | −2.57746153 | −0.60908381 | 0.27702900  |
| C | −1.52214053 | 0.31148219  | −0.25315200 |
| H | 0.68018247  | 0.44901519  | −0.10092400 |
| H | 1.06909147  | −1.92422381 | 0.36133000  |
| H | −1.66274353 | 0.35411419  | −1.34599500 |
| C | −4.55395553 | −1.76356381 | 0.35172100  |
| C | −5.92674853 | −1.96191981 | 0.40503200  |
| C | −6.73885253 | −0.83577181 | 0.29468700  |
| C | −6.21017653 | 0.45026519  | 0.14556300  |
| C | −4.83482053 | 0.64458019  | 0.10132900  |
| C | −4.00566753 | −0.47161481 | 0.18657000  |
| H | −6.35353753 | −2.94951381 | 0.53102500  |
| H | −7.81458453 | −0.96355581 | 0.33100800  |
| H | −6.87988953 | 1.29777019  | 0.07648000  |
| H | −4.40054753 | 1.63186919  | 0.00213300  |
| N | −3.52121253 | −2.68463381 | 0.44154000  |
| H | −3.63874953 | −3.67446781 | 0.57373600  |
| H | −0.81606253 | −3.56378081 | 0.46852600  |
| O | −1.68622753 | 1.64797919  | 0.17306300  |

---

|   |             |             |            |
|---|-------------|-------------|------------|
| H | −1.62066853 | 1.66560019  | 1.13409100 |
| O | −2.28518653 | −0.28771481 | 2.20456800 |
| O | −3.11326553 | 0.49838919  | 2.68700000 |

#### TS32a

0 2

|   |             |             |             |
|---|-------------|-------------|-------------|
| C | −0.36231884 | −0.04347826 | 0.00000000  |
| C | −0.17770184 | −1.36098426 | 0.45872400  |
| C | −1.25440184 | −2.20270626 | 0.54370000  |
| C | −2.56556984 | −1.65238626 | 0.37388600  |
| C | −2.80828884 | −0.31259126 | 0.17824900  |
| C | −1.69568084 | 0.67298174  | 0.09281900  |
| H | 0.50612616  | 0.60119774  | −0.09375500 |
| H | 0.82553716  | −1.74827226 | 0.58205200  |
| H | −1.81374384 | 1.28898574  | −0.80911200 |
| C | −4.79439584 | −1.42998026 | 0.26425300  |
| C | −6.17553584 | −1.63547826 | 0.23699300  |
| C | −6.98069284 | −0.52444226 | 0.06691100  |
| C | −6.43335684 | 0.76677774  | −0.07197700 |
| C | −5.06786284 | 0.96866574  | −0.04659300 |
| C | −4.22351284 | −0.14019126 | 0.11791900  |
| H | −6.60049584 | −2.62629526 | 0.34757800  |
| H | −8.05664284 | −0.64878926 | 0.04314700  |
| H | −7.10075184 | 1.61061074  | −0.19671900 |
| H | −4.64849584 | 1.96342574  | −0.14126800 |
| N | −3.76596884 | −2.33056826 | 0.42375200  |
| H | −3.86975684 | −3.32705426 | 0.51733100  |
| H | −1.12794184 | −3.25329726 | 0.77879300  |
| O | −1.74757484 | 1.52011874  | 1.24444000  |
| H | −1.16938684 | 2.27410874  | 1.09687500  |
| O | −0.57955684 | −0.41973726 | −1.99339400 |
| O | −0.86784284 | −1.57900726 | −2.24932500 |

#### TS32s

0 2

|   |             |             |            |
|---|-------------|-------------|------------|
| C | 0.89855071  | 0.13043478  | 0.00000000 |
| C | 1.10479471  | −1.26022422 | 0.07961000 |
| C | 0.03702271  | −2.09063422 | 0.30345300 |
| C | −1.28341429 | −1.54005622 | 0.25141800 |

---

|   |             |             |             |
|---|-------------|-------------|-------------|
| C | −1.54047529 | −0.22418922 | −0.06126300 |
| C | −0.42979529 | 0.71155278  | −0.42043700 |
| H | 1.74692671  | 0.79605678  | −0.11324800 |
| H | 2.11326271  | −1.64477722 | 0.16342000  |
| H | −0.39694529 | 0.82338478  | −1.51592400 |
| C | −3.51064429 | −1.29934622 | 0.33530300  |
| C | −4.88739529 | −1.48394022 | 0.48225000  |
| C | −5.70249629 | −0.39033922 | 0.25693100  |
| C | −5.17038629 | 0.86369378  | −0.10526800 |
| C | −3.80983629 | 1.04904278  | −0.24574200 |
| C | −2.95511729 | −0.04467422 | −0.02578400 |
| H | −5.30043729 | −2.44588922 | 0.76203800  |
| H | −6.77535529 | −0.49943922 | 0.36206500  |
| H | −5.84630629 | 1.69355978  | −0.27114700 |
| H | −3.39457329 | 2.01309978  | −0.51363300 |
| N | −2.47554729 | −2.19327822 | 0.48718300  |
| H | −2.56776029 | −3.14917822 | 0.78791000  |
| H | 0.18345071  | −3.14625522 | 0.50179000  |
| O | −0.61892129 | 2.02932778  | 0.05702600  |
| H | −0.64300929 | 1.98760378  | 1.01919700  |
| O | 0.64478671  | 0.49277978  | 2.01151300  |
| O | 0.35248271  | −0.51028722 | 2.65663900  |

TS33a

0 2

|   |             |             |             |
|---|-------------|-------------|-------------|
| C | 0.52173912  | 0.17391304  | 0.00000000  |
| C | 0.72886812  | −1.14606796 | 0.14913100  |
| C | −0.36391888 | −2.09106096 | 0.20518700  |
| C | −1.66980188 | −1.53400396 | 0.22471000  |
| C | −1.92870488 | −0.18536896 | 0.08946400  |
| C | −0.84168188 | 0.81039604  | −0.11698600 |
| H | 1.36976112  | 0.85108704  | −0.04340500 |
| H | 1.73896812  | −1.53149796 | 0.22148200  |
| H | −0.93320788 | 1.21409804  | −1.13953200 |
| C | −3.89702988 | −1.31839296 | 0.29142300  |
| C | −5.27695488 | −1.52844196 | 0.35772700  |
| C | −6.09356888 | −0.41625396 | 0.28096500  |
| C | −5.56136488 | 0.88323104  | 0.14792900  |
| C | −4.19930788 | 1.09204404  | 0.08290000  |
| C | −3.34345788 | −0.02057996 | 0.14218900  |

---

|   |             |             |             |
|---|-------------|-------------|-------------|
| H | −5.69014788 | −2.52397196 | 0.46853000  |
| H | −7.16825888 | −0.54488096 | 0.32989600  |
| H | −6.23866688 | 1.72720704  | 0.10243800  |
| H | −3.78402588 | 2.08883304  | −0.00238200 |
| N | −2.86051488 | −2.21916896 | 0.36034100  |
| H | −2.94749388 | −3.22025796 | 0.28391900  |
| H | −0.19041588 | −3.08473296 | 0.59733100  |
| O | −1.01260388 | 1.88249704  | 0.80931300  |
| H | −0.43285188 | 2.60562604  | 0.55434400  |
| O | −0.34410288 | −2.93702696 | −1.67645000 |
| O | −1.30260088 | −3.69211896 | −1.80568500 |

TS33s

0 2

|   |             |             |             |
|---|-------------|-------------|-------------|
| C | −0.27536231 | −0.20289855 | 0.00000000  |
| C | −0.05790031 | −1.52321855 | 0.12667700  |
| C | −1.14366331 | −2.47555755 | 0.21689800  |
| C | −2.45511531 | −1.93641655 | 0.12219900  |
| C | −2.72261931 | −0.58859855 | 0.00435600  |
| C | −1.64077231 | 0.42325545  | −0.14988700 |
| H | 0.56858569  | 0.48057045  | −0.02616000 |
| H | 0.95484669  | −1.90151755 | 0.20220900  |
| H | −1.70133431 | 0.85660045  | −1.16257600 |
| C | −4.68463431 | −1.74093155 | 0.14702900  |
| C | −6.06290631 | −1.96086755 | 0.21352600  |
| C | −6.88759931 | −0.85485455 | 0.13250700  |
| C | −6.36509431 | 0.44756445  | −0.00874200 |
| C | −5.00428431 | 0.66671945  | −0.06716800 |
| C | −4.14012631 | −0.43815955 | 0.01052900  |
| H | −6.46896931 | −2.95933255 | 0.32395000  |
| H | −7.96135031 | −0.99111255 | 0.18117900  |
| H | −7.04869931 | 1.28598945  | −0.06197600 |
| H | −4.59668531 | 1.66688845  | −0.14992000 |
| N | −3.64248231 | −2.63822855 | 0.18439000  |
| H | −3.70932031 | −3.60085955 | 0.47645600  |
| H | −0.96210431 | −3.52039555 | 0.00076600  |
| O | −1.85741831 | 1.46585845  | 0.79987800  |
| H | −1.24755731 | 2.18500845  | 0.61255400  |
| O | −1.10099231 | −3.00358955 | 2.20121500  |
| O | −2.00431431 | −3.79772055 | 2.44452500  |

---

TS34

0 2

|   |             |             |             |
|---|-------------|-------------|-------------|
| C | −0.38291604 | −0.55223543 | −0.00722916 |
| C | −0.11789804 | 0.82509757  | 0.05965284  |
| C | −1.11967204 | 1.76101257  | −0.14326916 |
| C | −2.39511004 | 1.27836757  | −0.42142216 |
| C | −2.68511804 | −0.10224543 | −0.49174116 |
| C | −1.65646204 | −1.02449143 | −0.27754116 |
| H | 0.42411096  | −1.25501443 | 0.15942684  |
| H | 0.88809596  | 1.16309157  | 0.27609084  |
| H | −0.91696404 | 2.82392457  | −0.08899416 |
| H | −1.85308204 | −2.08946143 | −0.31758316 |
| C | −4.57814904 | 1.08293857  | −0.86965716 |
| C | −5.97573904 | 1.44744657  | −1.25892816 |
| C | −6.89757304 | 0.30236757  | −0.84703116 |
| C | −6.33717204 | −1.11321443 | −1.02145416 |
| C | −4.97378204 | −1.31612243 | −0.98058716 |
| C | −4.09889804 | −0.21267143 | −0.77427016 |
| H | −6.02184504 | 1.59231957  | −2.34458416 |
| H | −7.88552604 | 0.42077157  | −1.30212016 |
| H | −6.99676404 | −1.89314843 | −1.37415016 |
| H | −4.57711804 | −2.32174443 | −1.05771316 |
| O | −6.38649004 | 2.66773057  | −0.67872616 |
| H | −6.55071004 | 2.49775057  | 0.25805484  |
| N | −3.57538704 | 1.96969957  | −0.66846816 |
| H | −3.70367504 | 2.97033857  | −0.65202816 |
| O | −7.00183504 | −1.04368143 | 0.82007384  |
| O | −6.98366504 | 0.34745857  | 0.56957484  |

## TS35

0 2

|   |             |             |             |
|---|-------------|-------------|-------------|
| C | −0.19145802 | 0.27245950  | 0.00000000  |
| C | 0.08466398  | 1.65063350  | −0.02460500 |
| C | −0.90807402 | 2.57721950  | −0.29329300 |
| C | −2.18993102 | 2.08835150  | −0.53832000 |
| C | −2.49015602 | 0.70661350  | −0.51759200 |
| C | −1.46593002 | −0.20734950 | −0.24343400 |
| H | 0.61019598  | −0.42301250 | 0.21636200  |



---

|   |             |             |             |
|---|-------------|-------------|-------------|
| H | 1.09295298  | 1.99427550  | 0.17141400  |
| H | -0.69680102 | 3.63983050  | -0.31160800 |
| H | -1.66892302 | -1.27156050 | -0.21471900 |
| C | -4.37262902 | 1.87253650  | -0.97857000 |
| C | -5.80625002 | 2.22715450  | -1.24978600 |
| C | -6.63052802 | 0.99048550  | -0.87032200 |
| C | -6.07598902 | -0.29647050 | -1.42729300 |
| C | -4.79002502 | -0.53097550 | -0.94705300 |
| C | -3.89659202 | 0.59408750  | -0.80591200 |
| H | -5.95730602 | 2.49008950  | -2.30252100 |
| H | -7.69019902 | 1.14400850  | -1.08111800 |
| H | -6.73187502 | -1.09623150 | -1.73822800 |
| H | -4.38897202 | -1.53844150 | -0.94219500 |
| O | -6.21013702 | 3.35284850  | -0.49898800 |
| H | -6.20739902 | 3.08158450  | 0.42884900  |
| N | -3.36199402 | 2.76923650  | -0.83022400 |
| H | -3.49142702 | 3.76925150  | -0.81888500 |
| O | -5.88704902 | -0.43229350 | 0.78028200  |
| O | -6.43669202 | 0.85103150  | 0.55327600  |

TS36

02

|   |             |             |             |
|---|-------------|-------------|-------------|
| C | -1.68893132 | -0.57251908 | 0.00000000  |
| C | -1.47106132 | 0.80221492  | 0.17176600  |
| C | -2.50796532 | 1.72017092  | 0.05578600  |
| C | -3.76879532 | 1.22283692  | -0.24093400 |
| C | -4.01375832 | -0.16097708 | -0.41149800 |
| C | -2.95213732 | -1.06336308 | -0.28778700 |
| H | -0.85686632 | -1.25823608 | 0.10003400  |
| H | -0.47402032 | 1.15736092  | 0.40207600  |
| H | -2.33620632 | 2.78110992  | 0.19138800  |
| H | -3.11777632 | -2.12751808 | -0.40850200 |
| C | -5.96948732 | 1.00356792  | -0.61816600 |
| C | -7.32827932 | 1.30542292  | -1.17692500 |
| C | -8.17783832 | 0.14302792  | -0.67486600 |
| C | -7.60939732 | -1.19737008 | -1.06194200 |
| C | -6.27187032 | -1.39663208 | -0.99784600 |
| C | -5.41567032 | -0.29846408 | -0.68317200 |
| H | -7.28815332 | 1.29347592  | -2.27025300 |
| H | -9.22476632 | 0.26536592  | -0.95079100 |

---

|   |             |             |             |
|---|-------------|-------------|-------------|
| H | −8.29016532 | −2.01678208 | −1.25367700 |
| H | −5.84776732 | −2.38104008 | −1.16231600 |
| O | −7.80766432 | 2.55738192  | −0.77390600 |
| H | −7.85595732 | 2.52109692  | 0.19193000  |
| N | −4.96992632 | 1.90151892  | −0.43582900 |
| H | −5.12242832 | 2.89196492  | −0.32581300 |
| O | −6.94071332 | 0.83451792  | 1.14854000  |
| O | −8.12240632 | 0.20539292  | 0.77181900  |

TS37

0 2

|   |             |             |             |
|---|-------------|-------------|-------------|
| C | −1.39312969 | −0.22900763 | 0.00000000  |
| C | −1.15567169 | 1.11309837  | 0.35441500  |
| C | −2.19696769 | 1.99127837  | 0.58794500  |
| C | −3.49585969 | 1.49276537  | 0.46559100  |
| C | −3.75765769 | 0.15115837  | 0.10023300  |
| C | −2.67942669 | −0.71533363 | −0.13079600 |
| H | −0.55036269 | −0.88613663 | −0.17582900 |
| H | −0.13513969 | 1.46437237  | 0.44622500  |
| H | −2.01227169 | 3.02358137  | 0.86064200  |
| H | −2.85409569 | −1.74742363 | −0.41221800 |
| C | −5.71364769 | 1.23994537  | 0.37540000  |
| C | −7.15967269 | 1.34819537  | 0.62579300  |
| C | −7.87150869 | 0.33603737  | −0.30331800 |
| C | −7.36562469 | −1.06320363 | −0.15586600 |
| C | −6.03260569 | −1.18406263 | −0.06555300 |
| C | −5.18779869 | 0.00381037  | 0.05230200  |
| H | −8.03738669 | 2.21163237  | 0.16197200  |
| H | −7.66204669 | 0.68697337  | −1.32487100 |
| H | −8.04036869 | −1.90587163 | −0.23250400 |
| H | −5.56079269 | −2.15967263 | −0.04774800 |
| O | −7.44125669 | 1.25876037  | 1.96741500  |
| H | −8.39389869 | 1.11650137  | 2.06646700  |
| N | −4.70803169 | 2.12555937  | 0.64757600  |
| H | −4.83846869 | 3.08661237  | 0.91798100  |
| O | −9.29119169 | 1.97948137  | −0.22299600 |
| O | −9.22256969 | 0.59788137  | −0.00774500 |

TS38

---

0 2

|   |             |             |             |
|---|-------------|-------------|-------------|
| C | 0.71564888  | −0.30534351 | 0.00000000  |
| C | 0.89860988  | 1.08818349  | 0.04770400  |
| C | −0.15673912 | 1.95779849  | −0.16581300 |
| C | −1.40533512 | 1.39893949  | −0.43562300 |
| C | −1.61377612 | −0.00160651 | −0.48507300 |
| C | −0.52599212 | −0.85599351 | −0.26140000 |
| H | 1.56406388  | −0.95590851 | 0.17421700  |
| H | 1.88349288  | 1.48854549  | 0.25534500  |
| H | −0.01660012 | 3.03175549  | −0.12858400 |
| H | −0.65680512 | −1.93168051 | −0.28901100 |
| C | −3.56628012 | 1.05112049  | −0.87036200 |
| C | −4.98343412 | 1.29004849  | −1.28247600 |
| C | −5.84586312 | 0.10866649  | −0.82019900 |
| C | −5.18894712 | −1.23636351 | −1.03068300 |
| C | −3.85634512 | −1.36517651 | −0.95489300 |
| C | −3.01274312 | −0.19590151 | −0.76422600 |
| H | −5.02110212 | 1.30202449  | −2.37877800 |
| H | −6.82273512 | 0.17265349  | −1.31158300 |
| H | −5.83303412 | −2.09777651 | −1.14695700 |
| H | −3.39721412 | −2.34486451 | −1.03530900 |
| O | −5.48503912 | 2.53619749  | −0.85400700 |
| H | −5.73787912 | 2.44047249  | 0.07135800  |
| N | −2.61897612 | 2.01374849  | −0.68803900 |
| H | −2.80609512 | 3.00399649  | −0.69710800 |
| O | −7.00250012 | −0.53711251 | 1.07041400  |
| O | −6.06120112 | 0.36237349  | 0.58356100  |
| O | −9.00423212 | 0.71828149  | 0.70771800  |
| H | −8.91269612 | 1.29062849  | 1.48682000  |
| H | −7.88965912 | −0.19324851 | 0.70688800  |

TS39

0 2

|   |             |             |             |
|---|-------------|-------------|-------------|
| C | −0.08838605 | −0.33134883 | 0.00318073  |
| C | −0.34518505 | −1.70287583 | −0.17438627 |
| C | 0.68471095  | −2.62337883 | −0.25110927 |
| C | 1.98718695  | −2.13627483 | −0.14127627 |
| C | 2.26799295  | −0.76297383 | 0.03858173  |
| C | 1.20519995  | 0.14625717  | 0.10780673  |
| H | −0.92111005 | 0.35905117  | 0.05727873  |

---

|   |             |             |             |
|---|-------------|-------------|-------------|
| H | −1.36974805 | −2.04521383 | −0.25350227 |
| H | 0.48675995  | −3.67958683 | −0.39002927 |
| H | 1.39303495  | 1.20537817  | 0.24145973  |
| C | 4.21177295  | −1.91440783 | −0.03554027 |
| C | 5.66000195  | −2.25596183 | 0.06930873  |
| C | 6.47100595  | −0.96836483 | −0.10146727 |
| C | 5.91903495  | 0.31030217  | 0.32257973  |
| C | 4.57550795  | 0.47473217  | 0.36575173  |
| C | 3.70259195  | −0.64405283 | 0.11025773  |
| H | 5.96570695  | −2.96178183 | −0.71252127 |
| H | 6.73508795  | −0.90724883 | −1.34323427 |
| H | 6.61629395  | 1.11255917  | 0.52657773  |
| H | 4.14834495  | 1.43702117  | 0.62413373  |
| O | 5.89221895  | −2.82514283 | 1.34645773  |
| H | 6.84625795  | −2.93475683 | 1.44044273  |
| N | 3.19479595  | −2.81022983 | −0.18634927 |
| H | 3.30791495  | −3.81041183 | −0.23252027 |
| O | 8.08148695  | −1.24961183 | −1.28979827 |
| O | 7.82376195  | −1.18531383 | 0.13845573  |

TS40

02

|   |             |             |             |
|---|-------------|-------------|-------------|
| C | −0.12847967 | −0.35331905 | 0.00000000  |
| C | 0.22653733  | 0.97904495  | −0.28008600 |
| C | −0.72385267 | 1.98325395  | −0.31937300 |
| C | −2.04793467 | 1.62338595  | −0.06454900 |
| C | −2.42710367 | 0.29005095  | 0.21684800  |
| C | −1.44268567 | −0.70611605 | 0.24506600  |
| H | 0.64403333  | −1.11219805 | 0.02169300  |
| H | 1.26492833  | 1.22262395  | −0.46967200 |
| H | −0.45042467 | 3.00901595  | −0.53746800 |
| H | −1.70688767 | −1.73627905 | 0.45514800  |
| C | −4.26561367 | 1.60317295  | 0.24724400  |
| C | −5.65253167 | 2.08580595  | 0.54160800  |
| C | −6.57234167 | 0.89169495  | 0.35639200  |
| C | −6.12108067 | −0.43113305 | 0.81706200  |
| C | −4.80303667 | −0.72264905 | 0.80219000  |
| C | −3.85372467 | 0.30218195  | 0.41931800  |
| H | −5.96106767 | 2.88795495  | −0.13284500 |
| H | −6.88547867 | −1.15730505 | 1.06271100  |

---

|   |             |             |             |
|---|-------------|-------------|-------------|
| H | −4.45196867 | −1.70533005 | 1.09316800  |
| O | −5.72352167 | 2.66537495  | 1.83890200  |
| H | −5.46061367 | 1.99535495  | 2.47983200  |
| N | −3.18982767 | 2.40042095  | −0.03923100 |
| H | −3.21988267 | 3.40332595  | −0.12762000 |
| O | −8.74899667 | 0.24704995  | 0.23638400  |
| O | −7.87776567 | 1.24341295  | 0.56503400  |
| O | −7.50141767 | −0.06826905 | −1.81106900 |
| H | −6.73214367 | 0.51147695  | −0.95396300 |
| H | −8.24190167 | −0.07901005 | −1.02280900 |
| H | −7.79562367 | 0.53358695  | −2.50350100 |

TS41

02

|   |             |             |             |
|---|-------------|-------------|-------------|
| C | −0.85419732 | −0.21354933 | 0.00000000  |
| C | −0.97658832 | −1.61403233 | −0.04498100 |
| C | 0.11357968  | −2.42292333 | −0.31456100 |
| C | 1.33673068  | −1.79431733 | −0.54212200 |
| C | 1.48220268  | −0.38583633 | −0.50728000 |
| C | 0.36091368  | 0.40633867  | −0.22569000 |
| H | −1.72952932 | 0.38572867  | 0.21891600  |
| H | −1.94281032 | −2.06876833 | 0.13673100  |
| H | 0.02032068  | −3.50196133 | −0.34490500 |
| H | 0.44524368  | 1.48615467  | −0.18325900 |
| C | 3.47757868  | −1.33328433 | −0.96472100 |
| C | 4.91207068  | −1.51441633 | −1.31434100 |
| C | 5.73901268  | −0.28269133 | −0.59998500 |
| C | 5.01741668  | 1.02174467  | −0.73806300 |
| C | 3.67545968  | 1.08684667  | −0.77617300 |
| C | 2.87018668  | −0.11505133 | −0.77108100 |
| H | 5.07617368  | −1.25413733 | −2.37678300 |
| H | 6.73122768  | −0.31087733 | −1.05450700 |
| H | 5.62409668  | 1.91801367  | −0.77275000 |
| H | 3.18723768  | 2.05483367  | −0.82053200 |
| O | 5.45281768  | −2.68696133 | −0.97575200 |
| H | 6.16271768  | −2.42133533 | 0.07702300  |
| N | 2.57786268  | −2.33964933 | −0.82505300 |
| H | 2.81778268  | −3.31848733 | −0.87120500 |
| O | 6.61884068  | −1.77085433 | 0.84830300  |
| O | 5.83578168  | −0.64645933 | 0.74260600  |

TS42

0 2

|   |              |             |             |
|---|--------------|-------------|-------------|
| C | -1.32165603  | -0.28662419 | 0.00000000  |
| C | -1.18030803  | 1.10692081  | 0.12458800  |
| C | -2.26975403  | 1.95248181  | 0.00518100  |
| C | -3.51098403  | 1.36976181  | -0.24511500 |
| C | -3.67651503  | -0.03229219 | -0.37600600 |
| C | -2.55513103  | -0.86206519 | -0.24595400 |
| H | -0.44671603  | -0.91744219 | 0.09946800  |
| H | -0.20065203  | 1.52679381  | 0.31798100  |
| H | -2.16214303  | 3.02629181  | 0.10346000  |
| H | -2.65260903  | -1.93808219 | -0.33512400 |
| C | -5.67222603  | 0.98458681  | -0.62498100 |
| C | -7.11383203  | 1.22341381  | -0.89974900 |
| C | -7.93597203  | -0.06108619 | -0.30939800 |
| C | -7.24964203  | -1.35372219 | -0.64864700 |
| C | -5.91094403  | -1.43084919 | -0.74671300 |
| C | -5.07909103  | -0.25358619 | -0.61171800 |
| H | -7.29946203  | 1.01893981  | -1.97616200 |
| H | -8.94701903  | 0.03047981  | -0.71131900 |
| H | -7.87026103  | -2.23461119 | -0.75262800 |
| H | -5.44541103  | -2.39372519 | -0.93089500 |
| O | -7.56939703  | 2.40554181  | -0.48836700 |
| H | -8.87950503  | 2.45030281  | -0.49823100 |
| N | -4.75343203  | 1.95773281  | -0.40829700 |
| H | -4.99178203  | 2.93436481  | -0.32209000 |
| O | -8.69130603  | 1.07640781  | 1.56474800  |
| O | -7.98620303  | 0.03648881  | 1.09573900  |
| O | -9.91484703  | 2.15947481  | -0.21358200 |
| H | -9.37275303  | 1.52391581  | 0.78736900  |
| H | -10.45706703 | 2.92012181  | 0.00811800  |

TS43

0 2

|   |             |            |             |
|---|-------------|------------|-------------|
| C | -2.30303030 | 0.01010101 | 0.00000000  |
| C | -2.11040330 | 1.39419301 | -0.14058600 |
| C | -3.18456130 | 2.26242401 | -0.24730300 |
| C | -4.46129830 | 1.70714201 | -0.20765100 |

---

|   |              |             |             |
|---|--------------|-------------|-------------|
| C | −4.67801130  | 0.31918401  | −0.06340400 |
| C | −3.57574330  | −0.53455599 | 0.03950900  |
| H | −1.43951130  | −0.63910499 | 0.07774700  |
| H | −1.10267230  | 1.79040201  | −0.16695300 |
| H | −3.03621830  | 3.33017101  | −0.35692600 |
| H | −3.71471030  | −1.60405299 | 0.14882400  |
| C | −6.67669130  | 1.38064301  | −0.19862000 |
| C | −8.13649730  | 1.67619801  | −0.21263600 |
| C | −8.91097530  | 0.38643801  | −0.05121300 |
| C | −8.31912230  | −0.85321899 | 0.16679600  |
| C | −6.93889230  | −1.01307699 | 0.13906000  |
| C | −6.11157230  | 0.12611201  | −0.05042000 |
| H | −8.42416130  | 2.10867301  | −1.18526200 |
| H | −8.97932130  | −1.70069399 | 0.30443200  |
| H | −6.50020130  | −1.99349899 | 0.27726000  |
| O | −8.39775430  | 2.63720601  | 0.80649800  |
| H | −9.32245730  | 2.53358501  | 1.06997700  |
| N | −5.70126730  | 2.32245601  | −0.29825000 |
| H | −5.87111930  | 3.31625101  | −0.28986300 |
| O | −10.82880430 | 1.29578301  | 0.99342100  |
| O | −10.21993130 | 0.45473301  | −0.20854900 |
| H | −11.67182730 | 1.51790001  | 0.57631000  |

TS44

0 2

|   |             |             |             |
|---|-------------|-------------|-------------|
| C | −0.98550723 | −0.61594203 | 0.00000000  |
| C | −0.73191423 | 0.75509397  | 0.18306000  |
| C | −1.70384323 | 1.70803397  | −0.07175600 |
| C | −2.94197623 | 1.25308697  | −0.51898100 |
| C | −3.21781723 | −0.12130903 | −0.71643200 |
| C | −2.21778123 | −1.06312703 | −0.44109200 |
| H | −0.19985823 | −1.33103303 | 0.21100100  |
| H | 0.24282977  | 1.07264097  | 0.53256200  |
| H | −1.51049623 | 2.76378997  | 0.07509700  |
| H | −2.40639723 | −2.12233803 | −0.57274800 |
| C | −5.05074323 | 1.10080697  | −1.23846700 |
| C | −6.38266223 | 1.58010397  | −1.72254300 |
| C | −7.37183723 | 0.12081097  | −0.76714300 |
| C | −6.81574123 | −1.11526003 | −1.32760700 |
| C | −5.47633523 | −1.30308503 | −1.41817900 |

---

|   |             |             |             |
|---|-------------|-------------|-------------|
| C | −4.58515423 | −0.20420003 | −1.15513000 |
| H | −6.67318623 | 1.14036597  | −2.69507600 |
| H | −8.41341123 | 0.35397097  | −0.97670500 |
| H | −7.50487123 | −1.85463603 | −1.72436600 |
| H | −5.07595623 | −2.25832803 | −1.74281300 |
| O | −6.79704623 | 2.69635497  | −1.38050400 |
| N | −4.08681023 | 1.96095097  | −0.84845500 |
| H | −4.23421123 | 2.95911897  | −0.79447700 |
| O | −7.89320023 | −0.24350403 | 1.40436400  |
| O | −7.00285223 | 0.46218697  | 0.52481300  |
| H | −7.32650323 | −0.96740603 | 1.70303100  |

TS45

02

|   |             |             |             |
|---|-------------|-------------|-------------|
| C | −0.63768115 | −0.24637682 | 0.00000000  |
| C | −0.25651515 | 1.08315318  | 0.27510600  |
| C | −1.12260115 | 2.13951618  | 0.07554600  |
| C | −2.39402515 | 1.83708618  | −0.42241100 |
| C | −2.79413615 | 0.51249018  | −0.70913300 |
| C | −1.89728015 | −0.54222682 | −0.47979200 |
| H | 0.07176085  | −1.04505482 | 0.17756400  |
| H | 0.73816485  | 1.27785018  | 0.65756300  |
| H | −0.83173415 | 3.15945118  | 0.29570100  |
| H | −2.19071515 | −1.56802982 | −0.67097300 |
| C | −4.50388815 | 1.91297018  | −1.17671800 |
| C | −5.68283015 | 2.61467518  | −1.70228800 |
| C | −7.22964415 | −0.18544182 | −0.70621000 |
| C | −6.25559015 | −0.85683482 | −1.48004100 |
| C | −4.91949915 | −0.57993582 | −1.61689900 |
| C | −4.15827515 | 0.56753918  | −1.17872200 |
| H | −6.45385315 | 1.99093418  | −2.17611200 |
| H | −8.23090015 | −0.61139082 | −0.64210200 |
| H | −6.61212215 | −1.76502882 | −1.95526200 |
| H | −4.32360515 | −1.34595582 | −2.10689600 |
| O | −5.76768315 | 3.81833218  | −1.64998400 |
| N | −3.45197015 | 2.65880418  | −0.71598600 |
| H | −3.48301515 | 3.66786318  | −0.67839900 |
| O | −6.10416315 | 0.47301518  | 1.30267600  |
| O | −7.00833115 | 0.87118918  | 0.01318700  |
| H | −5.28441815 | 0.91046418  | 1.02429500  |



TS46

0 2

|   |              |             |             |
|---|--------------|-------------|-------------|
| C | -1.41221367  | -0.19083969 | 0.00000000  |
| C | -1.10947567  | 1.15788631  | 0.26774200  |
| C | -2.08969767  | 2.13370431  | 0.26251600  |
| C | -3.39401467  | 1.72973231  | -0.02298800 |
| C | -3.72210167  | 0.37599431  | -0.28740500 |
| C | -2.70572767  | -0.58957969 | -0.27551400 |
| H | -0.61484667  | -0.92346269 | 0.01505400  |
| H | -0.08514167  | 1.43704131  | 0.48349400  |
| H | -1.85393367  | 3.17075231  | 0.46942800  |
| H | -2.93307167  | -1.63045069 | -0.47475100 |
| C | -5.59334767  | 1.63127031  | -0.36741900 |
| C | -6.97790867  | 2.02483731  | -0.65654700 |
| C | -7.96914067  | 0.84731731  | -0.49501400 |
| C | -7.38909167  | -0.49438869 | -0.88241100 |
| C | -6.06934767  | -0.72873469 | -0.84936800 |
| C | -5.13857967  | 0.33574831  | -0.51960100 |
| H | -6.84857867  | 1.96360531  | -1.90902400 |
| H | -8.87316267  | 1.07799431  | -1.06642700 |
| H | -8.09092367  | -1.28600869 | -1.11229400 |
| H | -5.68029767  | -1.71548469 | -1.07537000 |
| O | -7.39138167  | 3.22348231  | -0.46056300 |
| N | -4.55584467  | 2.47316631  | -0.10113000 |
| H | -4.66570367  | 3.45696131  | 0.09180700  |
| O | -9.36853067  | -0.03794869 | 1.08357100  |
| O | -8.29551867  | 0.87803631  | 0.89458900  |
| H | -10.06793367 | 0.55674531  | 1.38197700  |
| O | -6.38828567  | 1.67302931  | -3.27384200 |
| O | -5.26124567  | 1.23970731  | -3.25070600 |

TS47

0 1

|   |             |             |            |
|---|-------------|-------------|------------|
| C | 0.21413278  | -1.59528906 | 0.00000000 |
| C | 0.51708078  | -0.23087906 | 0.18257800 |
| C | -0.47521022 | 0.71217894  | 0.36471300 |
| C | -1.79703722 | 0.25834294  | 0.36227900 |
| C | -2.12195922 | -1.10799706 | 0.17935700 |

---

|   |             |             |             |
|---|-------------|-------------|-------------|
| C | -1.09162422 | -2.04152906 | -0.00339900 |
| H | 1.02304678  | -2.30063806 | -0.14381100 |
| H | 1.55324678  | 0.08534794  | 0.17770100  |
| H | -0.24022122 | 1.76039294  | 0.50360500  |
| H | -1.31795722 | -3.09061606 | -0.15321200 |
| C | -4.01647122 | 0.08954894  | 0.42958400  |
| C | -5.42943122 | 0.44655094  | 0.57549900  |
| C | -6.32680822 | -0.71791406 | 0.18279600  |
| C | -5.82827622 | -2.05967806 | 0.35194200  |
| C | -4.47734122 | -2.29654806 | 0.15267400  |
| C | -3.55370522 | -1.19551206 | 0.23904700  |
| H | -6.15912222 | -0.63182106 | -1.01249200 |
| H | -6.54303622 | -2.86943606 | 0.42048500  |
| H | -4.10331822 | -3.31245906 | 0.15693300  |
| O | -5.82581822 | 1.54165194  | 0.88112800  |
| N | -2.97302922 | 0.95949694  | 0.52007000  |
| H | -3.07812822 | 1.95437494  | 0.65074000  |
| O | -8.47045522 | -1.39966606 | -0.16006100 |
| O | -7.65641822 | -0.44871006 | 0.51097400  |
| H | -8.88617722 | -0.85383906 | -0.84055400 |
| O | -5.29398622 | -1.07038106 | -2.16966100 |
| O | -5.03001722 | -2.24286606 | -1.81203100 |

TS48

0 2

|   |             |             |             |
|---|-------------|-------------|-------------|
| C | -0.24809159 | -0.32442748 | 0.00000000  |
| C | 0.01627741  | 1.04383052  | 0.20746000  |
| C | -1.00439559 | 1.96500052  | 0.34175300  |
| C | -2.31416559 | 1.48469852  | 0.26382000  |
| C | -2.60110459 | 0.11323252  | 0.05434800  |
| C | -1.54324759 | -0.79673048 | -0.07744200 |
| H | 0.58154541  | -1.01311348 | -0.09979700 |
| H | 1.04426541  | 1.38078152  | 0.26288000  |
| H | -0.79870959 | 3.01635452  | 0.50199800  |
| H | -1.73895359 | -1.85053248 | -0.23791100 |
| C | -4.53386159 | 1.27428552  | 0.21956700  |
| C | -5.95270359 | 1.57884152  | 0.27001700  |
| C | -6.83819959 | 0.37631352  | 0.06738100  |
| C | -6.28234659 | -0.92752948 | -0.07635400 |
| C | -4.92597159 | -1.11430448 | -0.12039900 |

---

|   |             |             |             |
|---|-------------|-------------|-------------|
| C | −4.03516259 | −0.00465848 | 0.02996800  |
| H | −6.97780359 | −1.74947348 | −0.18658900 |
| H | −4.51856559 | −2.10906748 | −0.26046800 |
| O | −6.40625459 | 2.69412752  | 0.46219500  |
| N | −3.51053159 | 2.16289152  | 0.36171100  |
| H | −3.63969159 | 3.15233752  | 0.51140000  |
| O | −8.63337659 | 1.12055552  | 1.55430000  |
| O | −8.09124159 | 0.57582852  | −0.00720000 |
| H | −8.50370459 | 2.05888352  | 1.34112600  |

TS49

0 1

|   |             |             |             |
|---|-------------|-------------|-------------|
| C | −0.40404040 | −0.67676767 | 0.00000000  |
| C | −0.17074340 | 0.63847133  | 0.43628000  |
| C | −1.16782240 | 1.60097533  | 0.40350500  |
| C | −2.40931940 | 1.21357133  | −0.08690800 |
| C | −2.67086840 | −0.10748567 | −0.52067300 |
| C | −1.64504340 | −1.05987267 | −0.47489200 |
| H | 0.40134760  | −1.39918867 | 0.04462000  |
| H | 0.81061460  | 0.90663833  | 0.80820600  |
| H | −0.98673440 | 2.61197433  | 0.74712400  |
| H | −1.82254740 | −2.07785367 | −0.80137900 |
| C | −4.56371540 | 1.13865833  | −0.66445100 |
| C | −5.92516540 | 1.55865133  | −1.09173600 |
| C | −6.89341940 | 0.33966333  | −1.00778900 |
| C | −6.27152840 | −0.98223267 | −1.36344000 |
| C | −4.93490240 | −1.18538767 | −1.33923500 |
| C | −4.05670740 | −0.14696967 | −0.89505200 |
| H | −5.85160540 | 1.86532633  | −2.14525600 |
| H | −7.66000540 | 0.48791333  | −1.80581400 |
| H | −6.95684240 | −1.79143067 | −1.58389000 |
| H | −4.53089740 | −2.16783567 | −1.55911200 |
| O | −6.40250740 | 2.64592233  | −0.35026200 |
| H | −7.05660740 | 2.28058133  | 0.26624400  |
| N | −3.57503940 | 1.95595833  | −0.24149900 |
| H | −3.74037440 | 2.89062333  | 0.10256300  |
| O | −6.41261440 | −0.26667567 | 1.56089800  |
| O | −7.64641040 | 0.36469233  | 0.12418800  |
| O | −4.54633840 | 0.48574433  | 2.31089000  |
| N | −5.42142340 | 0.41268133  | 1.48581000  |

TS50

0 2

|   |             |             |             |
|---|-------------|-------------|-------------|
| C | -0.01908397 | -0.15267175 | 0.00000000  |
| C | 0.34600103  | 1.20403025  | 0.07156900  |
| C | -0.57593497 | 2.20951525  | -0.15795000 |
| C | -1.88211797 | 1.82340425  | -0.45971600 |
| C | -2.27201597 | 0.46643925  | -0.53205100 |
| C | -1.31503597 | -0.52999875 | -0.30021100 |
| H | 0.73187503  | -0.91175375 | 0.18207100  |
| H | 1.36991503  | 1.46604425  | 0.30930000  |
| H | -0.29436897 | 3.25463825  | -0.10571500 |
| H | -1.58519997 | -1.57835875 | -0.35468200 |
| C | -4.06127397 | 1.77537725  | -0.96971500 |
| C | -5.45050397 | 2.22834125  | -1.25989900 |
| C | -6.30017797 | 1.03483725  | -1.78105800 |
| C | -5.90725397 | -0.34052575 | -1.37172100 |
| C | -4.63852697 | -0.60772075 | -0.99867000 |
| C | -3.67627697 | 0.46161025  | -0.85361000 |
| H | -5.45243397 | 2.99692425  | -2.04507700 |
| H | -5.79460097 | 0.91842025  | -2.92232100 |
| H | -6.66010797 | -1.11112675 | -1.48439700 |
| H | -4.34188097 | -1.62323975 | -0.75852900 |
| O | -6.02163697 | 2.75261025  | -0.07714700 |
| H | -6.95943697 | 2.89029825  | -0.25883200 |
| N | -2.99417697 | 2.59558725  | -0.74056000 |
| H | -3.04225397 | 3.60032625  | -0.68162300 |
| O | -7.53117597 | 1.32078425  | -2.02165700 |
| O | -4.24697597 | -0.37103775 | -3.89596000 |
| O | -4.81571597 | 0.68276325  | -4.03174300 |

TS51

0 2

|   |             |             |             |
|---|-------------|-------------|-------------|
| C | -0.62977095 | -0.49618320 | 0.00000000  |
| C | -0.54542895 | 0.74092880  | 0.64846800  |
| C | -1.60133895 | 1.65054980  | 0.62366300  |
| C | -2.73632895 | 1.27817380  | -0.07167200 |
| C | -2.84643495 | 0.03464780  | -0.73397200 |
| C | -1.77594695 | -0.86073220 | -0.69257500 |

---

|   |             |             |             |
|---|-------------|-------------|-------------|
| H | 0.21015505  | −1.17775520 | 0.04555400  |
| H | 0.35905305  | 0.99871180  | 1.18576600  |
| H | −1.53204495 | 2.60501680  | 1.13084700  |
| H | −1.84338395 | −1.82321020 | −1.18554000 |
| C | −4.80037895 | 1.21733880  | −0.93752200 |
| C | −6.06805395 | 1.67834780  | −1.57282800 |
| C | −7.00138595 | 0.46170980  | −1.84621400 |
| C | −6.21954495 | −0.76053120 | −2.28846400 |
| C | −4.90110595 | −0.98490020 | −2.01299600 |
| C | −4.15877395 | −0.01004620 | −1.31284700 |
| H | −5.77329795 | 2.13239280  | −2.52985500 |
| H | −7.67683095 | 0.75691980  | −2.66177800 |
| H | −6.80519095 | −1.54576520 | −2.75407700 |
| H | −4.43558395 | −1.92838020 | −2.27475900 |
| O | −6.72415395 | 2.63718080  | −0.79531600 |
| H | −7.41735695 | 2.12493080  | −0.33846900 |
| N | −3.93206595 | 1.98490580  | −0.27790500 |
| H | −4.18368495 | 2.87901580  | 0.11943400  |
| O | −7.72051095 | 0.16803480  | −0.70737500 |
| O | −5.82961995 | 0.09085780  | 0.75245200  |
| H | −6.82042995 | 0.04292980  | 0.16138600  |
| H | −5.96363895 | 0.61771280  | 1.54474700  |

TS52

0 2

|   |             |             |             |
|---|-------------|-------------|-------------|
| C | −0.21739130 | −0.61594203 | 0.00000000  |
| C | 0.06575270  | 0.75270397  | 0.17054700  |
| C | −0.88457130 | 1.72339497  | −0.08949500 |
| C | −2.13646630 | 1.29270997  | −0.53039900 |
| C | −2.43696930 | −0.07739003 | −0.72639400 |
| C | −1.45678230 | −1.03879703 | −0.43993300 |
| H | 0.55246170  | −1.34559603 | 0.21908600  |
| H | 1.04757970  | 1.05187697  | 0.51671300  |
| H | −0.66784730 | 2.77560397  | 0.05144400  |
| H | −1.66824830 | −2.09425103 | −0.56587300 |
| C | −4.23846930 | 1.16051697  | −1.28126300 |
| C | −5.57848630 | 1.55149697  | −1.69155500 |
| C | −6.70978030 | 0.23553997  | −0.83284800 |
| C | −6.04407830 | −1.07053403 | −1.22453100 |
| C | −4.72079430 | −1.24752903 | −1.34413400 |

|      |             |             |             |
|------|-------------|-------------|-------------|
| C    | −3.79452330 | −0.13911603 | −1.18864100 |
| H    | −5.84532030 | 1.32827897  | −2.72320500 |
| H    | −7.57648630 | 0.50611597  | −1.46345800 |
| H    | −6.71972530 | −1.90970203 | −1.36375600 |
| H    | −4.32353630 | −2.23805703 | −1.54197400 |
| O    | −6.03317730 | 2.76509197  | −1.27708400 |
| N    | −3.26528130 | 2.02244697  | −0.84633700 |
| H    | −3.32923330 | 3.02676397  | −0.90348800 |
| O    | −6.71387930 | 0.62974197  | 0.36152900  |
| H    | −6.18259330 | 2.70449997  | −0.31984200 |
| TS53 |             |             |             |
| O 2  |             |             |             |
| C    | −0.23188405 | −0.28985508 | 0.00000000  |
| C    | 0.23586095  | 1.01404492  | 0.24686100  |
| C    | −0.59296105 | 2.11425092  | 0.11552300  |
| C    | −1.90934705 | 1.87977592  | −0.28314100 |
| C    | −2.39887205 | 0.58014092  | −0.54044000 |
| C    | −1.54090005 | −0.51718608 | −0.38190100 |
| H    | 0.44604195  | −1.12559808 | 0.12116100  |
| H    | 1.26520195  | 1.15893492  | 0.55157600  |
| H    | −0.23456105 | 3.11729092  | 0.31300800  |
| H    | −1.89901405 | −1.52680408 | −0.54765400 |
| C    | −4.07273405 | 2.07508592  | −0.88299800 |
| C    | −5.19485205 | 2.78247892  | −1.33818400 |
| C    | −6.88747305 | −0.01580208 | −0.32944700 |
| C    | −5.90557405 | −0.71266908 | −1.16239200 |
| C    | −4.58805005 | −0.42567108 | −1.30654200 |
| C    | −3.78967605 | 0.69881292  | −0.89831900 |
| H    | −6.11241805 | 2.29008492  | −1.61474900 |
| H    | −7.83710905 | −0.56938108 | −0.19792400 |
| H    | −6.25777905 | −1.64836608 | −1.58407200 |
| H    | −3.99897205 | −1.20485608 | −1.78930200 |
| O    | −5.17531205 | 4.10803492  | −1.17928200 |
| H    | −5.77245505 | 4.53777992  | −1.80760900 |
| N    | −2.94029805 | 2.76023392  | −0.49706300 |
| H    | −2.89400605 | 3.76618292  | −0.45548200 |
| O    | −6.73180905 | 1.04697792  | 0.23314500  |
| O    | −4.79665605 | 2.94990992  | −3.61399400 |
| O    | −5.13283505 | 4.09144992  | −3.86120400 |

TS54

0 2

|   |             |             |             |
|---|-------------|-------------|-------------|
| C | 0.05797101  | 0.01449275  | 0.00000000  |
| C | -0.24701099 | -1.33285025 | 0.17996500  |
| C | 0.75584801  | -2.28706025 | 0.35696900  |
| C | 2.06730201  | -1.84534525 | 0.34941700  |
| C | 2.39303201  | -0.49184925 | 0.17134600  |
| C | 1.38459201  | 0.44265375  | -0.00659300 |
| H | -0.73998499 | 0.73261375  | -0.13950000 |
| H | -1.28280199 | -1.65073125 | 0.18118000  |
| H | 0.51482501  | -3.33376525 | 0.49620200  |
| H | 1.62004601  | 1.49028375  | -0.15705800 |
| C | 4.37412001  | -1.78786725 | 0.39237500  |
| C | 6.80168801  | -0.55791525 | -1.44420900 |
| C | 7.00208101  | 0.35542975  | -0.30917400 |
| C | 6.02270601  | 0.93066575  | 0.39491800  |
| C | 4.57540501  | 0.75484075  | 0.25326700  |
| C | 3.85496001  | -0.37757025 | 0.21997300  |
| H | 5.77691901  | -0.81871325 | -1.71304000 |
| H | 8.03913801  | 0.59254275  | -0.09490600 |
| H | 6.30797201  | 1.67294775  | 1.13688200  |
| H | 4.01032001  | 1.68625075  | 0.25760200  |
| O | 7.76176301  | -1.29112625 | -1.84263000 |
| H | 8.03644501  | -0.76820625 | -2.88254600 |
| N | 3.24524601  | -2.57979125 | 0.50124000  |
| H | 3.30859001  | -3.58096225 | 0.60043400  |
| O | 5.51230301  | -2.18529325 | 0.43624100  |
| O | 6.93188301  | 0.73834575  | -2.91723100 |
| O | 7.83866901  | 0.18389775  | -3.60896200 |

TS55

0 1

|   |             |             |             |
|---|-------------|-------------|-------------|
| C | -0.20700637 | -0.19108279 | 0.00000000  |
| C | -0.64131137 | -1.49942279 | 0.28220400  |
| C | 0.25101963  | -2.55325279 | 0.36571700  |
| C | 1.60072563  | -2.26843679 | 0.15231000  |
| C | 2.05612963  | -0.96060379 | -0.13146900 |
| C | 1.13162963  | 0.08959121  | -0.20109100 |

---

|   |             |             |             |
|---|-------------|-------------|-------------|
| H | −0.93639237 | 0.60794521  | −0.05176000 |
| H | −1.69677737 | −1.68512479 | 0.44057300  |
| H | −0.08524237 | −3.55922979 | 0.58730100  |
| H | 1.46756263  | 1.10116821  | −0.39624100 |
| C | 3.82746563  | −2.35782279 | −0.07872000 |
| C | 5.20200463  | −2.92900079 | −0.15317800 |
| C | 6.20301763  | −1.82229079 | −0.36965900 |
| C | 5.89614563  | −0.54211479 | −0.56144900 |
| C | 4.48670763  | −0.00202279 | −0.58854400 |
| C | 3.48408063  | −1.05264879 | −0.27205800 |
| H | 5.26872463  | −3.63868979 | −0.98528000 |
| H | 7.24196263  | −2.13685479 | −0.35315100 |
| H | 6.69296463  | 0.17838721  | −0.70660300 |
| H | 4.26781663  | 0.47291321  | −1.55002500 |
| O | 5.51505763  | −3.70949979 | 0.99442400  |
| H | 5.49585563  | −3.12673979 | 1.76147600  |
| N | 2.70174563  | −3.10212279 | 0.16527200  |
| H | 2.70653563  | −4.07952979 | 0.41007700  |
| O | 4.28286263  | 0.98083921  | 0.46047600  |
| O | 4.87634063  | 2.25850821  | 0.24904800  |
| N | 5.54515863  | 2.38646721  | −0.95637500 |
| O | 5.95993963  | 3.47233521  | −1.05619900 |

TS55

0 1

|   |             |             |             |
|---|-------------|-------------|-------------|
| C | −0.20700637 | −0.19108279 | 0.00000000  |
| C | −0.64131137 | −1.49942279 | 0.28220400  |
| C | 0.25101963  | −2.55325279 | 0.36571700  |
| C | 1.60072563  | −2.26843679 | 0.15231000  |
| C | 2.05612963  | −0.96060379 | −0.13146900 |
| C | 1.13162963  | 0.08959121  | −0.20109100 |
| H | −0.93639237 | 0.60794521  | −0.05176000 |
| H | −1.69677737 | −1.68512479 | 0.44057300  |
| H | −0.08524237 | −3.55922979 | 0.58730100  |
| H | 1.46756263  | 1.10116821  | −0.39624100 |
| C | 3.82746563  | −2.35782279 | −0.07872000 |
| C | 5.20200463  | −2.92900079 | −0.15317800 |
| C | 6.20301763  | −1.82229079 | −0.36965900 |
| C | 5.89614563  | −0.54211479 | −0.56144900 |
| C | 4.48670763  | −0.00202279 | −0.58854400 |



---

|   |            |             |             |
|---|------------|-------------|-------------|
| C | 3.48408063 | −1.05264879 | −0.27205800 |
| H | 5.26872463 | −3.63868979 | −0.98528000 |
| H | 7.24196263 | −2.13685479 | −0.35315100 |
| H | 6.69296463 | 0.17838721  | −0.70660300 |
| H | 4.26781663 | 0.47291321  | −1.55002500 |
| O | 5.51505763 | −3.70949979 | 0.99442400  |
| H | 5.49585563 | −3.12673979 | 1.76147600  |
| N | 2.70174563 | −3.10212279 | 0.16527200  |
| H | 2.70653563 | −4.07952979 | 0.41007700  |
| O | 4.28286263 | 0.98083921  | 0.46047600  |
| O | 4.87634063 | 2.25850821  | 0.24904800  |

TS56

0 2

|   |             |             |             |
|---|-------------|-------------|-------------|
| C | −0.63768115 | −0.36231884 | 0.00000000  |
| C | −1.14049415 | −1.67247584 | 0.10253200  |
| C | −0.29932015 | −2.77085084 | 0.08753100  |
| C | 1.06964585  | −2.52796384 | −0.03271500 |
| C | 1.59457185  | −1.21967784 | −0.14160900 |
| C | 0.71905485  | −0.12608284 | −0.12039600 |
| H | −1.32819215 | 0.47173416  | 0.02193700  |
| H | −2.20882415 | −1.82464584 | 0.19806100  |
| H | −0.68901815 | −3.77862184 | 0.16982300  |
| H | 1.10177085  | 0.88605416  | −0.18520800 |
| C | 3.29808985  | −2.69631184 | −0.19390300 |
| C | 4.65993485  | −3.30511884 | −0.18529600 |
| C | 5.67485085  | −2.29458384 | −0.64965200 |
| C | 5.46286485  | −0.94417984 | −0.54566700 |
| C | 4.08362885  | −0.32626684 | −0.32044000 |
| C | 3.02132885  | −1.36056884 | −0.24568300 |
| H | 4.69463185  | −4.19880484 | −0.81423400 |
| H | 6.66892985  | −2.66995884 | −0.86506300 |
| H | 6.24793785  | −0.25932984 | −0.84452200 |
| H | 3.84672785  | 0.46395516  | −1.03762800 |
| O | 5.02593085  | −3.75352584 | 1.11667900  |
| H | 5.03755985  | −2.96994684 | 1.68506400  |
| N | 2.13192585  | −3.40923484 | −0.07641600 |
| H | 2.07609785  | −4.40537484 | 0.06103000  |
| O | 4.34916285  | 0.30342616  | 0.93952800  |
| O | 5.40062785  | −0.57604284 | 1.33631000  |

TS57

0 2

|   |             |             |             |
|---|-------------|-------------|-------------|
| C | -0.11594203 | -0.33333333 | 0.00000000  |
| C | -0.63399703 | -1.64001733 | 0.05356500  |
| C | 0.19783297  | -2.74557033 | 0.02751000  |
| C | 1.57106997  | -2.51409133 | -0.05432300 |
| C | 2.11294497  | -1.20748533 | -0.11010300 |
| C | 1.24562897  | -0.10744833 | -0.08081300 |
| H | -0.79856003 | 0.50713867  | 0.02566400  |
| H | -1.70571503 | -1.78406533 | 0.11753100  |
| H | -0.20222503 | -3.75169033 | 0.07101700  |
| H | 1.63575297  | 0.90328267  | -0.11540800 |
| C | 3.79790097  | -2.70789133 | -0.16662600 |
| C | 5.16072597  | -3.32198933 | -0.19649200 |
| C | 6.19412997  | -2.21600033 | -0.36123900 |
| C | 5.86069797  | -0.97920633 | -0.87136300 |
| C | 4.66815497  | -0.40105333 | -0.13825600 |
| C | 3.53890797  | -1.36622833 | -0.18166400 |
| H | 5.25500897  | -3.98422233 | -1.06546500 |
| H | 7.22133397  | -2.56531233 | -0.40904700 |
| H | 6.58365997  | -0.32153333 | -1.33628300 |
| H | 4.39941897  | 0.61301167  | -0.42933400 |
| O | 5.41213697  | -4.14219133 | 0.92109500  |
| H | 5.38252097  | -3.56135433 | 1.69284800  |
| N | 2.62397297  | -3.40844633 | -0.09818600 |
| H | 2.55758197  | -4.40719733 | 0.01668200  |
| O | 5.23118697  | -0.27100433 | 1.19464200  |
| O | 5.80137997  | -1.49416633 | 1.48001500  |

TS58

0 2

|   |             |             |             |
|---|-------------|-------------|-------------|
| C | -0.36231884 | -0.39130436 | 0.00000000  |
| C | -0.88650184 | -1.68347436 | -0.12859900 |
| C | -0.05992684 | -2.79628636 | -0.23212600 |
| C | 1.30946716  | -2.56949236 | -0.20523900 |
| C | 1.85308816  | -1.27891436 | -0.08129300 |
| C | 1.01020116  | -0.17893736 | 0.03245200  |
| H | -1.03943684 | 0.44936164  | 0.08504500  |

---

|   |             |             |             |
|---|-------------|-------------|-------------|
| H | -1.96078284 | -1.82174436 | -0.14521400 |
| H | -0.47018484 | -3.79446736 | -0.32707200 |
| H | 1.42218616  | 0.81570764  | 0.15767400  |
| C | 3.54637416  | -2.79988936 | -0.26090500 |
| C | 4.91326216  | -3.38747436 | -0.20549200 |
| C | 5.92210416  | -2.35666736 | -0.66311200 |
| C | 5.68295616  | -1.04880936 | -0.72052200 |
| C | 4.37947816  | -0.40163236 | -0.32441400 |
| C | 3.30386116  | -1.42949536 | -0.03734000 |
| H | 4.98050016  | -4.28679836 | -0.82333900 |
| H | 6.91565816  | -2.73894136 | -0.87324500 |
| H | 6.48444416  | -0.36588936 | -0.98328300 |
| H | 4.07929716  | 0.37969964  | -1.02855100 |
| O | 5.20718716  | -3.81613636 | 1.11999100  |
| H | 5.11361916  | -3.03372936 | 1.68458100  |
| N | 2.37030016  | -3.47451836 | -0.30031700 |
| H | 2.28140516  | -4.47855536 | -0.32099100 |
| O | 4.48098216  | 0.14501164  | 0.98392000  |
| O | 3.91073016  | -1.00833536 | 1.63775200  |

TS59

0 2

|   |             |             |             |
|---|-------------|-------------|-------------|
| C | -0.79710144 | -0.05797102 | 0.00000000  |
| C | -1.32099644 | -1.36383402 | 0.03348500  |
| C | -0.49812144 | -2.48058402 | 0.04978000  |
| C | 0.87476356  | -2.26383202 | 0.01636600  |
| C | 1.42654256  | -0.95218302 | -0.02796200 |
| C | 0.56598256  | 0.15848898  | -0.02406500 |
| H | -1.47717944 | 0.78447298  | -0.00078100 |
| H | -2.39540744 | -1.50118802 | 0.05427200  |
| H | -0.91038944 | -3.48129402 | 0.09314200  |
| H | 0.97025756  | 1.16348698  | -0.04377800 |
| C | 3.10737556  | -2.49042402 | 0.07476400  |
| C | 4.41762156  | -3.11129902 | -0.32870600 |
| C | 5.48267556  | -2.04089302 | -0.39512800 |
| C | 5.28149056  | -0.77239902 | -0.04463400 |
| C | 3.96669356  | -0.31787402 | 0.55214600  |
| C | 2.83396456  | -1.10842502 | -0.02732100 |
| H | 4.29248156  | -3.55908202 | -1.32111800 |
| H | 6.45824856  | -2.37904202 | -0.72973500 |

---

|   |            |             |             |
|---|------------|-------------|-------------|
| H | 6.09235756 | −0.05420402 | −0.08663500 |
| H | 3.83837356 | 0.76335398  | 0.52988500  |
| O | 4.77551256 | −4.17891202 | 0.52117400  |
| H | 4.86227156 | −3.78681502 | 1.40178200  |
| N | 1.91905456 | −3.17055602 | 0.04182200  |
| H | 1.83679956 | −4.17117302 | 0.12840400  |
| O | 3.90890156 | −0.68964202 | 1.94041600  |
| O | 3.76193956 | −2.09259202 | 1.92937800  |

TS60

0 2

|   |             |             |             |
|---|-------------|-------------|-------------|
| C | −0.15267175 | −0.64885495 | 0.00000000  |
| C | −0.76229775 | −1.91532995 | 0.06616700  |
| C | −0.01125075 | −3.07736095 | 0.08747200  |
| C | 1.37731325  | −2.94458995 | 0.03989900  |
| C | 2.00846325  | −1.68039195 | −0.01580500 |
| C | 1.22351125  | −0.51990895 | −0.03768500 |
| H | −0.77666175 | 0.23650205  | −0.01929100 |
| H | −1.84308975 | −1.98219995 | 0.09889500  |
| H | −0.48363275 | −4.05139595 | 0.13647200  |
| H | 1.69515825  | 0.45493105  | −0.08844200 |
| C | 3.59079325  | −3.28679595 | −0.00458200 |
| C | 4.89114725  | −4.01591995 | −0.04802300 |
| C | 6.03327325  | −3.03097095 | −0.00811400 |
| C | 5.89478625  | −1.70849895 | −0.02968100 |
| C | 4.56864325  | −0.99377195 | −0.09154700 |
| C | 3.42242325  | −1.93438495 | −0.03454900 |
| H | 4.95570325  | −4.60734995 | −0.96813900 |
| H | 7.02002825  | −3.47846095 | 0.06051300  |
| H | 6.76569525  | −1.06365295 | 0.02493100  |
| H | 4.51891125  | −0.35195895 | −0.98171000 |
| O | 4.98972425  | −4.98238795 | 0.99247300  |
| H | 4.97861925  | −4.51153395 | 1.83286500  |
| N | 2.36715725  | −3.90712895 | 0.03121200  |
| H | 2.23411925  | −4.90067095 | 0.13173300  |
| O | 4.44180725  | −0.12018095 | 1.05224700  |
| O | 5.31140725  | 0.95715405  | 0.89139100  |
| O | 3.72726725  | 2.52849805  | 0.10401200  |
| H | 3.24997525  | 2.52114605  | 0.95031900  |
| H | 4.79005525  | 1.60061005  | 0.28892900  |

---

TS61

0 2

|   |             |             |             |
|---|-------------|-------------|-------------|
| C | −0.15942029 | −0.69565220 | 0.00000000  |
| C | −0.65939229 | −2.01020020 | 0.02097700  |
| C | 0.18197271  | −3.10593920 | −0.06890800 |
| C | 1.54877871  | −2.85208420 | −0.18057600 |
| C | 2.06784071  | −1.53823920 | −0.19260500 |
| C | 1.19699371  | −0.44578320 | −0.10493700 |
| H | −0.85321029 | 0.13312980  | 0.06941900  |
| H | −1.72750129 | −2.16966020 | 0.10682100  |
| H | −0.20648129 | −4.11728920 | −0.05675800 |
| H | 1.59047671  | 0.56336880  | −0.11967800 |
| C | 3.77698871  | −3.01351420 | −0.36178200 |
| C | 5.13899771  | −3.61896320 | −0.46185900 |
| C | 6.19613271  | −2.55414820 | −0.28643100 |
| C | 5.94260171  | −1.24493020 | −0.22466400 |
| C | 4.57116671  | −0.69304620 | −0.35886000 |
| C | 3.49512171  | −1.67359020 | −0.29909700 |
| H | 5.26580171  | −4.08656820 | −1.44568100 |
| H | 7.21223871  | −2.92460520 | −0.19905500 |
| H | 6.73403971  | −0.51643020 | −0.08806000 |
| H | 4.53559871  | −0.08678220 | −1.46888800 |
| O | 5.30416471  | −4.69301920 | 0.45553300  |
| H | 5.27437871  | −4.32812520 | 1.34661500  |
| N | 2.61471971  | −3.72994120 | −0.29713900 |
| H | 2.57058571  | −4.73439520 | −0.22387600 |
| O | 4.31875671  | 1.20922680  | −0.99750200 |
| O | 4.35099071  | 0.52281880  | 0.28351100  |

## TS62

0 2

|   |             |             |             |
|---|-------------|-------------|-------------|
| C | −0.34351143 | −0.95419846 | 0.00000000  |
| C | −0.79265043 | −2.27891546 | −0.14363500 |
| C | 0.09243657  | −3.32335746 | −0.34769300 |
| C | 1.44954057  | −3.00772946 | −0.41029600 |
| C | 1.92029957  | −1.68305646 | −0.26177300 |
| C | 1.00369057  | −0.64463146 | −0.05293000 |
| H | −1.06865343 | −0.16551246 | 0.15881200  |

---

|   |             |             |             |
|---|-------------|-------------|-------------|
| H | -1.85455643 | -2.48692646 | -0.09239900 |
| H | -0.25628843 | -4.34327446 | -0.45769200 |
| H | 1.35271657  | 0.37318354  | 0.07100200  |
| C | 3.68387357  | -3.06833346 | -0.56848000 |
| C | 5.06318057  | -3.61681946 | -0.73675800 |
| C | 6.07969057  | -2.53919446 | -0.44605400 |
| C | 5.78122357  | -1.25309346 | -0.24074400 |
| C | 4.39447557  | -0.73460846 | -0.35396600 |
| C | 3.35473257  | -1.75303646 | -0.36168000 |
| H | 5.19854357  | -3.99066246 | -1.75871800 |
| H | 7.10714657  | -2.88119846 | -0.37616200 |
| H | 6.54440257  | -0.51953046 | -0.00749100 |
| H | 4.46011657  | -0.09562846 | -1.52190200 |
| O | 5.26854557  | -4.76836446 | 0.07575300  |
| H | 5.21463257  | -4.49070846 | 0.99689300  |
| N | 2.54595357  | -3.82715146 | -0.61043000 |
| H | 2.53631757  | -4.83329646 | -0.66767800 |
| O | 4.08174757  | 0.38096854  | 0.38467600  |
| O | 4.96889957  | 1.40584554  | 0.17802000  |
| O | 4.68740857  | 1.02933254  | -2.18822000 |
| H | 5.51811057  | 0.92984054  | -2.66474200 |
| H | 4.90292357  | 1.44339354  | -1.20973200 |

TS63

0 2

|   |             |             |             |
|---|-------------|-------------|-------------|
| C | -3.05343493 | 1.10687021  | 0.00000000  |
| C | -3.63359993 | -0.11266779 | -0.36258900 |
| C | -2.86210493 | -1.24399479 | -0.65884400 |
| C | -1.49646793 | -1.09884079 | -0.57793600 |
| C | -0.88240893 | 0.12712721  | -0.22419000 |
| C | -1.67444793 | 1.24223221  | 0.07932300  |
| H | -3.69160793 | 1.94942321  | 0.23325100  |
| H | -4.71316793 | -0.19091379 | -0.41008900 |
| H | -3.32668593 | -2.18415579 | -0.92820900 |
| H | -1.21007393 | 2.17054621  | 0.38897100  |
| C | 0.71095707  | -1.47765579 | -0.57132300 |
| C | 2.00662707  | -2.23000679 | -0.45891800 |
| C | 3.11146307  | -1.24016779 | -0.13171900 |
| C | 2.96260207  | 0.05148521  | 0.15174900  |
| C | 0.51456107  | -0.10331579 | -0.22033800 |

---

|   |             |             |             |
|---|-------------|-------------|-------------|
| H | 2.22629107  | −2.69271779 | −1.43642100 |
| H | 4.09521507  | −1.69197079 | −0.05877100 |
| H | 3.81535207  | 0.64916621  | 0.45406100  |
| O | 1.83330207  | −3.18306779 | 0.51769400  |
| H | 1.32947107  | −2.51060379 | 1.46065100  |
| N | −0.47033193 | −2.03621479 | −0.79977800 |
| H | −0.58343193 | −3.03950579 | −0.87617400 |
| O | 1.36972107  | 1.43863021  | 1.38905900  |
| O | 1.84097007  | 0.66176021  | 2.48152100  |
| O | 0.79537507  | −1.69984579 | 2.09769200  |
| H | 0.25156307  | −2.09836279 | 2.77912800  |
| H | 1.37061607  | −0.22277179 | 2.40390000  |
| C | 1.65010407  | 0.79272721  | 0.15012700  |
| H | 1.68733907  | 1.62716421  | −0.56345700 |

TS64

02

|   |             |             |             |
|---|-------------|-------------|-------------|
| C | −1.01449274 | −0.18840580 | 0.00000000  |
| C | −1.51276274 | −1.50070980 | −0.06612000 |
| C | −0.66505474 | −2.59179080 | −0.16726000 |
| C | 0.70341526  | −2.33160280 | −0.20803400 |
| C | 1.22041726  | −1.01972980 | −0.14717500 |
| C | 0.34632426  | 0.06533520  | −0.03570400 |
| H | −1.71152874 | 0.63609220  | 0.08655600  |
| H | −2.58322674 | −1.66418980 | −0.03383400 |
| H | −1.05097974 | −3.60315880 | −0.21348800 |
| H | 0.74211526  | 1.07086720  | 0.03675100  |
| C | 2.93941026  | −2.49937680 | −0.28713700 |
| C | 4.30411026  | −3.09891280 | −0.37085600 |
| C | 5.35244026  | −2.02579980 | −0.22538200 |
| C | 5.06781926  | −0.70775580 | −0.12852100 |
| C | 3.72074426  | −0.21042080 | −0.16771000 |
| C | 2.65731026  | −1.14791780 | −0.20300600 |
| H | 4.42823526  | −3.59592080 | −1.34226600 |
| H | 6.37860526  | −2.37532180 | −0.20888500 |
| H | 5.86028726  | 0.02595320  | −0.03102900 |
| H | 3.51450026  | 2.28605020  | 1.41172300  |
| O | 4.47334326  | −4.15824480 | 0.57065900  |
| H | 4.46323326  | −3.76819580 | 1.45159000  |
| N | 1.77573826  | −3.20896280 | −0.30158800 |

---

|   |            |             |             |
|---|------------|-------------|-------------|
| H | 1.72266826 | −4.21544880 | −0.28305500 |
| O | 3.49311726 | 1.08880420  | −0.12278800 |
| O | 3.02511726 | 1.45642120  | 1.33515500  |

#### TS65

0 2

|   |             |             |             |
|---|-------------|-------------|-------------|
| C | −1.15151515 | −1.02020200 | 0.00000000  |
| C | −1.69901615 | −2.31396300 | 0.09753200  |
| C | −0.90702215 | −3.44472900 | 0.00964900  |
| C | 0.46268285  | −3.25556300 | −0.18141700 |
| C | 1.03288385  | −1.96082700 | −0.28310100 |
| C | 0.20457785  | −0.83150100 | −0.18670200 |
| H | −1.80855915 | −0.16241300 | 0.07367700  |
| H | −2.76624915 | −2.42672300 | 0.24584200  |
| H | −1.33310015 | −4.43774100 | 0.08897200  |
| H | 0.62925685  | 0.16328700  | −0.25825800 |
| C | 2.66577285  | −3.49973000 | −0.42263900 |
| C | 3.99179485  | −4.13647400 | −0.56611800 |
| C | 5.11094985  | −3.14153200 | −0.42345400 |
| C | 4.90950585  | −1.82324000 | −0.41808300 |
| C | 3.55741785  | −1.15788000 | −0.52266200 |
| C | 2.44544485  | −2.15034700 | −0.44868000 |
| H | 4.02412485  | −4.25401100 | −1.81365400 |
| H | 6.10375885  | −3.57006100 | −0.34279700 |
| H | 5.74780885  | −1.14362600 | −0.30198900 |
| H | 3.51080985  | −0.57779700 | −1.45268700 |
| O | 4.15422285  | −5.37575800 | −0.23773400 |
| H | 2.53271185  | −0.91297000 | 1.91654300  |
| N | 1.48384985  | −4.17604900 | −0.29362500 |
| H | 1.41938685  | −5.17640300 | −0.18290200 |
| O | 3.46287885  | −0.70619800 | 1.74443100  |
| O | 3.41156785  | −0.12435200 | 0.45269300  |
| O | 3.91158285  | −3.78360800 | −3.23781200 |
| O | 3.63689585  | −2.61135300 | −3.26956000 |

#### TS66

0 1

|   |             |             |             |
|---|-------------|-------------|-------------|
| C | −0.49872000 | −0.64469600 | 0.13231500  |
| C | −1.05218200 | −1.92249600 | −0.05728400 |



---

|   |             |             |             |
|---|-------------|-------------|-------------|
| C | −0.25805500 | −3.03194900 | −0.29591200 |
| C | 1.11907800  | −2.83076700 | −0.34603100 |
| C | 1.69278700  | −1.55096400 | −0.16235100 |
| C | 0.86941900  | −0.44728800 | 0.08520400  |
| H | −1.15720900 | 0.19388800  | 0.32076900  |
| H | −2.12779900 | −2.04440700 | −0.01346300 |
| H | −0.69036100 | −4.01463500 | −0.43936700 |
| H | 1.30406700  | 0.53238000  | 0.23979200  |
| C | 3.32393900  | −3.08606700 | −0.55712200 |
| C | 4.65061200  | −3.73976000 | −0.59452000 |
| C | 5.77810200  | −2.79379700 | −0.44745600 |
| C | 5.58202900  | −1.47604900 | −0.31007900 |
| C | 4.22911700  | −0.86151400 | −0.43020200 |
| C | 3.11523000  | −1.73359400 | −0.27409600 |
| H | 6.76928700  | −3.22906700 | −0.41868300 |
| H | 6.40939600  | −0.78537800 | −0.19781500 |
| H | 4.18502200  | −0.77226100 | −1.69794000 |
| O | 4.76370000  | −4.94066000 | −0.69345300 |
| H | 4.52627000  | 1.77450200  | −1.08435100 |
| N | 2.14183000  | −3.74285500 | −0.55565500 |
| H | 2.05596100  | −4.72961400 | −0.74865100 |
| O | 5.03056300  | 1.27280800  | −0.42932600 |
| O | 4.03947300  | 0.40945900  | 0.10752800  |
| O | 3.65558400  | −2.50558700 | −2.69033000 |
| O | 4.16936300  | −1.36875500 | −2.88560700 |

TS67

02

|   |             |             |             |
|---|-------------|-------------|-------------|
| C | −0.26717556 | −1.14503815 | 0.00000000  |
| C | −0.85440456 | −2.41648215 | −0.13529300 |
| C | −0.08702156 | −3.55184915 | −0.32541400 |
| C | 1.29600144  | −3.38051215 | −0.38325600 |
| C | 1.90246644  | −2.10920515 | −0.25502700 |
| C | 1.10466444  | −0.97789015 | −0.05434900 |
| H | −0.90611456 | −0.28464015 | 0.15613700  |
| H | −1.93263456 | −2.50970315 | −0.08512300 |
| H | −0.53983556 | −4.53091315 | −0.42510600 |
| H | 1.56773644  | −0.00768815 | 0.07236200  |
| C | 3.50018644  | −3.69622615 | −0.55178900 |
| C | 4.79924644  | −4.34499115 | −0.72216600 |

---

|   |            |             |             |
|---|------------|-------------|-------------|
| C | 5.94314644 | −3.41872015 | −0.67547100 |
| C | 5.77454444 | −2.08974315 | −0.48637300 |
| C | 4.46131544 | −1.48617915 | −0.36895700 |
| C | 3.32155944 | −2.33032715 | −0.37196900 |
| H | 6.92482144 | −3.86316115 | −0.78683800 |
| H | 6.61952944 | −1.41232615 | −0.44318000 |
| O | 4.90607544 | −5.55164215 | −0.88542100 |
| H | 4.20800444 | 1.07673385  | 1.25188000  |
| N | 2.29763944 | −4.32139015 | −0.56071800 |
| H | 2.18619744 | −5.31710415 | −0.68486100 |
| O | 3.83478144 | 0.18404885  | 1.26459500  |
| O | 4.37319844 | −0.20081315 | −0.27994000 |

TS68

0 1

|   |             |             |             |
|---|-------------|-------------|-------------|
| C | −0.20700637 | −0.19108279 | 0.00000000  |
| C | −0.64131137 | −1.49942279 | 0.28220400  |
| C | 0.25101963  | −2.55325279 | 0.36571700  |
| C | 1.60072563  | −2.26843679 | 0.15231000  |
| C | 2.05612963  | −0.96060379 | −0.13146900 |
| C | 1.13162963  | 0.08959121  | −0.20109100 |
| H | −0.93639237 | 0.60794521  | −0.05176000 |
| H | −1.69677737 | −1.68512479 | 0.44057300  |
| H | −0.08524237 | −3.55922979 | 0.58730100  |
| H | 1.46756263  | 1.10116821  | −0.39624100 |
| C | 3.82746563  | −2.35782279 | −0.07872000 |
| C | 5.20200463  | −2.92900079 | −0.15317800 |
| C | 6.20301763  | −1.82229079 | −0.36965900 |
| C | 5.89614563  | −0.54211479 | −0.56144900 |
| C | 4.48670763  | −0.00202279 | −0.58854400 |
| C | 3.48408063  | −1.05264879 | −0.27205800 |
| H | 5.26872463  | −3.63868979 | −0.98528000 |
| H | 7.24196263  | −2.13685479 | −0.35315100 |
| H | 6.69296463  | 0.17838721  | −0.70660300 |
| H | 4.26781663  | 0.47291321  | −1.55002500 |
| O | 5.51505763  | −3.70949979 | 0.99442400  |
| H | 5.49585563  | −3.12673979 | 1.76147600  |
| N | 2.70174563  | −3.10212279 | 0.16527200  |
| H | 2.70653563  | −4.07952979 | 0.41007700  |
| O | 4.28286263  | 0.98083921  | 0.46047600  |

---

|   |            |            |             |
|---|------------|------------|-------------|
| O | 4.87634063 | 2.25850821 | 0.24904800  |
| N | 5.54515863 | 2.38646721 | −0.95637500 |
| O | 5.95993963 | 3.47233521 | −1.05619900 |

# TS69

0 1

|   |             |             |             |
|---|-------------|-------------|-------------|
| C | 0.38216560  | −0.50955412 | 0.00000000  |
| C | −0.10068640 | −1.79960912 | 0.28773300  |
| C | 0.74964960  | −2.88847812 | 0.36857000  |
| C | 2.10915560  | −2.65790512 | 0.15194600  |
| C | 2.61231060  | −1.36579212 | −0.12981400 |
| C | 1.72995160  | −0.28058312 | −0.20896000 |
| H | −0.31780040 | 0.31518888  | −0.05583500 |
| H | −1.16218340 | −1.94470612 | 0.44913900  |
| H | 0.37353860  | −3.88072312 | 0.58832500  |
| H | 2.11118960  | 0.70954288  | −0.42734100 |
| C | 4.33124860  | −2.83070912 | −0.08647000 |
| C | 5.69124060  | −3.44728112 | −0.12076600 |
| C | 6.74679060  | −2.37284112 | −0.24056600 |
| C | 6.49516660  | −1.07629212 | −0.42394200 |
| C | 5.10660560  | −0.53372112 | −0.55724500 |
| C | 4.03385760  | −1.51046512 | −0.26782200 |
| H | 5.77416260  | −4.13468812 | −0.97048300 |
| H | 7.76978560  | −2.72428312 | −0.15197400 |
| H | 7.29492060  | −0.34690512 | −0.49397200 |
| H | 4.98675960  | −0.27774212 | −1.79858800 |
| O | 5.91354260  | −4.28167412 | 1.01321000  |
| H | 5.90262560  | −3.72020312 | 1.79608100  |
| N | 3.17640160  | −3.53418012 | 0.15825200  |
| H | 3.15085660  | −4.50274012 | 0.43488800  |
| O | 4.92246960  | 0.73390288  | −0.26402400 |
| O | 4.69677960  | 1.13542988  | −2.01199000 |
| H | 4.45978960  | 1.95028388  | −2.49989800 |

# TS70

0 2

|   |            |             |            |
|---|------------|-------------|------------|
| C | 1.87022891 | −0.49618320 | 0.00000000 |
| C | 1.38607491 | −1.80585120 | 0.17492600 |
| C | 2.23924591 | −2.89507120 | 0.18522300 |

|   |            |             |             |
|---|------------|-------------|-------------|
| C | 3.60137291 | -2.64530020 | 0.00895400  |
| C | 4.10665191 | -1.33562420 | -0.16871400 |
| C | 3.22042791 | -0.24996620 | -0.16747200 |
| H | 1.17049591 | 0.33052380  | 0.00461900  |
| H | 0.32269291 | -1.96511920 | 0.30785200  |
| H | 1.86344591 | -3.90209720 | 0.32314600  |
| H | 3.59719691 | 0.75938980  | -0.28059000 |
| C | 5.82734191 | -2.79269520 | -0.19689000 |
| C | 7.18587491 | -3.40652420 | -0.25941000 |
| C | 8.23703191 | -2.32372820 | -0.28270600 |
| C | 7.98321691 | -1.02211420 | -0.38536100 |
| C | 6.59251891 | -0.43290120 | -0.50356300 |
| C | 5.53232191 | -1.46614720 | -0.29615500 |
| H | 7.28201291 | -4.02276520 | -1.16037200 |
| H | 9.25967191 | -2.67777820 | -0.19624400 |
| H | 8.79036691 | -0.29681620 | -0.37920200 |
| H | 6.49979891 | -0.00952220 | -1.53102000 |
| O | 7.39725991 | -4.32301020 | 0.80965600  |
| H | 7.36027191 | -3.82638420 | 1.63432900  |
| N | 4.67128791 | -3.51631820 | -0.02700400 |
| H | 4.64342091 | -4.50412820 | 0.16895600  |
| O | 6.43890991 | 0.70709680  | 0.25213200  |
| O | 5.71362274 | 2.96243175  | -0.12186920 |
| H | 6.06591817 | 1.63489287  | 0.01202799  |
| H | 5.84671732 | 3.37424135  | 0.73504310  |

TS71

01

|   |             |             |             |
|---|-------------|-------------|-------------|
| C | -0.46464646 | -0.83838383 | 0.00000000  |
| C | -0.93300546 | -2.16500183 | -0.03054200 |
| C | -0.07027946 | -3.23148383 | -0.20882600 |
| C | 1.28636454  | -2.94063083 | -0.36299700 |
| C | 1.77555654  | -1.61305783 | -0.33385400 |
| C | 0.87953754  | -0.55095483 | -0.14638600 |
| H | -1.17295746 | -0.03228883 | 0.14658100  |
| H | -1.99257946 | -2.35529583 | 0.09065100  |
| H | -0.43421846 | -4.25188183 | -0.23022800 |
| H | 1.24026654  | 0.47004117  | -0.10219100 |
| C | 3.50956854  | -3.02970183 | -0.62843500 |
| C | 4.87565354  | -3.60659083 | -0.80425900 |

---

|   |            |             |             |
|---|------------|-------------|-------------|
| C | 5.91719754 | −2.52176083 | −0.65603300 |
| C | 5.65784054 | −1.22210083 | −0.53877100 |
| C | 4.25494454 | −0.66178783 | −0.56948100 |
| C | 3.19807354 | −1.70858483 | −0.50182300 |
| H | 4.97080454 | −4.06666983 | −1.79408300 |
| H | 6.94398254 | −2.87315383 | −0.63322500 |
| H | 6.45126454 | −0.49263583 | −0.41858600 |
| H | 4.18402054 | −0.17864083 | −1.62678500 |
| O | 5.10812754 | −4.68328483 | 0.09750400  |
| H | 5.07894654 | −4.32882983 | 0.99280500  |
| N | 2.36237354 | −3.78291783 | −0.55710900 |
| H | 2.34560754 | −4.78963983 | −0.51952100 |
| O | 4.09429354 | 0.40202017  | 0.23087900  |
| O | 3.54195754 | 1.77249917  | −0.71754700 |
| N | 3.67105454 | 1.44250717  | −1.89493100 |
| O | 3.39195254 | 2.17608817  | −2.79821500 |

TS72

0 2

|   |             |             |             |
|---|-------------|-------------|-------------|
| C | 0.17389814  | −0.21739130 | −0.00227645 |
| C | 0.06310114  | −1.46301330 | −0.61835545 |
| C | 1.18780214  | −2.20640830 | −0.97024945 |
| C | 2.43665914  | −1.66896330 | −0.68739745 |
| C | 2.55429014  | −0.42582930 | −0.05863345 |
| C | 1.43319814  | 0.30874070  | 0.28272255  |
| H | −0.71849786 | 0.33466670  | 0.26387355  |
| H | −0.92064486 | −1.86576930 | −0.82987745 |
| H | 1.08893414  | −3.17126030 | −1.45321745 |
| H | 1.53256214  | 1.26568470  | 0.78390755  |
| C | 4.69301314  | −1.44162630 | −0.29384545 |
| C | 6.04291514  | −1.32016030 | −1.01712245 |
| C | 6.62513214  | 0.06897070  | −0.95105145 |
| C | 5.94702214  | 1.19968070  | −0.60925745 |
| C | 4.60626014  | 1.15651170  | −0.17176445 |
| C | 4.01101614  | −0.14380730 | 0.15438255  |
| H | 5.88200514  | −1.54893330 | −2.07638845 |
| H | 7.66170914  | 0.13375770  | −1.26589145 |
| H | 6.44584914  | 2.15977870  | −0.67516345 |
| H | 4.04108814  | 2.05876770  | 0.02722155  |
| O | 6.95451214  | −2.28200330 | −0.53844445 |

---

|   |            |             |             |
|---|------------|-------------|-------------|
| H | 6.84273914 | −2.30645830 | 0.42201055  |
| N | 3.69811514 | −2.19058830 | −1.01659245 |
| H | 3.81257914 | −3.19567130 | −1.04163145 |
| O | 4.88388314 | −1.90478630 | 1.04689555  |
| O | 4.50071014 | −0.17801630 | 1.47877755  |

### TS73

0 2

|   |             |             |             |
|---|-------------|-------------|-------------|
| C | 0.60869564  | −0.26086957 | 0.00000000  |
| C | 0.58127564  | −1.65037757 | −0.14011600 |
| C | 1.74954164  | −2.39788157 | −0.26186400 |
| C | 2.95992764  | −1.71699957 | −0.23815300 |
| C | 3.00001864  | −0.31748757 | −0.08767500 |
| C | 1.82454664  | 0.41339243  | 0.02904600  |
| H | −0.31944636 | 0.28877743  | 0.08969900  |
| H | −0.37338736 | −2.16308157 | −0.15669100 |
| H | 1.71453164  | −3.47452357 | −0.37523000 |
| H | 1.85737264  | 1.49064543  | 0.14551400  |
| C | 5.19941364  | −1.21256757 | −0.10495000 |
| C | 6.42632664  | −1.14580157 | −1.02108600 |
| C | 7.20537664  | 0.05912143  | −0.58354700 |
| C | 6.56584064  | 0.95906243  | 0.27021300  |
| C | 5.11771664  | 1.16685143  | 0.18793000  |
| C | 4.40303364  | 0.06079343  | −0.05963800 |
| H | 6.08076464  | −1.08044557 | −2.05767300 |
| H | 8.28314064  | 0.04043943  | −0.67925900 |
| H | 7.15989864  | 1.73173943  | 0.74561300  |
| H | 4.68720064  | 2.13251343  | 0.42043600  |
| O | 7.18891064  | −2.32596557 | −0.91744700 |
| H | 7.43268264  | −2.41834657 | 0.01273300  |
| N | 4.24678364  | −2.22590257 | −0.39860400 |
| H | 4.47347264  | −3.18950857 | −0.20550300 |
| O | 5.71126464  | −1.43200857 | 1.25429500  |
| O | 6.60456564  | −0.41671257 | 1.63480300  |

### TS74

0 2

|   |             |             |             |
|---|-------------|-------------|-------------|
| C | −0.20289855 | −0.37681161 | 0.00000000  |
| C | −0.76625255 | −1.64783261 | −0.13526700 |

|   |             |             |             |
|---|-------------|-------------|-------------|
| C | 0.00622945  | −2.76150861 | −0.45920100 |
| C | 1.36867645  | −2.57290861 | −0.64252100 |
| C | 1.95081545  | −1.29654061 | −0.50106100 |
| C | 1.16364045  | −0.19586661 | −0.18138600 |
| H | −0.83276655 | 0.46650539  | 0.25261100  |
| H | −1.83216855 | −1.77455361 | 0.01433600  |
| H | −0.44369655 | −3.74084261 | −0.56810300 |
| H | 1.61111045  | 0.78506739  | −0.06764200 |
| C | 3.63044245  | −2.94164561 | −0.85889200 |
| C | 4.68965445  | −3.24906861 | −1.89500400 |
| C | 5.88732345  | −2.44772461 | −1.43589100 |
| C | 5.73254845  | −1.13353661 | −1.06311100 |
| C | 4.42373245  | −0.60094661 | −0.82024300 |
| C | 3.37003045  | −1.45132561 | −0.74348300 |
| H | 4.33736845  | −2.88038561 | −2.86390900 |
| H | 6.86806145  | −2.84990861 | −1.66314400 |
| H | 6.60231745  | −0.50717261 | −0.91083800 |
| H | 4.29505345  | 0.46392539  | −0.66192000 |
| O | 4.94517245  | −4.61867761 | −2.02416300 |
| H | 5.35960545  | −4.88769261 | −1.19339800 |
| N | 2.33370445  | −3.50641861 | −1.02307600 |
| H | 2.21225145  | −4.49184161 | −0.84349900 |
| O | 5.56718645  | −3.45944561 | 0.32864100  |
| O | 4.20015845  | −3.33036961 | 0.43690300  |

TS75

0 2

|   |             |             |             |
|---|-------------|-------------|-------------|
| C | −0.57251909 | 0.45801526  | 0.00000000  |
| C | −0.57420709 | −0.60673074 | −0.89563200 |
| C | 0.60754991  | −1.25880274 | −1.25603600 |
| C | 1.78978191  | −0.82702674 | −0.68180400 |
| C | 1.79454391  | 0.24803426  | 0.22854100  |
| C | 0.62541891  | 0.90338126  | 0.56390000  |
| H | −1.50455309 | 0.94103326  | 0.26486700  |
| H | −1.51190009 | −0.94297674 | −1.32218900 |
| H | 0.59776791  | −2.08089474 | −1.96184100 |
| H | 0.63784891  | 1.73086426  | 1.26346600  |
| C | 3.86236491  | −0.87784074 | 0.24722800  |
| C | 5.40355291  | −0.79795374 | 0.17280800  |
| C | 5.90693391  | 0.29800126  | −0.69512600 |

---

|   |            |             |             |
|---|------------|-------------|-------------|
| C | 5.24514391 | 1.45935626  | −0.55461400 |
| C | 3.92884391 | 1.55879226  | 0.09796000  |
| C | 3.23081391 | 0.47245026  | 0.47720800  |
| H | 5.37254291 | −2.12400074 | 0.09958900  |
| H | 6.82367991 | 0.21093026  | −1.26545200 |
| H | 5.61751591 | 2.35627226  | −1.03805700 |
| H | 3.41248991 | 2.50977126  | 0.02024400  |
| O | 5.90474691 | −0.65056174 | 1.46078600  |
| H | 6.68201591 | −0.08603874 | 1.42218900  |
| N | 3.10841191 | −1.29565974 | −0.92720300 |
| H | 3.18208291 | −2.29413174 | −1.09336800 |
| O | 4.48354791 | −2.91329974 | 0.68195100  |
| O | 3.74534991 | −1.87220774 | 1.25704200  |

TS75

0 2

|   |             |             |             |
|---|-------------|-------------|-------------|
| C | −0.57251909 | 0.45801526  | 0.00000000  |
| C | −0.57420709 | −0.60673074 | −0.89563200 |
| C | 0.60754991  | −1.25880274 | −1.25603600 |
| C | 1.78978191  | −0.82702674 | −0.68180400 |
| C | 1.79454391  | 0.24803426  | 0.22854100  |
| C | 0.62541891  | 0.90338126  | 0.56390000  |
| H | −1.50455309 | 0.94103326  | 0.26486700  |
| H | −1.51190009 | −0.94297674 | −1.32218900 |
| H | 0.59776791  | −2.08089474 | −1.96184100 |
| H | 0.63784891  | 1.73086426  | 1.26346600  |
| C | 3.86236491  | −0.87784074 | 0.24722800  |
| C | 5.40355291  | −0.79795374 | 0.17280800  |
| C | 5.90693391  | 0.29800126  | −0.69512600 |
| C | 5.24514391  | 1.45935626  | −0.55461400 |
| C | 3.92884391  | 1.55879226  | 0.09796000  |
| C | 3.23081391  | 0.47245026  | 0.47720800  |
| H | 5.37254291  | −2.12400074 | 0.09958900  |
| H | 6.82367991  | 0.21093026  | −1.26545200 |
| H | 5.61751591  | 2.35627226  | −1.03805700 |
| H | 3.41248991  | 2.50977126  | 0.02024400  |
| O | 5.90474691  | −0.65056174 | 1.46078600  |
| H | 6.68201591  | −0.08603874 | 1.42218900  |
| N | 3.10841191  | −1.29565974 | −0.92720300 |
| H | 3.18208291  | −2.29413174 | −1.09336800 |



|      |             |             |             |
|------|-------------|-------------|-------------|
| O    | 4.48354791  | -2.91329974 | 0.68195100  |
| O    | 3.74534991  | -1.87220774 | 1.25704200  |
| TS76 |             |             |             |
| O 2  |             |             |             |
| C    | -0.45801524 | -0.38167938 | 0.00000000  |
| C    | -0.50829624 | -1.74327338 | -0.30990400 |
| C    | 0.64613376  | -2.46010338 | -0.59257300 |
| C    | 1.86659976  | -1.75111738 | -0.57157800 |
| C    | 1.92138276  | -0.35952538 | -0.23284900 |
| C    | 0.75534676  | 0.32035162  | 0.04306200  |
| H    | -1.37931124 | 0.14412262  | 0.21990400  |
| H    | -1.46472124 | -2.25037938 | -0.32237800 |
| H    | 0.63118476  | -3.50718138 | -0.85563900 |
| H    | 0.77218376  | 1.37050262  | 0.30883800  |
| C    | 4.08783576  | -1.29818038 | -0.30735700 |
| C    | 5.39314276  | -1.19617538 | -1.07477400 |
| C    | 6.11711276  | 0.06134662  | -0.64644200 |
| C    | 5.45530476  | 1.16424662  | -0.27279800 |
| C    | 3.99367176  | 1.17230762  | -0.19424500 |
| C    | 3.32373376  | 0.01184362  | -0.24937300 |
| H    | 5.13452076  | -1.07730838 | -2.13709100 |
| H    | 7.19871076  | 0.03820262  | -0.71689300 |
| H    | 5.99024776  | 2.07599062  | -0.03623200 |
| H    | 3.46953376  | 2.11674362  | -0.09516500 |
| O    | 6.18047176  | -2.35583638 | -0.97496500 |
| H    | 6.05905276  | -2.73654038 | -0.09363100 |
| N    | 3.10066776  | -2.21247238 | -0.86694500 |
| H    | 3.27030376  | -3.21265638 | -0.80801100 |
| O    | 4.57534276  | -2.98680238 | 1.23422300  |
| O    | 4.30888376  | -1.60150638 | 1.07339800  |
| O    | 2.16470976  | -3.69754238 | 1.06885400  |
| H    | 3.61047176  | -3.34737938 | 1.31227300  |
| H    | 1.75667676  | -4.16644738 | 1.80469800  |
| TS77 |             |             |             |
| O 2  |             |             |             |
| C    | -0.66273930 | -0.33136966 | 0.00000000  |
| C    | -0.72107730 | -1.70038266 | -0.33650600 |

|   |             |             |             |
|---|-------------|-------------|-------------|
| C | 0.42427970  | -2.44740766 | -0.50932700 |
| C | 1.66353870  | -1.80838466 | -0.32207700 |
| C | 1.72276270  | -0.43128066 | 0.03841700  |
| C | 0.55127170  | 0.31051834  | 0.17955600  |
| H | -1.58644030 | 0.22083034  | 0.12208800  |
| H | -1.68960030 | -2.16835166 | -0.46657500 |
| H | 0.38923770  | -3.49513466 | -0.78047700 |
| H | 0.58899970  | 1.36121434  | 0.44208600  |
| C | 3.86492970  | -1.38544966 | -0.03166600 |
| C | 5.11228570  | -1.22015566 | -0.92115300 |
| C | 5.86650470  | 0.01437934  | -0.47970900 |
| C | 5.24055970  | 1.08777134  | 0.02060600  |
| C | 3.78869870  | 1.08310734  | 0.19048700  |
| C | 3.12124570  | -0.08071066 | 0.12040200  |
| H | 4.74723370  | -1.04369666 | -1.94268000 |
| H | 6.93981870  | -0.00788966 | -0.62999000 |
| H | 5.79361970  | 1.98443834  | 0.27292400  |
| H | 3.26446270  | 2.02173234  | 0.33470100  |
| O | 5.91168170  | -2.36531566 | -0.95606800 |
| H | 5.85138770  | -2.82130566 | -0.10416200 |
| N | 2.89797370  | -2.37113966 | -0.47627100 |
| H | 3.32653070  | -3.23523466 | 0.20288200  |
| O | 4.26301070  | -3.25179266 | 1.15801200  |
| O | 4.28150870  | -1.86164466 | 1.26408800  |

TS78

02

|   |             |             |             |
|---|-------------|-------------|-------------|
| C | 0.38291604  | -0.00736377 | 0.00000000  |
| C | 0.33316704  | -1.36287677 | -0.33832800 |
| C | 1.49129304  | -2.10669877 | -0.54098800 |
| C | 2.71094504  | -1.46224077 | -0.37811100 |
| C | 2.77330004  | -0.10224277 | -0.02556200 |
| C | 1.60642204  | 0.63321623  | 0.15184700  |
| H | -0.53800996 | 0.54165923  | 0.14917100  |
| H | -0.63004296 | -1.84665477 | -0.45033700 |
| H | 1.44466404  | -3.15306477 | -0.81700600 |
| H | 1.65181104  | 1.68223223  | 0.42143200  |
| C | 4.93769204  | -1.04015377 | -0.07628100 |
| C | 6.26416904  | -0.86766477 | -0.98614600 |
| C | 6.95493104  | 0.41171423  | -0.59132400 |

---

|   |            |             |             |
|---|------------|-------------|-------------|
| C | 6.28482804 | 1.47220523  | −0.12039100 |
| C | 4.83709404 | 1.43015023  | 0.06287400  |
| C | 4.18083504 | 0.25963023  | 0.03122600  |
| H | 5.82118604 | −0.76404277 | −1.99355500 |
| H | 8.02838804 | 0.43510723  | −0.74052700 |
| H | 6.80609304 | 2.39671323  | 0.09800700  |
| H | 4.29192304 | 2.36129823  | 0.17328200  |
| O | 7.00397404 | −1.98565877 | −0.88427300 |
| H | 6.69521804 | −2.49611777 | 0.21206600  |
| N | 3.99509904 | −1.98076277 | −0.58420500 |
| H | 4.18730604 | −2.95290477 | −0.37761700 |
| O | 6.00151704 | −2.65069777 | 1.10275600  |
| O | 5.45192504 | −1.38880777 | 1.19588000  |

TS79

0 2

|   |             |             |             |
|---|-------------|-------------|-------------|
| C | 0.01915426  | −0.83962437 | −0.01074115 |
| C | −0.00240574 | −2.23144237 | −0.12864215 |
| C | 1.13159126  | −3.00023037 | 0.12113785  |
| C | 2.29369526  | −2.34485937 | 0.51011985  |
| C | 2.31813426  | −0.93553737 | 0.62717785  |
| C | 1.18938326  | −0.17720937 | 0.35541185  |
| H | −0.88138474 | −0.27178137 | −0.20894715 |
| H | −0.92238874 | −2.72337437 | −0.42201215 |
| H | 1.12089026  | −4.07852037 | 0.02346385  |
| H | 1.20860426  | 0.90391863  | 0.43669785  |
| C | 4.35422026  | −1.94852837 | 1.04999185  |
| C | 5.62464026  | −1.63960737 | −0.62026715 |
| C | 6.40145226  | −0.52126037 | −0.07931915 |
| C | 5.83909626  | 0.53095363  | 0.54735985  |
| C | 4.38838726  | 0.55609363  | 0.73891685  |
| C | 3.71164026  | −0.59075037 | 0.90881285  |
| H | 4.84175726  | −1.42040037 | −1.34216715 |
| H | 7.48356226  | −0.59438637 | −0.16038915 |
| H | 6.44441226  | 1.36496463  | 0.88124885  |
| H | 3.85044126  | 1.49445163  | 0.63532985  |
| O | 6.26723726  | −2.79984537 | −0.90087915 |
| H | 6.72948626  | −3.10870137 | −0.10995515 |
| N | 3.51445826  | −2.93663537 | 0.85202985  |
| O | 5.82378926  | −3.46620637 | 1.89658785  |

|      |             |             |             |
|------|-------------|-------------|-------------|
| O    | 5.37460426  | −2.11985837 | 1.95838485  |
| H    | 4.98266826  | −3.95605137 | 1.79460885  |
| TS80 |             |             |             |
| 0 2  |             |             |             |
| C    | −1.85114507 | −1.12595418 | 0.00000000  |
| C    | −2.03160607 | −2.49666518 | 0.17177800  |
| C    | −0.94922307 | −3.34506818 | 0.41547300  |
| C    | 0.30842093  | −2.77711418 | 0.48275300  |
| C    | 0.49964893  | −1.39572918 | 0.31258200  |
| C    | −0.57659507 | −0.56004418 | 0.06758300  |
| H    | −2.70847907 | −0.49250918 | −0.19132100 |
| H    | −3.03020707 | −2.91278718 | 0.11226700  |
| H    | −1.08102307 | −4.41166318 | 0.54726500  |
| H    | −0.44162907 | 0.50700782  | −0.07161200 |
| C    | 2.44057993  | −2.54370618 | 0.69045300  |
| C    | 4.92854093  | −1.48378618 | −1.15070300 |
| C    | 5.06679893  | −0.41480718 | −0.13172100 |
| C    | 4.06341193  | 0.21300382  | 0.48586300  |
| C    | 2.62072493  | −0.01283318 | 0.35121000  |
| C    | 1.94776093  | −1.16645418 | 0.43768700  |
| H    | 5.59628893  | −2.34304318 | −1.01747400 |
| H    | 6.08936193  | −0.14774518 | 0.11610400  |
| H    | 4.32721393  | 1.02131182  | 1.16421400  |
| H    | 2.02479093  | 0.88991882  | 0.22787500  |
| O    | 3.88351493  | −1.61645018 | −1.85582700 |
| N    | 1.53491493  | −3.44923118 | 0.71987100  |
| O    | 3.94998693  | −4.19128318 | 1.12400500  |
| O    | 3.73178593  | −2.80861218 | 0.89807400  |
| H    | 3.04574693  | −4.56371518 | 1.04821300  |
| H    | 4.29979793  | −1.16571018 | −2.93769700 |
| O    | 6.03428593  | −0.68783518 | −2.52100300 |
| O    | 5.21250793  | −0.68101518 | −3.48759800 |
| TS81 |             |             |             |
| 0 2  |             |             |             |
| C    | −0.47709921 | −0.09541985 | 0.00000000  |
| C    | −0.52112221 | −1.44605585 | −0.35708100 |
| C    | 0.63608779  | −2.16316085 | −0.64702600 |

|   |             |             |             |
|---|-------------|-------------|-------------|
| C | 1.85134179  | −1.49665085 | −0.56264800 |
| C | 1.90764479  | −0.14212085 | −0.18899200 |
| C | 0.74180479  | 0.56604315  | 0.08212400  |
| H | −1.39639421 | 0.43264515  | 0.21868500  |
| H | −1.47951021 | −1.94886885 | −0.41362100 |
| H | 0.59027879  | −3.20632785 | −0.93533600 |
| H | 0.78653279  | 1.61039115  | 0.36973600  |
| C | 4.08688579  | −1.04210285 | −0.36308000 |
| C | 5.36494779  | −0.87377985 | −1.21101700 |
| C | 6.04960779  | 0.43202815  | −0.99429500 |
| C | 5.36696379  | 1.49888615  | −0.53819800 |
| C | 3.93918079  | 1.43404115  | −0.24851400 |
| C | 3.30673679  | 0.25015515  | −0.22169800 |
| H | 4.72362779  | −0.58566185 | −2.30022900 |
| H | 7.09478779  | 0.48559415  | −1.27535500 |
| H | 5.87053779  | 2.45207915  | −0.42221600 |
| H | 3.38768879  | 2.35912315  | −0.12406300 |
| O | 6.02616579  | −1.92628185 | −1.50144300 |
| N | 3.12834479  | −1.98115785 | −0.88018400 |
| H | 3.34168979  | −2.95255985 | −0.69138000 |
| O | 4.97366579  | −2.71043685 | 0.97983400  |
| O | 4.51456979  | −1.37129285 | 0.97173500  |
| H | 5.85297579  | −2.65532785 | 0.57073300  |
| O | 2.78401279  | −0.28271985 | −3.35735400 |
| O | 3.96487979  | −0.03517485 | −3.35145900 |

TS82

02

|   |             |             |             |
|---|-------------|-------------|-------------|
| C | −0.59420289 | −0.10869565 | 0.00000000  |
| C | −0.68618889 | −1.48214865 | −0.24623800 |
| C | 0.43657411  | −2.30257865 | −0.22818100 |
| C | 1.65861511  | −1.71212265 | 0.07051000  |
| C | 1.76579811  | −0.33287865 | 0.32520800  |
| C | 0.63575711  | 0.47606935  | 0.27590200  |
| H | −1.48839389 | 0.50107035  | −0.02585600 |
| H | −1.65407389 | −1.91943365 | −0.46084700 |
| H | 0.36103411  | −3.36332865 | −0.43261500 |
| H | 0.71116711  | 1.54127435  | 0.46192300  |
| C | 3.87396011  | −1.34953465 | 0.47257200  |
| C | 5.19786011  | −1.02415465 | −0.96526000 |

---

|   |            |             |             |
|---|------------|-------------|-------------|
| C | 5.89460711 | 0.18502635  | −0.37846900 |
| C | 5.28487311 | 1.17073535  | 0.29289400  |
| C | 3.84712711 | 1.13570535  | 0.53086100  |
| C | 3.18130811 | −0.03850465 | 0.52703400  |
| H | 4.43585011 | −0.78778565 | −1.73233900 |
| H | 6.96442211 | 0.21077035  | −0.55791100 |
| H | 5.84842911 | 2.03775735  | 0.61965400  |
| H | 3.30024011 | 2.06996135  | 0.60250100  |
| O | 5.83499711 | −2.10461465 | −1.04746500 |
| N | 2.91644911 | −2.29729665 | 0.13755600  |
| H | 3.10228811 | −3.28187065 | 0.25217200  |
| O | 5.17843811 | −2.99567165 | 1.33405700  |
| O | 4.73241511 | −1.65932065 | 1.50598500  |
| H | 5.78977511 | −2.89510565 | 0.56917800  |

TS83

02

|   |             |             |             |
|---|-------------|-------------|-------------|
| C | 0.46376811  | −0.15942029 | 0.00000000  |
| C | 0.21871211  | −1.52412229 | 0.20176100  |
| C | 1.25418311  | −2.41619629 | 0.44293100  |
| C | 2.54390711  | −1.89844329 | 0.48742400  |
| C | 2.81198511  | −0.53121429 | 0.28664800  |
| C | 1.75658911  | 0.34312771  | 0.03552600  |
| H | −0.36701089 | 0.50766771  | −0.19288700 |
| H | −0.79932289 | −1.89256029 | 0.16574600  |
| H | 1.06431411  | −3.47167229 | 0.59502700  |
| H | 1.94079411  | 1.39723571  | −0.13769900 |
| C | 4.78575111  | −1.65251729 | 0.62265200  |
| C | 7.36613111  | −0.59994529 | −1.08882700 |
| C | 7.38722111  | 0.48135071  | −0.08865700 |
| C | 6.31985311  | 1.14596071  | 0.42892900  |
| C | 4.91638111  | 0.86460671  | 0.36699600  |
| C | 4.25536611  | −0.34349529 | 0.37373100  |
| H | 8.36211511  | −1.02210329 | −1.32205700 |
| H | 8.37646411  | 0.87131571  | 0.13451000  |
| H | 6.55434611  | 2.07341171  | 0.94920200  |
| H | 4.27819411  | 1.74339071  | 0.41709600  |
| O | 6.38817611  | −0.98994729 | −1.67997000 |
| N | 3.74789411  | −2.54249929 | 0.71360700  |
| H | 3.88545211  | −3.52552429 | 0.88944400  |

---

|   |            |             |            |
|---|------------|-------------|------------|
| O | 6.37122411 | −1.63424829 | 2.38696200 |
| O | 5.99749711 | −2.02282129 | 0.85509900 |
| H | 6.96313411 | −0.89962329 | 2.16339500 |

TS84

0 1

|   |             |             |             |
|---|-------------|-------------|-------------|
| C | 0.25036818  | −0.21354933 | 0.00000000  |
| C | 0.19835518  | −1.37748033 | −0.79663600 |
| C | 1.33222518  | −1.91842233 | −1.36547200 |
| C | 2.55056618  | −1.26244333 | −1.13537000 |
| C | 2.62229318  | −0.13561433 | −0.27207400 |
| C | 1.44993918  | 0.41876067  | 0.25467800  |
| H | −0.66439182 | 0.16984667  | 0.43417900  |
| H | −0.75907182 | −1.85669033 | −0.96304300 |
| H | 1.28634618  | −2.80261833 | −1.98937400 |
| H | 1.49376518  | 1.29275067  | 0.89340600  |
| C | 4.79023018  | −0.92950033 | −0.78251000 |
| C | 6.07548018  | −0.45956233 | −1.46916900 |
| C | 6.78808418  | 0.50826067  | −0.55940300 |
| C | 6.11918918  | 1.34570667  | 0.24716500  |
| C | 4.66446118  | 1.28895467  | 0.34723800  |
| C | 4.01189118  | 0.24515067  | −0.18196500 |
| H | 5.79835318  | 0.06455067  | −2.39201100 |
| H | 7.87028518  | 0.52463867  | −0.62721700 |
| H | 6.65104518  | 2.07791267  | 0.84284300  |
| H | 4.13230918  | 2.06661467  | 0.88530400  |
| O | 6.87540418  | −1.55415033 | −1.84185700 |
| H | 6.91452118  | −2.13292233 | −1.06871300 |
| N | 3.77579718  | −1.51988833 | −1.68381200 |
| H | 3.98365918  | −2.45379433 | −2.02345800 |
| O | 2.65138518  | −1.42995233 | 2.92176000  |
| O | 5.02990418  | −1.93566433 | 0.10680100  |
| N | 3.37906218  | −1.52237733 | 1.96566300  |
| O | 4.58340318  | −1.47962633 | 2.00192500  |

TS85

0 2

|   |             |             |             |
|---|-------------|-------------|-------------|
| C | −0.89935767 | −1.18843681 | 0.00000000  |
| C | −1.00141167 | −2.56962581 | −0.32172800 |

---

|   |             |             |             |
|---|-------------|-------------|-------------|
| C | 0.10431233  | −3.35243181 | −0.51624800 |
| C | 1.37233133  | −2.73952881 | −0.37974200 |
| C | 1.48164633  | −1.34766981 | −0.03152500 |
| C | 0.32674133  | −0.57662281 | 0.13913500  |
| H | −1.80835067 | −0.61720081 | 0.14213000  |
| H | −1.98714467 | −3.01052581 | −0.41125000 |
| H | 0.02558533  | −4.40491581 | −0.75590800 |
| H | 0.40124833  | 0.47390719  | 0.39285800  |
| C | 3.63438533  | −2.36848981 | −0.04680400 |
| C | 4.90364533  | −2.27565381 | −0.88779700 |
| C | 5.64434733  | −1.00634881 | −0.52665500 |
| C | 5.00918833  | 0.10925319  | −0.13813700 |
| C | 3.55790633  | 0.12712319  | −0.00153400 |
| C | 2.88180933  | −1.03772981 | −0.01512500 |
| H | 4.63168333  | −2.22682081 | −1.94986500 |
| H | 6.72215733  | −1.03460581 | −0.64494200 |
| H | 5.56217733  | 1.02059019  | 0.05567800  |
| H | 3.04038033  | 1.07649619  | 0.09026700  |
| O | 5.68838833  | −3.42793881 | −0.70868600 |
| H | 5.63037033  | −3.62930581 | 0.23714900  |
| N | 2.58591833  | −3.25854681 | −0.62244900 |
| H | 2.74132633  | −4.25825681 | −0.57352400 |
| O | 3.97593633  | −2.81786181 | 1.20666200  |
| H | 3.01966833  | −2.86753581 | 1.74746700  |
| O | 1.71595633  | −2.91582381 | 2.05373600  |
| H | 1.43969433  | −2.26720381 | 2.70770000  |

TS86

0 2

|   |             |             |             |
|---|-------------|-------------|-------------|
| C | 0.33333333  | 0.26086957  | 0.00000000  |
| C | −0.18929767 | −1.03271443 | −0.09143900 |
| C | 0.61702333  | −2.13006643 | −0.38297600 |
| C | 1.97316933  | −1.90345143 | −0.57438200 |
| C | 2.51500133  | −0.60469043 | −0.47922000 |
| C | 1.69064733  | 0.48128457  | −0.19369100 |
| H | −0.32348467 | 1.09024057  | 0.22882800  |
| H | −1.24988767 | −1.18864143 | 0.06741900  |
| H | 0.19880633  | −3.12620343 | −0.45999600 |
| H | 2.10698933  | 1.47879957  | −0.11194200 |
| C | 4.24235333  | −2.19408843 | −0.83896500 |



---

|   |            |             |             |
|---|------------|-------------|-------------|
| C | 5.29050533 | -2.47092843 | -1.92470300 |
| C | 6.44559933 | -1.77872843 | -1.19243200 |
| C | 6.24643633 | -0.28280643 | -1.16721800 |
| C | 4.93236833 | 0.18982457  | -0.92054100 |
| C | 3.93285233 | -0.71408143 | -0.72190400 |
| H | 5.02947733 | -2.01908043 | -2.87886300 |
| H | 7.43123733 | -2.06935043 | -1.55492100 |
| H | 6.94214133 | 0.33157957  | -1.72490800 |
| H | 4.73265033 | 1.25534257  | -0.91568000 |
| O | 5.50726933 | -3.83655843 | -2.11445800 |
| H | 5.81113533 | -4.20791543 | -1.27700000 |
| N | 2.96370733 | -2.81791243 | -0.92672700 |
| H | 2.88442233 | -3.79927843 | -0.70756700 |
| O | 6.32819833 | -2.36372643 | 0.11994200  |
| O | 4.93060133 | -2.67384543 | 0.33312700  |
| O | 7.36986433 | 0.14852757  | 0.49369300  |
| O | 8.49469633 | -0.30850543 | 0.37289200  |

TS87

02

|   |             |             |             |
|---|-------------|-------------|-------------|
| C | -0.97101448 | 0.10144928  | 0.00000000  |
| C | -0.72973548 | 1.48358328  | 0.16452600  |
| C | -1.74332848 | 2.42048228  | 0.16997600  |
| C | -3.05913448 | 1.96048128  | 0.00939600  |
| C | -3.31494248 | 0.56995628  | -0.14119500 |
| C | -2.25956848 | -0.35743972 | -0.15202200 |
| H | -0.13770148 | -0.58861172 | 0.00008100  |
| H | 0.29281452  | 1.82165328  | 0.28993900  |
| H | -1.53323448 | 3.47541828  | 0.29284900  |
| H | -2.46562748 | -1.41507472 | -0.26996100 |
| C | -5.35873448 | 1.77186228  | -0.01060900 |
| C | -6.47654448 | 2.09066928  | -1.01802700 |
| C | -7.46383248 | 0.95022528  | -0.78359300 |
| C | -6.88817848 | -0.41032372 | -0.74773500 |
| C | -5.54443148 | -0.66272072 | -0.50280200 |
| C | -4.71766648 | 0.42061628  | -0.27336000 |
| H | -6.11025548 | 2.14898328  | -2.04523200 |
| H | -8.35154148 | 1.06425428  | -1.41570300 |
| H | -7.58488248 | -1.23541772 | -0.84839000 |
| H | -5.17516448 | -1.68029672 | -0.46898500 |

|      |             |             |             |
|------|-------------|-------------|-------------|
| O    | -7.06654548 | 3.31292628  | -0.68763900 |
| H    | -7.34640848 | 3.21663028  | 0.23547100  |
| N    | -4.20998448 | 2.68213028  | -0.06693900 |
| H    | -4.30571248 | 3.58750528  | 0.37030000  |
| O    | -5.91703848 | 1.77979228  | 1.24169900  |
| O    | -7.77697148 | 0.88210228  | 0.56763300  |
| TS88 |             |             |             |
| 01   |             |             |             |
| C    | -1.45038161 | 0.38167938  | 0.00000000  |
| C    | -1.83290761 | -0.95930962 | -0.01666100 |
| C    | -0.90420761 | -1.98032962 | -0.21175300 |
| C    | 0.42474239  | -1.62190762 | -0.38408500 |
| C    | 0.82355339  | -0.27539062 | -0.36555500 |
| C    | -0.11301361 | 0.72981238  | -0.17465700 |
| H    | -2.19538661 | 1.15226438  | 0.15242800  |
| H    | -2.87615361 | -1.21665262 | 0.12386500  |
| H    | -1.21230561 | -3.01881262 | -0.23119800 |
| H    | 0.19473939  | 1.76930338  | -0.15430700 |
| C    | 2.72179039  | -1.70224462 | -0.54449600 |
| C    | 3.86436139  | -1.96571962 | -1.51982300 |
| C    | 4.89979339  | -1.11952762 | -0.79147000 |
| C    | 4.62967639  | 0.40200738  | -0.95021600 |
| C    | 3.16317839  | 0.72332038  | -0.75843100 |
| C    | 2.27194639  | -0.24925962 | -0.57168800 |
| H    | 3.63671239  | -1.62351762 | -2.52741100 |
| H    | 5.93235839  | -1.35428462 | -1.05180900 |
| H    | 4.92162239  | 0.63291338  | -1.99998100 |
| H    | 2.88460539  | 1.77227638  | -0.76064200 |
| O    | 4.21754139  | -3.32034062 | -1.57897800 |
| H    | 4.45844139  | -3.60125562 | -0.68809300 |
| N    | 1.51726739  | -2.45511062 | -0.65365800 |
| H    | 1.52499339  | -3.41774662 | -0.35135700 |
| O    | 4.72337039  | -1.51803262 | 0.57457200  |
| O    | 3.36627939  | -2.00661462 | 0.71302200  |
| O    | 5.46719539  | 1.11735538  | -0.15571700 |
| O    | 7.37066739  | 2.60374038  | 2.32346200  |
| O    | 6.02931539  | 0.95517538  | 1.79670000  |
| N    | 6.65845139  | 1.91990438  | 1.67472300  |

---

TS89

0 2

|   |             |             |             |
|---|-------------|-------------|-------------|
| C | 0.51391867  | −0.48179871 | 0.00000000  |
| C | −0.01869633 | −1.76463571 | −0.12097200 |
| C | 0.77420367  | −2.85178171 | −0.48770800 |
| C | 2.11927067  | −2.61595471 | −0.72313600 |
| C | 2.66830467  | −1.33140871 | −0.60324300 |
| C | 1.86740567  | −0.25876471 | −0.24269200 |
| H | −0.12621333 | 0.34203029  | 0.28854300  |
| H | −1.07264533 | −1.92464471 | 0.07333300  |
| H | 0.35110167  | −3.84409871 | −0.58670000 |
| H | 2.29019967  | 0.73435729  | −0.14074000 |
| C | 4.37841467  | −2.92050571 | −1.02617400 |
| C | 5.47862567  | −3.30586171 | −2.00686200 |
| C | 6.62748267  | −2.76516071 | −1.20112000 |
| C | 6.46097767  | −0.70493871 | −1.48960700 |
| C | 5.01745667  | −0.48415971 | −1.10574000 |
| C | 4.09403767  | −1.42900971 | −0.93259100 |
| H | 5.35499267  | −2.83739271 | −2.98044300 |
| H | 7.67454767  | −2.90230371 | −1.45002100 |
| H | 6.63543367  | −0.89994471 | −2.56757200 |
| H | 4.75753167  | 0.55981829  | −0.94897400 |
| O | 5.55554267  | −4.69816671 | −2.20904400 |
| H | 5.73010567  | −5.12236971 | −1.36095700 |
| N | 3.10075067  | −3.52230871 | −1.15512000 |
| H | 3.01121467  | −4.51231071 | −0.98231000 |
| O | 6.37324467  | −3.02303371 | 0.10807900  |
| O | 4.98386367  | −3.36868371 | 0.22909200  |
| O | 7.36714867  | −0.21042871 | −0.81259200 |

## TS90

0 2

|   |             |             |             |
|---|-------------|-------------|-------------|
| C | −1.06870224 | −0.26717557 | 0.00000000  |
| C | −1.52713224 | −1.55873957 | 0.27971700  |
| C | −0.65227424 | −2.63037557 | 0.41531800  |
| C | 0.70666276  | −2.38107357 | 0.25444300  |
| C | 1.17584676  | −1.09496857 | −0.04135200 |
| C | 0.28997276  | −0.02796557 | −0.15692600 |
| H | −1.77776124 | 0.54462743  | −0.09896700 |

|   |             |             |             |
|---|-------------|-------------|-------------|
| H | -2.59082924 | -1.73013657 | 0.39696100  |
| H | -1.01463624 | -3.62475257 | 0.64541600  |
| H | 0.65269876  | 0.96872043  | -0.38125800 |
| C | 2.96190476  | -2.65551157 | -0.12364400 |
| C | 3.31669876  | -3.16853457 | -1.57640100 |
| C | 4.79117776  | -3.06618757 | -1.51896200 |
| C | 4.94788676  | -0.15500157 | -0.17321600 |
| C | 3.47642076  | -0.11889357 | -0.19440400 |
| C | 2.63238376  | -1.16181557 | -0.12562800 |
| H | 2.83981976  | -2.55528057 | -2.33851300 |
| H | 5.45747776  | -2.50817857 | -2.16701300 |
| H | 5.43675476  | -1.10456657 | 0.09047100  |
| H | 3.06323676  | 0.88496643  | -0.24604400 |
| O | 2.86700076  | -4.49932157 | -1.74644100 |
| H | 3.54757576  | -5.10178057 | -1.42674600 |
| N | 1.76321176  | -3.28179957 | 0.39123100  |
| H | 1.61075076  | -4.22254757 | 0.04883300  |
| O | 5.20587576  | -3.39673757 | -0.31792300 |
| O | 4.07824676  | -3.01322157 | 0.66951500  |
| O | 5.60835076  | 0.83264643  | -0.40037900 |

**Table S4.** Calculated bond lengths (angstrom) and bond energies (kcal/mol) of C-H bonds and O-H bonds in the intermediates IM12-IM15 at M06-2X/6-311++G(3df,2p)//M06-2X/6-311+G(d,p) level.

| Intermediates | Bonds | Bond length<br>(angstrom) | Bond energy<br>(kcal/mol) |
|---------------|-------|---------------------------|---------------------------|
| IM12          | O-H   | 0.964                     | 61.19                     |
|               | C-H   | 1.099                     | 20.89                     |
| IM13          | O-H   | 0.963                     | 58.30                     |
|               | C-H   | 1.098                     | 17.40                     |
| IM14          | O-H   | 0.962                     | 59.67                     |
|               | C-H   | 1.102                     | 14.54                     |
| IM15          | O-H   | 0.962                     | 57.58                     |
|               | C-H   | 1.104                     | 16.80                     |

**Table S5** Comparison of the rate constants and lifetime of carbazole degradation by OH radical with those of other 5 kinds of NSO-HETs.

| Compound         | Structure                                                                           | T(K)    | P(Torr) | Rate constant<br>(cm <sup>3</sup> molecule <sup>-1</sup> s <sup>-1</sup> ) | Lifetime<br>(h) | Method                                | Ref.                      |
|------------------|-------------------------------------------------------------------------------------|---------|---------|----------------------------------------------------------------------------|-----------------|---------------------------------------|---------------------------|
| Pyrrole          |    | 298 ± 2 | 25-100  | $(1.03 \pm 0.06) \times 10^{-10}$                                          | 2.7             | Exp.                                  | (Wallington, 1986)        |
| Indole           |    | 297 ± 2 | 1 atm   | $(1.54 \pm 0.35) \times 10^{-10}$                                          | 2               | Exp.                                  | (Atkinson et al., 1995)   |
| Carbazole        |    | 298     | 1 atm   | $6.52 \times 10^{-12}$                                                     | 37.70           | M06-2X/6-311++G(3df,2p)//6-311+G(d,p) | This paper                |
| Dibenzothiophene |    | 297 ± 2 | 1 atm   | $(8.1 \pm 2.6) \times 10^{-12}$                                            | 36              | Exp.                                  | (Kwok et al., 1999)       |
| Dibenzofuran     |    | 298.15  | 1 atm   | $2.7 \times 10^{-11}$                                                      | 10.8            | B3LYP/6-311++G(3df,2p)//6-31g(d)      | (Altarawneh et al., 2008) |
| Fluorene         |  | 298     | 1 atm   | $2.29 \times 10^{-11}$                                                     | 12.51           | M06-2X/6-311++G(3df,2p)//6-311+G(d,p) | (Ding et al., 2019)       |

**Table S6.** RRKM calculated rate constants (in  $\text{cm}^3 \text{ molecule}^{-1} \text{ s}^{-1}$ ) for TS1, TS5 and TS14 involved in the OH-initiated oxidation degradation of carbazole at 298 K and 10–670 torr.

| Pressure (Torr) | TS1      | TS5      | TS14     |
|-----------------|----------|----------|----------|
| 10              | 5.76E-18 | 3.14E-12 | 8.42E-14 |
| 260             | 6.62E-17 | 3.66E-12 | 9.60E-14 |
| 510             | 1.03E-16 | 3.68E-12 | 9.64E-14 |
| 760             | 1.31E-16 | 3.70E-12 | 9.65E-14 |
